# Supplementary material for: The profound impact of COVID-19 on college students’ physical fitness
Source: PeerJ. 2025 Oct 23;13:e20293. doi: 10.7717/peerj.20293 (PMC12554305; doi:10.7717/peerj.20293)
Supplement: Supplemental Information 2 [file peerj-13-20293-s002.xlsx]

## Sheet: Y2019
Gender	Age	Height (cm)	Weight (kg)	BMI (kg/m2)	Vital capacity (ml)	50-m dash (s)	Standing long jump (cm)	Sit-and-reach (cm)	800 m (s)	1000 m(s)	Sit-ups (count)	Pull-ups (count)	Total score
Female	18	163	45.5	17.1252	3451	8.9	200	20.5	205		55		86.3
Female	18	156	46.5	19.1075	2965	9.2	160	26	214		35		81.1
Female	19	151	48	21.0517	3288	9.2	170	24	233		44		81.5
Female	18	149	40	18.0172	2515	9.7	155	16	180		54		76.2
Female	19	160	56	21.875	2962	9.4	170	20.5	231		51		79.2
Male	18	174	53	17.5056	4113	7.6	250	25.5		241		14	78.2
Female	18	164	44.5	16.5452	2839	9.9	150	25.6	191		48		72.3
Male	18	168	56	19.8413	4106	8.7	170	17		262		2	59.8
Female	18	158	49	19.6283	3749	9.6	160	0	216		32		73.4
Male	18	178	77.5	24.4603	5574	7.7	230	8.5		256		2	68.6
Male	19	172	51	17.239	3664	7.8	235	16.5		251		2	65.2
Male	18	165	52	19.1001	3904	7.4	215	17		232		8	74.2
Female	18	163	52.5	19.7599	2927	8.5	200	13	219		48		82.3
Female	18	161	44	16.9747	2688	9.7	155	25.8	238		36		74
Female	19	160	45.5	17.7734	2372	8.9	170	18	228		37		77.3
Male	18	156	59	24.2439	3505	7.7	210	21		264		10	69.6
Male	19	170	56	19.3772	5981	7.4	240	22		184		18	87.3
Female	19	161	46.5	17.9391	3088	8.8	190	28.5	203		52		82.1
Female	19	156	49	20.1348	3472	9.9	170	33	202		26		78.8
Female	19	155	35.5	14.7763	3066	9.1	175	25.5	223		43		79.1
Female	19	157	45	18.2563	2414	9.7	180	7	188		22		70.2
Female	19	178	57.5	18.148	3635	8.7	210	20.5	183		47		85.6
Female	19	160	42.5	16.6016	2526	9.6	175	13.5	196		48		71.5
Male	18	177	57	18.194	3580	7.4	230	13.5		209		1	71.8
Female	18	153	43	18.369	3288	8.9	180	21	209		40		84.3
Male	19	173	70	23.3887	4749	7.6	235	10		232		19	81.8
Female	19	173	57.5	19.2121	3404	9.4	180	13.5	195		39		78.8
Female	19	162	52	19.8141	1582	9.7	150	20	204		55		63.5
Male	18	182	60	18.1138	3800	8.3	200	7.5		244		2	59.5
Male	18	176	110	35.5114	4999	8.5	200	17		303		2	54.3
Female	18	168	71.6	25.3685	3584	8.8	170	24	183		31		79.3
Female	19	160	58.5	22.8516	3398	10.2	162	21	186		26		66.3
Male	19	184	68.8	20.3214	6186	6.8	260	12.4		223		0	80.3
Female	18	161	62.2	23.996	3003	9.9	160	15.6	203		38		70.8
Male	18	176	78.8	25.439	4092	8.5	176	9.5		298		0	51.4
Male	18	184	60.1	17.7517	4502	7.7	232	4.5		236		11	73.2
Male	19	180	65.7	20.2778	4012	6.9	240	9		261		10	77.1
Male	18	167	51.4	18.4302	4208	7.4	230	12		269		10	73.9
Female	18	169	53.9	18.8719	3822	9.1	172	19.5	223		55		85.3
Female	18	163	62.3	23.4484	3360	9.4	182	20	237		25		78.7
Male	17	172	52	17.5771	3954	7.1	257	11		295		12	69.4
Female	17	165	49.1	18.0349	2584	9.9	172	20	187		33		74.3
Female	18	164	54.4	20.2261	3408	8.4	185	16.5	203		42		87.8
Female	18	165	54	19.8347	3627	8.2	180	12	180		40		82.4
Male	18	170	64.4	22.2837	4147	7.6	232	8		313		0	61
Female	19	167	54.1	19.3983	3405	9.3	210	7	212		44		84.8
Male	18	171	69.2	23.6654	5580	7.4	215	10		262		6	73
Male	20	171	65	22.2291	4815	6.6	260	20		208		16	91
Female	19	159	49	19.3821	3197	8.3	192	15	185		53		83.7
Male	18	175	58.6	19.1347	3684	7.2	225	10		271		1	66.4
Male	20	165	51.5	18.9164	3800	7.5	210	28.3		266		4	69.1
Female	18	172	56.1	18.963	3650	9.5	188	11	194		33		78.9
Female	18	155	54.7	22.768	2332	9.5	170	18	231		35		68.3
Male	19	180	66	20.3704	5405	7.6	230	20.2		247		4	74.3
Female	18	168	58.8	20.8333	3353	8.8	178	29.5	193		30		81.8
Female	18	158	54	21.6311	3113	9.2	152	12.5	191		35		74.4
Female	19	165	48.8	17.9247	3040	9.3	185	17	214		19		75.6
Female	19	164	47.7	17.735	2925	10.5	155	7	184		35		70.1
Female	19	160	47.6	18.5938	2952	9.5	184	14.3	185		4		69.5
Female	18	161	58	22.3757	3826	10.6	160	6	183		35		63.4
Male	18	180	88	27.1605	6410	7.5	185	10.5		242		2	62.8
Male	18	177	70	22.3435	4330	8.3	225	-7		293		1	55.4
Male	19	186	77	22.2569	4927	7.2	230	5.5		227		6	75.7
Female	18	156	61	25.0657	3642	8.8	165	15	189		30		76.2
Female	19	152	47	20.3428	2599	10.8	145	11.5	196		16		56.5
Female	19	156	40	16.4366	2617	9	165	13	226		39		73.8
Female	18	163	53	19.9481	3646	9.7	175	27	239		37		82.6
Female	19	168	51	18.0697	2856	9.2	160	14	232		46		77.4
Male	19	186	83	23.9912	5313	8.4	250	4		254		1	67.4
Male	19	174	78	25.763	5487	7.8	210	10.4		235		2	69
Female	19	169	58	20.3074	2979	9.6	200	11.5	237		34		68.5
Male	19	172	53	17.9151	4387	7	235	3		202		12	82
Female	18	163	53	19.9481	2967	9.3	185	17.4	191		34		76.7
Female	19	161	41	15.8173	2749	8.8	200	16.5	221		38		77.7
Female	19	155	44	18.3143	2939	8.9	160	16	213		44		80.3
Male	19	190	75	20.7756	5118	7.4	260	4		240		2	74.1
Female	18	159	51	20.1733	3380	8.6	185	20.5	221		38		83.7
Male	19	167	60	21.5139	4780	7.4	230	12		234		7	74.8
Female	17	161	54	20.8325	2736	9	160	10	185		33		64.3
Male	18	168	69	24.4473	4710	7.8	210	13		249		2	66
Male	18	173	65	21.7181	5422	8	225	15.3		263		2	70.8
Female	19	160	48	18.75	3156	9.6	180	13.5	224		48		79.8
Female	18	162	42	16.0037	3119	9.9	160	14.5	185		45		72.4
Male	18	173	55	18.3768	3733	7.7	235	5.5		225		6	71.3
Female	18	152	42	18.1787	2822	9.3	155	12	236		55		77.7
Female	19	152	51	22.0741	3097	9.7	175	22	194		29		76.1
Female	19	160	76	29.6875	3827	9.6	155	14	181		31		71.4
Male	18	175	69	22.5306	4591	7.3	215	14.5		238		2	71.4
Female	19	164	47	17.4747	3345	9.4	170	9.5	233		35		77.7
Female	19	166	46	16.6933	3723	9.5	160	19	189		43		76.8
Female	18	160	49	19.1406	3407	8.7	165	15	211		36		83.2
Female	18	165	50	18.3655	3228	9	165	18	182		49		84.3
Male	18	167	61	21.8724	4797	7.5	215	19.5		245		8	75.7
Male	18	169	59	20.6575	4656	7.4	210	8		251		2	69.2
Female	19	165	50	18.3655	3224	8.2	200	15.5	183		41		85.5
Female	18	158	45	18.026	3205	8.8	185	15.9	217		48		82.9
Male	18	176	77	24.858	6586	7.9	215	23.9		300		0	65.1
Female	18	181	57	17.3987	2961	8.3	175	20.3	211		52		84.3
Male	18	178	64	20.1995	5022	7	260	2.5		241		13	80.4
Female	18	153	49	20.9321	3255	8.4	151	10	226		48		79.5
Female	19	157	56	22.719	3159	9	165	11.5	209		58		84.8
Female	18	172	76	25.6896	4281	10.2	165	27.1	232		47		79
Male	18	163	45	16.937	4377	6.6	255	14.8		292		7	72.4
Female	18	160	47	18.3594	2914	7.9	205	8.3	214		42		84
Male	18	179	61	19.0381	4350	7.4	240	14		259		6	72
Female	18	168	50	17.7154	2271	9.5	160	19.4	184		36		74.2
Male	18	175	56	18.2857	5108	7.1	250	15		242		5	75.4
Female	20	150	57	25.3333	3469	8.4	180	23	225		56		85
Female	19	161	50	19.2894	3441	9.2	173	9	198		55		87.3
Female	19	173	60	20.0474	3974	8.2	185	24.5	229		25		84.1
Female	17	164	63	23.4236	3116	9.9	155	10.5	191		34		73
Male	18	176	59	19.047	4139	7.5	210	15.3		272		2	67.2
Female	18	160	45	17.5781	2989	9.1	185	13.2	184		17		71.5
Male	18	176	60	19.3698	4392	8	225	30		268		26	86.8
Female	18	156	49	20.1348	3009	8.8	185	20	224		36		80.8
Female	17	160	53	20.7031	3348	10.6	155	30.8	219		38		75.9
Female	20	156	45	18.4911	2649	9.4	155	22.8	185		34		76.6
Male	19	174	70	23.1206	4618	7.6	195	14.2		239		1	67.3
Male	19	180	56	17.284	4698	7.4	215	18.7		221		6	72.2
Female	18	163	67	25.2174	3649	9.1	191	18.6	180		50		66.2
Female	18	172	60	20.2812	4025	9.4	168	24	180		45		82.3
Female	19	162	54	20.5761	3212	9.7	152	24	188		50		79
Female	18	165	55	20.202	2959	8.9	165	13.3	237		50		78.6
Male	19	184	80	23.6295	5007	7.9	180	9.8		256		0	63.6
Male	18	178	60	18.937	4542	7.9	200	1.5		258		7	64.2
Male	19	170	47	16.263	3222	6.9	200	6.5		294		6	59.7
Male	18	170	55	19.0311	3947	7.1	243	18.5		222		13	80.9
Female	18	171	48	16.4153	3933	8.6	176	21.6	215		33		74.9
Female	18	160	55	21.4844	3942	9.8	152	16.2	229		49		80.3
Female	20	160	48	18.75	3052	9	130	19.5	189		50		72.9
Female	19	158	45	18.026	3046	8.7	160	9	185		46		78.4
Female	19	152	46	19.91	3549	8.7	180	21	219		44		85.3
Female	18	173	70	23.3887	3459	9.8	151	12.3	182		38		77.2
Female	19	167	50	17.9282	3388	8.6	155	7.2	237		43		79
Male	18	181	55	16.7883	4626	7	238	6		222		2	71.3
Female	18	157	46	18.662	2297	9.4	158	19	226		39		75.4
Male	18	170	70	24.2215	3925	7.9	160	12.5		273		0	54.4
Female	17	155	43	17.898	2607	8.3	161	16	238		51		79.1
Male	19	175	60	19.5918	4939	6.5	232	12		209		12	87.3
Female	18	163	46	17.3134	2563	8.6	162	21	185		43		78.6
Male	18	175	70	22.8571	4968	8.1	160	4		254		0	62.5
Female	17	168	65	23.03	3525	8.5	196	24.5	211		58		92.1
Female	18	160	58	22.6562	3449	9	176	27	189		47		84
Male	19	165	54	19.8347	4553	7.1	220	18.2		229		8	77.5
Female	19	155	48	19.9792	2962	9	172	22.4	221		35		80.3
Female	19	165	92	33.7925	4345	10.2	151	20.4	226		33		64.6
Male	18	175	57	18.6122	3945	6.5	235	13.5		257		4	73.9
Female	19	158	52.5	21.0303	3261	9.5	134	12.5	228		42		73.5
Male	18	175	69	22.5306	5543	6.7	208	3.8		254		7	78.2
Female	18	170	57	19.7232	3045	9.2	190	12	197		48		77.5
Female	19	161	46	17.7462	3310	12	165	13	181		32		62.5
Female	18	162	58	22.1003	3503	8.4	207	26	184		48		89.6
Male	18	180	69	21.2963	4936	7.4	250	15.5		241		12	80.5
Male	18	178	57	17.9902	6141	7.7	240	8.5		254		9	77.2
Female	19	160	56	21.875	3377	10.3	145	10	197		25		70
Female	18	164	51	18.9619	3057	9.4	160	19.5	234		45		78.2
Male	18	175	55	17.9592	3274	7.5	240	10		243		3	67.9
Male	18	178	64	20.1995	4781	7.6	240	19		242		2	71
Female	18	159	48	18.9866	2391	12	150	11	199		29		55.9
Female	19	150	54	24	2838	10.8	145	14	218		29		56.8
Female	18	164	48	17.8465	3539	9.8	155	18	181		54		80.7
Female	18	163	72	27.0993	3442	11.2	150	3	181		33		46.6
Female	18	160	51	19.9219	3103	9.3	160	17	182		35		76.4
Male	18	179	64	19.9744	5919	7.4	245	8		246		3	73.6
Female	20	160	47	18.3594	3127	9.5	170	19	193		39		76.6
Female	19	166	53	19.2336	3471	9.1	155	24	237		44		82.7
Female	18	150	46	20.4444	2829	10.3	145	21.5	198		47		72.1
Female	18	161	45.5	17.5533	2078	9.7	170	23	213		35		72.2
Female	18	156	53	21.7784	2656	9.7	175	16	204		30		73.2
Male	19	178	65	20.5151	4593	7.2	250	16		248		3	72.5
Male	19	169	46	16.1059	3341	7.5	230	13		297		20	70
Female	19	167	56	20.0796	4042	9.1	180	19	180		46		82.6
Male	18	178	75	23.6713	4297	8.6	195	16		268		2	62.1
Female	18	163	51	19.1953	3343	8.3	200	17.5	237		51		84.4
Female	18	159	45	17.7999	2912	10.8	150	13	182		36		66.1
Male	18	164	51	18.9619	3340	7.3	220	13		249		2	67.6
Male	18	183	62	18.5135	4218	7.8	250	10		244		2	69.9
Male	19	179	71	22.1591	4339	7.9	230	6		302		2	60.6
Female	19	153	54	23.0681	2714	10	145	23	184		36		68.5
Female	18	154	46	19.3962	2197	8.1	207	21	236		66		90.6
Female	19	159	43	17.0088	2007	9.1	160	12	231		37		71
Female	19	158	46	18.4265	3073	9	170	7	233		37		76.8
Female	20	156	49	20.1348	3161	8.8	200	18	211		42		83.9
Female	19	158	57	22.8329	3428	9.3	200	19.5	232		38		83.4
Male	18	182	56	16.9062	3750	8.7	250	1		300		3	54.3
Female	18	161	44.5	17.1675	2903	10.3	170	13	187		30		73.3
Male	19	185	59	17.2389	4996	9.5	193	6		325		1	49.5
Female	18	165	47	17.2635	3401	9.5	168	15	239		51		81.1
Male	18	168	61	21.6128	4369	7.2	245	13		239		12	78.8
Female	18	168	52	18.424	2733	9.4	170	10	185		53		77.7
Male	19	189	61	17.0768	5568	7	280	10		241		1	75.2
Female	18	164	50	18.5901	3719	9.5	163	28	221		44		84.2
Male	19	184	90	26.5832	4859	8.1	210	10		264		1	64.7
Female	18	168	56	19.8413	3768	9.8	170	20	214		48		83
Female	18	171	56	19.1512	3227	9.9	172	24	217		33		81
Female	18	159	51	20.1733	3446	9.5	180	21	183		30		80.7
Male	19	158	40	16.0231	2375	8.7	220	5		242		5	54.3
Female	18	160	62	24.2188	3720	9.7	165	10	184		37		76.6
Female	18	167	49	17.5697	3125	9.6	170	19	185		50		79.1
Female	19	163	64	24.0882	3309	9.6	165	21.5	222		34		76.8
Female	19	163	54	20.3244	3521	10.1	188	22.5	183		46		90.9
Female	18	160	47	18.3594	2505	10.2	150	16	235		30		71.1
Female	18	168	57	20.1956	3227	9.6	165	15.5	238		28		76.2
Female	19	165	55	20.202	2911	9.8	155	11.5	185		41		75.1
Male	18	168	56	19.8413	4137	7.4	249	12		254		6	71.8
Female	18	170	55	19.0311	3624	10.1	172	30	229		40		82.8
Female	18	163	46	17.3134	3680	8.5	180	12	225		45		83.6
Female	18	156	45	18.4911	2205	9.8	156	19	182		32		72.6
Male	18	180	74	22.8395	4768	7	223	11.5		184		1	74.3
Female	19	170	63	21.7993	3987	10.1	185	23	237		36		81.2
Female	19	156	60	24.6548	3457	9.5	180	13	237		30		76.6
Male	18	178	73	23.04	4355	7	260	15		238		6	76.5
Male	17	180	95	29.321	5119	8.1	210	14.5		264		1	63.8
Female	19	158	45	18.026	2603	10.3	150	19	184		35		73.6
Female	17	174	62	20.4783	3815	9.6	180	31	231		31		82.6
Female	19	150	45	20	2766	9.7	178	25.5	221		29		78.8
Female	18	164	60	22.3081	3334	9.1	170	10	186		36		77.7
Male	18	168	50	17.7154	4357	7.2	235	18.5		235		12	76.4
Male	19	163	56	21.0772	4357	7.8	220	11		245		3	69
Female	19	161	47	18.132	2540	8.9	175	18	231		42		78.5
Female	19	155	49	20.3954	2933	8.8	185	16	232		50		80.6
Male	18	170	70	24.2215	4833	7.1	215	26		236		3	72.5
Female	18	162	52	19.8141	1185	9.7	150	16.5	185		30		62.4
Female	19	168	49	17.3611	3283	9.2	160	27	235		40		80.5
Female	18	165	50	18.3655	2983	8.6	170	15.5	193		56		80.1
Female	19	151	50	21.9289	3036	9.2	160	24	234		37		79.3
Female	18	160	65	25.3906	3083	10	165	19	217		34		68
Male	18	166	71	25.7657	3279	7.8	200	7.5		302		0	54.1
Male	18	168	58	20.5499	4494	7.3	210	21		239		5	72.5
Female	18	167	55	19.721	3262	8.4	185	6.5	211		37		81.3
Female	18	171	71	24.281	4306	9	185	16	234		30		78.4
Female	19	163	55	20.7008	3043	7.7	215	23	233		34		86
Female	18	161	47	18.132	2537	8.4	160	22	187		30		76.6
Male	19	178	84	26.5118	5331	7.2	260	12		265		2	70.5
Female	18	154	46	19.3962	2364	8.8	165	27.5	184		34		77.7
Female	18	157	60	24.3418	3036	9.2	170	18	224		35		75.8
Female	18	163	57	21.4536	3289	9.2	155	22	193		37		77
Male	18	186	61	17.6321	4481	9	170	5		301		0	50
Male	19	180	89	27.4691	5782	7.3	210	9		265		1	67.6
Female	19	159	64	25.3155	3374	8.7	165	13.5	239		30		76.5
Male	18	181	70	21.3669	4888	8.6	250	34.1		236		2	74.1
Male	18	172	59	19.9432	3550	7.2	220	9		228		4	68.9
Female	18	150	51	22.6667	2223	9.4	155	21.5	187		0		66.9
Female	17	161	55	21.2183	3125	9.3	160	23	180		34		77.8
Male	18	178	69	21.7776	5171	6.9	240	26		236		7	83.4
Female	19	162	56	21.3382	3177	8.5	155	6	224		27		71.6
Female	18	154	56	23.6128	3376	10	170	25.5	183		21		75.8
Female	18	152	35	15.1489	2566	9.7	145	6	195		37		65.9
Male	19	163	50	18.8189	4481	7.5	210	17.5		257		8	73.2
Female	18	170.5	49	16.8557	2846	9.2	170	12.1	236		46		74.2
Male	18	172.5	57.5	19.3237	3127	6.6	252	12		247		1	73
Female	19	160.5	51	19.7979	3013	9.4	165	10.5	184		52		77.4
Male	19	178	77	24.3025	5227	6.8	232	15		202		3	79.8
Female	18	173	71	23.7228	3172	9.3	155	-9	237		32		69.4
Female	18	159	45	17.7999	3497	9.3	170	25.4	193		38		81.5
Female	19	159.5	49	19.2608	3204	9.3	180	20.1	193		37		78.1
Male	18	173	55	18.3768	5148	7.7	205	3.3		241		7	71.4
Male	18	182.5	68	20.4166	5447	7.1	252	21		221		9	83.5
Female	18	163	46.5	17.5016	2747	9.2	200	8.6	224		40		78.9
Male	18	174	70	23.1206	4169	7.2	230	-3.8		256		0	62.2
Female	18	157	47	19.0677	2838	9.6	175	24	222		45		80.5
Female	18	155	43.5	18.1061	2398	10.8	150	4.5	206		37		59.3
Male	19	186	75	21.6788	5730	7.7	225	8.4		233		3	73
Male	19	176	66	21.3068	5155	7.5	260	-3		241		2	68.1
Female	18	171	72	24.623	3780	8.5	182	13.8	239		35		79.4
Female	18	165.5	47	17.1594	2943	9.2	170	25	189		38		78.6
Male	19	179	77	24.0317	6140	7.7	225	2		267		0	65
Male	19	179	63	19.6623	4811	7.3	248	18		231		2	75.3
Female	19	164.5	53	19.5859	3360	8.3	185	12	205		44		85.8
Male	18	168	53.5	18.9555	4031	7.4	225	5		246		6	70.1
Male	19	176	73	23.5666	4706	7.3	252	20		318		3	65.8
Female	18	164	51	18.9619	3297	8.8	160	9.5	231		30		77.1
Female	18	162	49	18.6709	3160	9.9	150	16	192		45		74.3
Female	18	157	49	19.8791	3470	9.4	162	25	181		48		82.1
Female	18	158.5	54	21.4949	3551	9.2	185	19.2	211		40		84.4
Female	19	170	52.3	18.0969	3587	8.7	200	21	217		31		86.1
Female	18	154.5	41	17.1762	2967	9.3	181	19	237		34		78.3
Female	18	158	46	18.4265	2699	8.2	178	7.6	229		40		78.8
Female	18	160	42	16.4062	3047	10.6	152	23.5	206		17		60.4
Male	20	164	57	21.1927	3911	7.5	220	13		240		2	69.2
Female	18	159	51	20.1733	3170	9.2	178	13.7	183		34		77.8
Female	18	155	49	20.3954	3373	9.4	168	11	239		39		78.5
Female	18	163	54	20.3244	3260	8.4	162	18.7	206		49		78.7
Male	18	175	43.5	14.2041	3016	7.4	245	0.5		237		10	65.3
Male	19	179	78	24.3438	5152	7.3	184	3		255		6	63.8
Female	19	163	51	19.1953	3015	9.5	165	10	226		46		77.6
Male	19	172	51	17.239	5321	7.4	240	20		242		6	74.7
Female	18	164	44.8	16.6568	2262	8.1	180	26.5	231		39		77.8
Male	18	178	60	18.937	4434	7	215	15		229		5	74
Female	19	160	52	20.3125	2890	9.5	150	18	237		48		75.6
Male	18	168	55	19.487	4605	8.3	193	11.5		241		0	65
Female	18	164	57	21.1927	3148	8.3	155	6.2	186		30		75.6
Female	18	165	52	19.1001	2280	10.1	145	11	202		40		57
Female	18	161	47	18.132	2646	9.5	150	13	211		33		70
Female	18	167	50	17.9282	3028	8.2	165	14.3	227		40		80
Female	19	160	60	23.4375	3146	10.6	145	7.5	202		33		53.8
Male	18	171	65	22.2291	3493	7.6	190	15.8		317		1	55.3
Female	18	168	52	18.424	2287	9.8	150	17	225		35		64.8
Female	19	163	57	21.4536	3139	9.4	180	25.4	198		44		78.9
Female	19	162	45	17.1468	2839	8.6	170	16	205		41		73
Female	18	163	50	18.8189	2586	9.9	147	27	184		27		69.3
Female	18	159	44	17.4044	3060	9.3	172	20.4	184		45		80.2
Male	18	174	62	20.4783	3685	8.1	210	10.5		317		1	58
Female	18	160	46	17.9688	2366	9.3	170	24.5	208		57		78
Female	19	153	48	20.5049	3204	8.2	168	23	197		40		80.4
Female	18	160	46	17.9688	2694	8.2	176	9	186		53		78.8
Female	18	166	63	22.8625	3360	8.8	175	13	182		48		79.4
Male	18	171	56	19.1512	4308	7.4	212	25.4		239		10	78.8
Male	18	173	55	18.3768	3605	7.6	201	11.5		317		4	57
Female	18	163	50	18.8189	3051	9.2	170	15	192		28		75.2
Female	21	160	47	18.3594	1811	10.4	151	11	201		20		54.9
Female	20	163	54	20.3244	2761	10.9	155	25	192		25		66.4
Female	19	164	48	17.8465	3279	9.5	168	21.6	184		46		74.8
Male	19	178	70	22.0932	4304	7.2	220	11.7		241		5	70.8
Male	19	187	89	25.4511	6407	7.4	222	20		261		3	70.1
Male	18	192	65	17.6324	4362	6.9	221	6		238		1	69.2
Male	19	179	74	23.0954	4727	6.9	201	9.9		240		6	73
Male	18	176	57	18.4013	3677	7.2	217	4.4		262		8	70
Female	18	172	50	16.901	3469	9.2	200	23	185		54		82.5
Male	19	180	55	16.9753	4132	7.2	251	10.2		255		4	67
Male	18	169	60	21.0077	3747	7.5	190	13.1		261		8	66.7
Female	18	158	44	17.6254	2107	9.3	153	28.1	184		43		76.3
Female	18	164	59	21.9363	3854	9.2	140	15.4	195		45		75.4
Female	18	159	50	19.7777	2523	9.9	139	11.6	181		0		62.5
Female	18	166	58	21.048	3171	9.8	164	25.4	185		47		78.8
Female	18	163	64	24.0882	2983	10.8	135	25.2	205		46		61.6
Female	19	164	45	16.7311	2649	8.7	200	17	234		51		78.3
Female	18	159	45	17.7999	2901	9.1	172	11.3	228		36		77.9
Female	19	165	55	20.202	3779	9.2	147	23.5	184		27		78.4
Female	18	169	70	24.5089	3772	9.1	145	4.2	216		16		59.4
Female	19	167	65	23.3067	4220	9.8	140	17.4	215		46		78.4
Female	18	174	55	18.1662	3093	10	146	-25	195		31		64
Male	19	180	59	18.2099	4371	7.4	203	24.8		254		6	71.9
Male	18	176	70	22.5981	4642	6.9	255	9.6		265		4	73
Male	18	175	64	20.898	4168	6.8	215	10.1		215		3	74.4
Female	18	175	64	20.898	3930	9.8	157	22.8	238		44		80.8
Female	18	151	53	23.2446	2853	9.7	135	13.8	198		47		70
Female	18	166	50	18.1449	3343	8.6	168	27.5	185		42		82.3
Female	18	172	65	21.9713	3184	9.7	154	3.2	184		31		55.6
Male	20	179	70	21.847	5247	7.1	254	23		266		5	76.4
Female	18	164	55	20.4491	3237	9.6	162	15.3	218		42		72.6
Female	18	161	50	19.2894	3304	9.3	143	1	216		35		63.3
Female	19	161	51	19.6752	4196	9.3	160	18.9	232		42		81.2
Female	20	162	55	20.9572	2685	13	115	23.9	189		28		55
Female	18	156	42	17.2584	2569	8.6	170	16	226		43		78.5
Female	19	164	48	17.8465	3839	8.7	190	16	211		46		86.1
Male	18	180	73	22.5309	4138	7.8	240	9		256		0	68.2
Female	19	156	52	21.3675	2895	9.2	170	18	239		42		77.8
Male	19	175	60	19.5918	4414	7.4	245	6		248		17	78.8
Female	18	170	52.5	18.1661	3486	9.1	200	13	212		52		86.4
Female	18	167	56	20.0796	2849	9.3	175	16	238		50		78.7
Female	18	164	55	20.4491	2765	9.1	165	17	184		44		77.1
Male	18	175	95	31.0204	4655	8.2	205	10		296		0	55.1
Female	18	168	57	20.1956	3423	9.7	145	16	205		26		73
Male	18	186	60	17.343	3958	8	220	6		261		0	62.7
Female	19	165	58	21.3039	2600	9	165	5	196		26		70.2
Male	18	185	60	17.531	1464	7.4	260	7		273		0	52.1
Female	19	167	62	22.231	3079	8.3	200	19	223		30		82.4
Female	19	164	56	20.8209	3666	9.5	165	20	181		38		79.2
Female	18	161	61.5	23.7259	3440	8.9	185	28	225		56		88.4
Female	18	156	43	17.6693	3614	8.7	170	20	185		30		82
Female	18	160	49	19.1406	2724	9.8	160	17	229		32		75.3
Female	18	158	54	21.6311	2669	9.3	165	9	185		43		74.6
Female	18	160	52	20.3125	2879	9.3	155	15	239		31		75
Male	18	180	61	18.8272	3774	7.9	190	10		253		0	61.9
Female	18	156	50.5	20.7512	3614	8.8	190	22	221		37		84.8
Female	18	157	49	19.8791	3092	9.6	165	21	209		45		75.7
Female	21	167	46	16.494	3543	9.4	165	18	232		35		77.2
Female	20	165	52	19.1001	2151	9.9	160	8	233		37		72.1
Male	18	180	75	23.1481	4900	7.4	215	-1		289		1	60.9
Female	19	172	65	21.9713	3558	9.7	170	19	216		35		82.2
Male	18	173	72	24.0569	5045	7.4	235	15		252		0	70.6
Female	18	157	50	20.2848	2829	9.6	150	12	234		32		73.2
Female	18	167	48	17.2111	4011	9.2	180	22	185		37		82.5
Male	19	185	60	17.531	3964	7.4	250	7		269		0	64.7
Female	18	162	50	19.052	3318	8.4	195	8	213		35		83.1
Male	23	175	62	20.2449	4681	7.2	255	5		249		12	77.8
Female	19	162	46	17.5278	3005	8	195	20.5	235		36		82.8
Female	19	171	67	22.913	4222	9.8	165	18	225		26		71.4
Female	19	160	40	15.625	3132	9	160	19.5	225		55		70.5
Female	18	163	50	18.8189	2684	9	155	21	184		35		76.1
Female	19	160	50	19.5312	2869	9	174	5.5	238		40		75.4
Female	19	161	51.5	19.8681	3426	9.6	152	9	195		44		76.6
Female	19	161	51	19.6752	3207	9.4	167	15	195		51		77.3
Female	18	158	48	19.2277	2886	8.8	176	12.5	183		53		79.2
Female	18	162	43	16.3847	2730	9.6	176	15	194		25		69.7
Female	18	158	47	18.8271	2759	9.1	145	17	182		32		73.1
Female	19	163	55	20.7008	3835	10.3	157	20	236		27		68.4
Female	18	165	64	23.5078	3132	9.7	185	19	183		46		78.6
Female	18	165	51	18.7328	2640	9.1	150	17.3	186		35		73.6
Female	18	164	54	20.0773	3451	9.1	165	24	199		41		81.3
Female	19	165	50	18.3655	4225	8.2	200	20.5	218		53		88
Female	18	165	45	16.5289	3615	9.3	153	25.5	221		33		79.1
Female	18	161	54	20.8325	3478	8.2	172	17	184		42		84.6
Female	18	161	42	16.2031	2559	9	179	21	195		44		74.2
Female	18	165	49	17.9982	2752	9.3	160	29	236		45		79.3
Male	18	171	48	16.4153	3167	7.3	199	10.3		228		4	62.6
Female	18	160	52	20.3125	3430	9.9	125	20	195		40		71.4
Female	18	164	53	19.7055	2785	10.4	145	21	185		35		69.4
Female	20	166	52	18.8707	3247	8	204	22.5	207		42		88.8
Female	19	160	46	17.9688	2682	11	155	20	216		37		61
Male	19	162	70	26.6728	3549	7.8	238	21		238		4	66.6
Female	18	167	55	19.721	2404	9.7	145	5	225		39		61.6
Female	18	164	51	18.9619	3946	8.9	180	16	181		50		82.9
Female	19	163	48	18.0662	3038	9.3	170	26.5	236		41		80.4
Male	19	169	58	20.3074	5732	7.6	240	22		206		17	88.4
Female	18	164	50	18.5901	3156	8.1	180	13.5	191		39		79.3
Female	19	166	55	19.9594	3445	8.4	180	22.5	189		36		90.4
Male	18	177	54	17.2364	4949	8.3	205	19		245		1	66.8
Male	19	175	57	18.6122	2459	7.3	210	12.5		242		20	69.1
Female	19	160	50	19.5312	3249	8.6	182	29	183		47		83.4
Female	19	158	47.5	19.0274	2478	10	152	20.4	233		49		75.3
Female	18	168	52	18.424	5912	9.2	145	24.3	214		48		82.5
Female	19	161	44	16.9747	2245	8.8	155	10.4	181		50		71.3
Male	18	182	65	19.6232	5283	7.6	226	17.5		247		7	76.4
Female	18	158	42	16.8242	2394	9.5	148	18.4	226		31		70.3
Female	19	154	49	20.6612	2681	9.7	165	19.5	189		38		75
Female	19	162	58	22.1003	2223	9.2	152	18.2	221		28		74.6
Male	19	174	67	22.1297	2951	7.7	225	12		318		5	58.1
Female	19	164	54	20.0773	3287	8.1	187	27.2	217		48		86.8
Female	18	158	62	24.8358	3022	8.9	150	13	206		24		68.2
Female	18	168	52.5	18.6012	2404	8.9	155	17.4	181		52		77.2
Male	19	174	60	19.8177	5331	7.7	243	13.5		256		8	77
Female	18	160	46	17.9688	2891	9.4	168	9.3	188		27		73.4
Female	18	162	50	19.052	3182	9.5	168	24.8	188		27		77.8
Female	18	153	39.5	16.8739	2622	9.6	180	15.3	229		40		74.2
Female	19	155	49	20.3954	3212	8.7	162	14.9	182		51		79.7
Female	19	157	45	18.2563	2992	8.2	181	25	195		30		86.6
Female	18	150	53	23.5556	3428	9.7	146	23.5	232		29		78.6
Female	19	158	43	17.2248	1609	9.5	151	14	208		40		61.6
Female	18	152	47	20.3428	2323	9.3	155	27.4	204		43		81.7
Female	19	162	50.5	19.2425	3185	9.5	158	17	189		30		75.8
Female	18	160	56	21.875	2758	9.1	178	27.3	206		33		77.3
Female	19	159	50	19.7777	2404	8.4	180	11.7	212		32		79
Male	19	176	62	20.0155	4260	7.4	262	16.6		182		6	79.2
Female	19	163	52	19.5717	3385	8.7	157	16	223		24		79.3
Female	18	160	47	18.3594	3278	8.9	170	13	217		47		81.8
Female	20	158	50	20.0288	2803	10.9	120	20	196		31		60
Female	18	170	58	20.0692	4017	8.5	190	28.2	223		34		86.9
Female	19	162	47	17.9089	4021	8.2	185	14.2	206		53		88.2
Female	18	160	45	17.5781	3216	9.7	156	26.4	199		49		78.9
Female	18	170	61	21.1073	4524	8.5	203	19	219		31		85.5
Female	18	160	45	17.5781	2514	9.2	152	2.7	186		26		66.5
Female	19	161	54	20.8325	2300	8.5	185	26.3	181		28		78.3
Female	19	163	53.2	20.0233	2636	8	203	9.5	223		38		81.9
Female	19	157	47.8	19.3923	3275	8.6	156	20	222		46		81.2
Female	18	173	55.8	18.6441	2984	9	201	27	198		48		81.8
Female	18	159	47.8	18.9075	3286	8.9	174	18	181		39		78.5
Male	19	174	56.3	18.5956	4285	7.1	239	8		243		0	70.7
Female	19	153	55.7	23.7943	3446	9.5	157	19.5	181		19		73.6
Female	19	160	52.8	20.625	3089	10.5	105	15.4	238		26		56.4
Female	18	164	56.9	21.1556	3327	8.3	183	15.6	223		42		83.5
Female	19	164	59.6	22.1594	3427	8.9	163	17.3	181		40		81
Male	19	177	64.8	20.6837	5085	8.7	254	16.3		226		6	76.2
Female	18	158	43.3	17.345	2541	9.4	137	16.5	185		30		71.3
Female	19	166	47.1	17.0925	2930	10.8	180	16.5	211		39		69.3
Female	18	176	51	16.4644	3319	8.3	204	9.5	185		16		72.4
Male	18	169	67.1	23.4936	3446	7.3	195	3.5		259		12	67.8
Female	18	161	44.6	17.2061	2932	9	173	15.7	184		50		78.8
Female	18	162	54.6	20.8048	3593	8	200	23	232		49		88.7
Female	18	165	53.3	19.5776	2480	9.3	158	12	235		25		72.2
Female	18	175	59.3	19.3633	3596	8.4	171	16	192		35		80.6
Female	18	158	55.6	22.2721	3013	10	123	13	217		21		59.4
Female	18	165	45.9	16.8595	3085	9.2	174	5	188		26		69.4
Female	18	163	50	18.8189	3348	9	144	14.5	232		44		77.1
Female	19	160	47.6	18.5938	2864	10.2	158	13.5	182		17		67.2
Male	18	182	64	19.3213	4020	7.8	192	0.5		259		2	57.3
Female	19	167	61.3	21.98	3123	7.9	150	10	229		49		79.7
Female	19	163	55.4	20.8514	3115	9	144	20	189		28		73.6
Female	18	168	60.6	21.4711	2796	9.3	182	18	233		29		70.1
Female	19	164	58.2	21.6389	2877	10.4	162	20	181		23		61
Female	19	159	49.4	19.5404	3322	9	194	13.5	185		36		79.4
Female	19	163	65	24.4646	3621	9.5	168	18.5	187		31		75.8
Female	18	168	53.6	18.9909	3290	8.5	150	19	207		31		75.2
Female	18	155	61.3	25.5151	2734	9.3	155	11.5	202		35		69.7
Female	19	168	53.6	18.9909	3157	9.3	124	11	221		30		64.8
Female	21	150	44.1	19.6	2293	9.3	142	11	233		29		63.4
Female	19	168	57.7	20.4436	3391	9	180	18	222		49		83.8
Female	19	160	52	20.3125	2915	8.5	195	24.4	238		46		83.6
Female	19	163	56	21.0772	2776	9.5	160	17.5	185		44		75.7
Female	18	158	55	22.0317	3423	9	205	14	182		52		93.1
Female	18	164	50	18.5901	2689	9.5	150	10.3	185		32		72.8
Female	18	156	48	19.7239	3034	9.5	195	8.6	197		40		76.6
Female	18	159	55	21.7555	3300	8.9	170	15.1	225		42		81.1
Female	18	150	40	17.7778	2633	11	150	19	201		26		61.6
Female	18	160	53	20.7031	2512	8.7	200	12.5	193		37		77.3
Male	18	200	76	19	6631	8	205	1.4		272		2	64
Female	18	160	45.5	17.7734	3158	10.2	175	17	195		35		75
Female	18	159	43	17.0088	2734	9.1	165	5.2	227		46		72.9
Male	18	172	57	19.2672	3361	7.7	210	13.7		261		4	65.6
Female	18	157	41	16.6335	3273	10.4	200	19.5	193		46		73.3
Female	18	165	52	19.1001	3763	9.5	175	15.5	184		31		79.4
Female	18	155	38	15.8169	3127	9.8	185	24.2	225		34		69.1
Female	18	160	50	19.5312	3138	12.5	160	15.6	180		10		41
Female	19	162	83.5	31.8168	3806	9.3	175	5.2	187		42		72.2
Female	19	166	53	19.2336	3632	9.4	170	18	207		29		77.2
Male	18	175	85	27.7551	6100	7	255	22		247		10	81
Female	18	160	47	18.3594	3077	9.7	170	7	202		37		73.2
Female	17	156	49	20.1348	2609	9.6	190	3.7	197		32		70.3
Female	18	164	73	27.1416	4146	9.7	140	13.7	221		32		56.8
Female	18	156	55	22.6003	2890	9.7	155	14.7	196		32		72.8
Female	18	155	47.5	19.7711	2958	9.6	140	9	208		36		68.7
Male	18	170	45	15.5709	3712	7.7	250	16.3		249		2	66.7
Female	18	156	45	18.4911	2853	11.7	150	16.4	233		25		52
Female	19	157	55	22.3133	3419	10.5	160	12.3	194		38		74.2
Female	18	154	47	19.8178	2938	9.3	155	23.8	223		40		79.3
Female	19	164	53	19.7055	3016	10.4	165	15.2	221		30		57.6
Female	18	175	66	21.551	3846	8.8	180	17	182		38		81.8
Female	19	151	44.5	19.5167	2868	9.8	170	26.5	180		46		78.8
Female	20	164	48.5	18.0324	3006	8.4	195	14.6	221		42		82.4
Female	20	160	47.5	18.5547	2109	9.4	160	16.7	183		21		69.5
Female	18	160	45	17.5781	2991	9	195	14	226		63		86.9
Female	19	163	50	18.8189	3700	8.5	188	19	219		34		84.9
Male	19	180	85	26.2346	5733	7.1	240	1		243		10	73.6
Female	18	158	44	17.6254	3279	9.3	170	25	239		34		80
Female	18	173	65	21.7181	3410	9.4	178	18	229		33		81.4
Female	18	159	46	18.1955	3345	10	170	9	183		26		74.9
Female	18	166	52	18.8707	3359	8.8	175	12	189		40		79.8
Female	18	160	45	17.5781	3026	8	192	26	181		65		92.9
Female	19	172	57	19.2672	2478	9	150	-5	180		47		67
Female	18	153	44	18.7962	2996	9.6	148	19	198		40		73.5
Female	18	167	49	17.5697	3165	9	170	9	234		44		78.8
Female	18	172	58	19.6052	3700	9.3	175	15	204		50		80.1
Female	19	163	44	16.5607	2502	8.4	175	2	234		50		70.4
Female	19	160	49	19.1406	1960	9.8	140	15	184		48		67.9
Female	18	160	55	21.4844	3209	7.9	175	28	181		45		84.5
Female	18	158	60	24.0346	3690	9.8	140	27	202		39		72.8
Male	18	168	64	22.6757	4376	8.7	170	11		245		0	56.8
Female	19	166	56	20.3223	3435	7.8	208	16	217		60		93.4
Male	18	176	66	21.3068	4780	7.2	250	15		261		11	78.2
Male	19	173	57	19.0451	4965	7.5	225	21		244		4	69.8
Female	18	158	42	16.8242	3040	8.7	172	10	232		46		76.4
Female	19	167	50	17.9282	3182	9.2	190	14	186		43		79.1
Female	19	156	41	16.8475	2217	9.3	160	21	195		32		70.5
Female	18	166	48	17.4191	2906	8.5	182	26	187		50		82.8
Female	18	164	54	20.0773	3012	9.1	180	18	231		42		79.8
Female	18	157	47	19.0677	2450	9.8	165	14	182		41		73.8
Female	19	163	55	20.7008	2792	10.1	140	15	185		48		64.7
Female	18	160	48	18.75	3707	9.9	182	22	192		43		80.5
Female	18	164	49	18.2183	3534	9.4	165	12	186		43		78.8
Female	19	162	43	16.3847	2852	10.1	178	16	231		50		74.7
Female	18	158	48	19.2277	2313	9	177	24	182		32		77.4
Female	21	165	55	20.202	3870	9.3	198	29	227		35		85.4
Female	18	173	50	16.7062	3092	10.1	140	0	187		18		55.4
Female	18	155	49	20.3954	3173	8.7	180	12	235		49		80.8
Female	19	165	51	18.7328	3609	9.6	160	26	209		38		79.4
Female	19	164	58	21.5645	2376	9.7	160	11	181		42		72.5
Female	19	160	51	19.9219	3426	9.6	155	22	185		48		79.9
Female	19	164	58	21.5645	1923	9.2	155	2	183		55		66.1
Female	19	163	45	16.937	3054	8.7	170	30	235		30		77.6
Female	18	163	53	19.9481	2515	8	180	6	226		34		78.7
Female	18	157	50	20.2848	2503	9.9	155	10	199		35		71.1
Female	18	163	47	17.6898	2956	9.6	160	14	193		45		75.1
Female	22	161	48	18.5178	3124	9.1	165	3	184		3		64.6
Female	20	163	46	17.3134	3457	9.4	140	19	181		45		76.8
Female	18	160	46	17.9688	2774	9.8	170	16	192		39		74.3
Male	19	174	55	18.1662	4383	8.1	210	7		259		3	66.2
Female	19	165	55	20.202	2833	8.4	170	15	209		35		81.2
Female	18	164	50	18.5901	3457	8.7	160	11	225		35		80.8
Male	21	174	60	19.8177	4886	7	245	2		198		0	76.3
Female	19	163	46	17.3134	2644	9.1	180	25	186		26		77.5
Female	19	157	60	24.3418	3562	10	150	16	215		30		68.2
Female	18	167	42	15.0597	2981	8.2	200	25	236		35		79.8
Female	18	159	56	22.151	3028	9.7	155	11	225		32		67.6
Male	18	183	60	17.9163	5534	7	230	18		259		7	77.8
Female	18	158	44	17.6254	2747	9.4	160	21	198		34		74.8
Female	18	161	54	20.8325	2651	9.4	160	10	185		29		72.8
Female	18	162	51	19.433	2847	9.7	165	19	189		35		75.2
Female	18	163	45	16.937	3215	8.7	180	3	227		42		73
Female	18	158	45	18.026	3362	9.4	162	20	225		60		85
Female	18	156	45	18.4911	2786	9	170	18	211		51		76
Female	19	156	46	18.902	3608	8.7	180	26	182		41		89.4
Female	18	160	45	17.5781	2534	9.1	160	25	235		35		77.6
Female	19	159	45	17.7999	3071	9.7	170	27	214		30		75.8
Female	20	158	52	20.83	2993	9.1	183	15	234		40		78.9
Female	19	160	55	21.4844	3308	8.9	155	14	184		47		80.7
Female	18	165	44	16.1616	2352	9.6	170	-5	229		28		56.5
Male	19	170	56	19.3772	4243	7.2	240	8		263		7	71.9
Female	18	162	56	21.3382	4213	9	160	24	235		34		82.1
Female	19	161	42	16.2031	2357	8.1	195	23	225		53		80.5
Female	19	170	53	18.3391	3806	9.7	170	22	186		30		79.3
Female	18	157	46	18.662	3393	9.5	151	6	232		41		77.5
Female	19	155	44	18.3143	2348	8.2	185	9	227		35		77.7
Female	18	164	55	20.4491	3350	8.7	170	20.5	185		26		79.7
Female	19	164	55	20.4491	2788	7	165	23	225		42		85.1
Female	18	160	49	19.1406	3708	8.6	185	14	236		48		83.2
Female	18	159	49	19.3821	2933	9.1	180	13	219		46		79.9
Female	18	172	75	25.3515	4384	10.2	140	6	183		43		70
Female	18	168	49	17.3611	3156	8.3	203	11	214		39		84.1
Female	19	165	48	17.6309	2938	9.5	170	13	191		34		74.9
Female	20	166	47	17.0562	2419	9.3	185	14.5	183		34		72.6
Female	18	170	75	25.9516	3708	9	165	19	237		27		77
Female	19	165	55	20.202	3934	9.6	170	23	184		36		80.8
Female	18	166	46	16.6933	2687	9.2	152	26.6	233		38		75.2
Female	19	163	54	20.3244	3385	8.7	160	25	204		34		80.1
Male	18	167	52	18.6453	4358	7	225	11		225		3	73.4
Female	19	162	67	25.5296	3321	8.9	170	13.4	195		22		71.7
Female	18	165	41	15.0597	2751	9	160	18.5	215		28		75.1
Female	18	155	52	21.6441	2625	8.9	160	19	227		42		78.4
Female	18	159	45	17.7999	3199	8.1	180	17.6	183		38		80.8
Female	19	158	51	20.4294	3331	9.8	170	12.7	231		29		76.9
Female	18	158	51	20.4294	3014	10.2	130	19	185		35		68.8
Female	18	160	51	19.9219	3121	9.4	150	5.5	238		26		71.4
Female	18	168	58	20.5499	2742	9.5	160	23.6	203		35		74.9
Female	17	166	67	24.3141	3427	10.6	155	30.4	204		20		67
Female	19	160	46	17.9688	2977	8.6	190	18.5	237		37		80
Male	18	170	57	19.7232	3960	7.1	245	15.5		218		18	83
Female	18	155	52	21.6441	2570	9.3	170	13	239		46		76.5
Male	20	170	55	19.0311	3876	7.2	223	14.4		223		5	72
Male	18	165	56	20.5693	3911	7.7	220	11		264		3	66.6
Female	18	155	45	18.7305	2530	9	180	17	218		38		78.5
Female	18	163	52	19.5717	2427	8.6	200	14	180		29		77.2
Female	19	164	54	20.0773	3218	8.8	200	23	219		43		84.2
Male	18	180	90	27.7778	4868	7.9	240	16		281		1	65.1
Female	19	150	38	16.8889	2211	10.1	180	22	182		49		73.2
Male	19	170	58	20.0692	4292	8.7	210	14		272		0	64.9
Female	18	157	45	18.2563	3223	10.5	165	9	237		48		73.8
Female	18	172	41	13.8588	3396	9.6	165	9	235		42		75
Female	19	159	45	17.7999	2202	8.8	185	16	182		58		80.2
Female	18	160	45	17.5781	2611	8.6	180	8	217		37		79
Female	19	163	52	19.5717	3097	10.7	150	17	189		48		69.6
Female	18	160	47	18.3594	3084	9.7	160	20	183		54		78.7
Female	19	155	40	16.6493	1537	9.7	175	15	238		30		61.2
Female	18	158	50	20.0288	2349	8.4	200	17	222		53		82.1
Female	18	164	50	18.5901	3006	11.1	145	19	194		40		64
Female	19	162	57	21.7193	3171	9.5	148	18	193		33		74.3
Female	18	153	43	18.369	2194	10.1	155	11	181		36		70.9
Male	18	180	63	19.4444	5815	7	240	16		228		9	82.4
Female	19	160	48	18.75	2213	10.1	155	16	186		26		70.6
Female	19	164	54	20.0773	3602	10.4	165	24	180		41		78.1
Female	19	166	51	18.5078	1578	9.9	160	12	184		47		65.2
Female	18	159	40	15.8222	2856	9.2	168	16	185		53		74.8
Female	18	162	61	23.2434	2175	8.9	150	16	228		22		71.1
Female	18	158	42	16.8242	3276	9.3	155	23	180		41		75.8
Female	18	150	38	16.8889	2607	8.8	160	19	216		45		77
Female	18	158	50	20.0288	2368	9.7	160	12	184		40		73.3
Female	19	155	40	16.6493	2633	9.7	170	24	214		41		77.1
Female	18	160	43	16.7969	2969	10.7	170	24	181		49		70.5
Female	18	156	43	17.6693	3910	9.5	170	22	218		58		86.3
Female	19	161	46	17.7462	3666	9.4	185	15	185		42		80.4
Female	18	155	53	22.0604	2984	9.7	160	18	186		36		75.3
Male	18	180	77	23.7654	3802	7.9	210	-10		271		0	57.9
Female	18	155	53	22.0604	3363	11.3	175	22	223		28		69.6
Female	19	157	49	19.8791	3845	10.7	137	21	205		11		61.9
Female	18	155	55	22.8928	3559	9.5	152	8	188		43		77.4
Female	18	160	46	17.9688	2183	9.5	180	27	237		50		79
Female	19	163	52	19.5717	2821	8.2	188	15	221		41		81.5
Female	19	158	52	20.83	2966	9.3	162	15	196		42		75.3
Female	18	157	48	19.4734	2693	8.5	182	9	224		48		73.8
Female	19	165	46	16.8962	3297	8.3	185	21	231		54		82
Female	18	163	47	17.6898	3436	8.5	178	7	181		40		81.2
Female	19	167	51	18.2868	1163	8.7	203	18	182		43		69.5
Male	19	168	68	24.093	4115	7.8	222	4		281		5	61.4
Female	18	169	64	22.4082	3647	9	202	16	199		32		81.1
Male	18	178	63	19.8839	4825	7.8	230	13		245		7	70.1
Female	19	147	41	18.9736	2380	9.7	155	16	239		32		73.1
Female	18	163	61	22.9591	3692	9.1	172	11	204		37		78.2
Female	18	158	46	18.4265	2835	9.3	172	-14	186		33		68.4
Male	20	173	51	17.0403	3866	7.8	237	11		304		6	61.6
Female	19	166	52	18.8707	3070	9.7	163	15	181		44		75.6
Female	19	158	47	18.8271	2537	8.2	165	16	219		47		79.7
Female	19	170	60	20.7612	3337	9	176	11	180		30		77.9
Female	19	162	47	17.9089	3473	8.1	203	15	184		41		86.1
Female	19	157	45	18.2563	2522	9.1	153	16	194		28		73.1
Female	18	159	53	20.9644	2846	9.2	168	20	181		40		68.8
Female	18	162	49	18.6709	2666	9.5	183	26	196		48		78.6
Female	18	168	53	18.7783	2727	8.9	182	8	187		43		76.7
Female	18	171	57	19.4932	2615	9.7	155	-10	228		35		60
Female	18	152	42	18.1787	2222	9.5	162	13	191		44		73.2
Male	20	178	68	21.4619	4299	7.6	227	15		214		8	76.9
Female	18	159	52	20.5688	2929	8.7	167	27	195		44		79.9
Female	19	155	54	22.4766	2367	8.7	175	23	185		42		79.5
Female	18	162	51	19.433	2616	9.7	160	4	214		36		67.6
Female	18	163	56	21.0772	1995	9	180	26	206		42		74.7
Female	18	171	49	16.7573	3120	8.3	185	33	182		40		78.2
Female	19	156	44	18.0802	2888	9	185	15	192		33		76.2
Female	18	156	51	20.9566	2861	8.7	195	21	223		42		82.7
Female	18	160	53	20.7031	2176	8.7	155	12	189		39		73.7
Female	19	156	42	17.2584	2622	8.5	180	21	189		39		78.9
Female	19	152	49	21.2084	3019	9.3	175	20	183		35		75.4
Female	18	166	54	19.5965	3335	9.4	185	20	237		66		89.9
Male	19	182	62	18.7175	5400	7.7	225	21		241		6	76.5
Female	19	157	53	21.5019	2915	9.6	170	16	205		33		73.5
Female	19	166	55	19.9594	4278	8.6	180	21	233		39		83.9
Male	18	165	45	16.5289	3742	7.2	215	5		243		12	69.1
Female	18	157	45	18.2563	2870	9.5	170	22.5	181		27		68.2
Female	20	155	48	19.9792	3003	8.7	170	20	192		37		78
Female	18	158	49	19.6283	2442	8.5	180	12	224		58		82.4
Female	19	165	50	18.3655	3562	8.9	175	20.5	222		48		84.4
Female	18	158	46	18.4265	2677	9.3	190	20	222		49		74.8
Female	19	142	45	22.317	1564	10.5	110	6	182		46		45
Female	18	161	45	17.3604	3410	8.9	165	15	185		40		81.4
Male	19	173	62	20.7157	4681	7.4	240	18		241		10	79
Male	18	172	69	23.3234	4198	7.2	220	10.5		234		1	70.5
Female	18	166	53	19.2336	2833	8.3	190	9	185		48		79.3
Female	18	154	45	18.9745	2232	9.4	165	16	236		36		74.2
Female	18	162	52	19.8141	2914	9.3	165	20	180		30		76.3
Female	18	155	55	22.8928	2115	8.7	170	16	204		19		68.9
Female	19	163	42	15.8079	2614	9	165	26	202		51		75.3
Female	19	160	50	19.5312	2887	7.2	135	16	180		32		68.4
Female	19	165	57	20.9366	3146	9	140	26	209		35		73.6
Female	18	166	55	19.9594	3350	10	155	19	181		35		68.7
Female	18	155	50	20.8117	2651	9.9	120	15	203		39		65.8
Female	20	153	43	18.369	2734	8.9	195	17	235		53		81.3
Female	18	163	46	17.3134	2887	8.7	180	10	239		40		69.4
Female	18	164	64	23.7954	3851	8.2	190	16	209		47		87.9
Female	18	153	53	22.6409	2916	10	150	11	223		46		68.7
Female	19	164	53	19.7055	3433	8.9	170	17	192		35		80
Female	18	160	55	21.4844	3295	9.2	170	22	236		40		79.6
Female	18	156	45	18.4911	2545	8.9	195	15	226		39		79.3
Female	18	156	40	16.4366	1746	9.3	175	22	223		35		58.9
Female	19	158	54	21.6311	2802	8.5	145	16	181		50		76.3
Female	18	160	45	17.5781	2741	9.2	180	12	189		41		76.1
Female	18	168	48	17.0068	3105	8.6	190	5	233		35		73.7
Female	18	162	58	22.1003	2999	10.2	143	5	203		37		66.5
Male	19	168	47	16.6525	3365	7.2	245	7		253		17	73.6
Male	18	175	57	18.6122	4649	7.4	234	7		284		3	66.6
Female	18	162	50	19.052	3082	8.9	180	25	229		41		82.1
Female	18	173	59	19.7133	4211	9	185	15	225		49		83.7
Female	18	158	51	20.4294	2873	8.5	165	21	222		41		80.7
Female	18	160	50	19.5312	3198	7.9	200	10	236		56		85.1
Female	18	168	62	21.9671	4049	8.7	210	17	239		34		84.4
Female	18	166	52	18.8707	3686	8.6	163	11	235		35		80.2
Male	19	173	61	20.3816	4499	6.9	240	11		242		5	75
Female	18	163	53	19.9481	2913	9.6	170	14	199		35		74.3
Female	19	158	49	19.6283	3033	8.6	173	16	197		48		85
Female	18	160	48	18.75	3584	8.4	190	-2	207		38		79.3
Female	18	157	53	21.5019	3097	8.8	180	4	185		34		73.4
Female	18	162	60	22.8624	2473	9.5	145	14	198		33		69.8
Female	18	162	50	19.052	3350	9.3	170	21	215		51		84.5
Female	18	160	52	20.3125	3198	8.8	190	16	227		35		80.8
Female	18	156	44	18.0802	3440	9.3	160	17	189		60		84.2
Female	18	159	63	24.9199	3835	8.9	183	20	224		48		81.8
Female	18	158	40	16.0231	2519	8.9	170	17	192		38		72.9
Female	19	158	46	18.4265	2710	8.1	195	20	209		42		84.7
Female	18	156	49	20.1348	3373	8.5	155	14	228		37		80.8
Female	19	162	43	16.3847	2391	8.6	180	10	211		40		70.9
Female	19	173	68	22.7204	4004	8.1	186	15	211		44		81
Female	18	158	55	22.0317	3266	9.8	177	19	187		30		76.5
Female	18	165	54	19.8347	3473	8.7	196	19	232		36		84.4
Female	19	160	45	17.5781	2746	9.7	120	20	235		42		69.7
Female	19	152	43	18.6115	2975	8.6	170	21	215		33		81.2
Female	17	163	57	21.4536	2948	9	190	23	181		35		79.8
Female	19	160	43	16.7969	2683	8.3	190	15	205		50		81
Male	19	180	60	18.5185	4392	6.9	255	7		214		6	78.4
Female	19	156	46	18.902	2703	9.2	155	7.5	183		46		74.9
Female	19	160	61	23.8281	3813	8.9	165	17.5	233		52		83.4
Female	18	163	48	18.0662	3849	8.1	165	11	216		60		88.4
Female	18	165	64	23.5078	2902	9.1	165	9	237		52		78.1
Female	19	170	56	19.3772	2948	8.9	185	23	183		32		77.1
Female	18	160	52	20.3125	4204	8.7	180	21.5	184		46		85.5
Male	18	175	55	17.9592	4185	8.5	210	9		234		10	73.3
Female	18	160	47	18.3594	3515	8.5	175	15	234		37		82.6
Female	19	163	54	20.3244	3372	9.9	145	1	195		45		67
Female	18	171	54	18.4672	3427	9.5	180	11	237		43		80.4
Female	19	155	50	20.8117	3494	9.2	160	24.5	219		28		76.3
Female	18	166	55	19.9594	4170	8.9	185	5	216		59		84.8
Female	18	165	50	18.3655	3435	8.7	160	6	224		34		80.6
Female	18	169	53	18.5568	2810	9.4	170	17.5	181		46		77.2
Male	19	185	60	17.531	5114	7.3	255	21		225		6	76.7
Female	18	161	58	22.3757	3316	9.1	160	9	238		33		77.3
Female	18	164	56	20.8209	3398	9.2	165	14	180		44		79.5
Female	18	165	58	21.3039	2849	10.2	140	24.5	216		40		68.3
Male	19	176	54	17.4329	4436	6.9	250	10		223		7	75.4
Female	19	165	58	21.3039	3305	8.9	160	7	225		41		78.9
Female	19	155	50	20.8117	3029	9.2	180	24	235		42		80.7
Female	19	159	42	16.6133	3493	8.5	175	21.5	229		58		85.3
Female	18	168	43	15.2353	2992	8.1	185	6	206		44		79.5
Female	18	154	55	23.1911	3385	9.2	170	15	184		15		72.1
Female	19	159	54.5	21.5577	3088	9.1	160	10.5	215		44		79.4
Female	18	163	64.5	24.2764	3030	8.9	165	10.5	236		35		73.8
Female	19	164	47	17.4747	3052	8.9	190	15	216		43		75.1
Female	19	165	54	19.8347	3331	8.4	175	21	237		30		81.4
Female	18	169	56	19.6072	3113	8.9	170	12	217		40		80.2
Female	18	172	57	19.2672	2973	8.7	180	28.5	219		24		80.7
Female	19	160	56.5	22.0703	3211	9.3	175	18	191		40		78.1
Female	19	155	43	17.898	2675	9.1	165	11	214		43		73.2
Female	18	160	49	19.1406	3073	9.4	150	7	237		51		74.9
Female	18	159	54	21.3599	3244	8.3	180	14	182		56		83.2
Female	19	164	52	19.3337	2798	9	190	16	189		39		77.6
Female	20	160	53	20.7031	3500	10.2	165	23	182		35		77.4
Female	18	158	42	16.8242	2300	10.4	195	5	183		46		64.9
Female	18	158	58	23.2335	4136	10.4	130	12	191		57		71.4
Female	18	163	42	15.8079	2826	9.4	160	23	204		34		72.2
Female	18	170	55	19.0311	2930	10.1	150	25	181		33		74.6
Male	18	173	60	20.0474	4602	6.9	250	11		217		7	79.8
Female	18	158	43	17.2248	2934	8.1	200	21	184		33		82.8
Female	18	158	45	18.026	2054	9.4	150	19	206		55		60.1
Female	18	159	51	20.1733	2892	9.3	155	13	189		40		75
Male	18	170	66	22.8374	4604	7.2	245	19		258		5	73
Female	19	172	52	17.5771	2862	8.9	175	26	182		41		79
Female	19	158	52	20.83	3289	9.4	150	17	183		42		76
Female	19	163	45	16.937	2379	8.6	180	7	227		45		74.3
Female	18	164	47	17.4747	3242	8.6	170	18	181		41		79.8
Female	18	170	57	19.7232	3456	10	160	20	181		31		77.8
Male	18	178	75	23.6713	4012	7.5	225	11		254		0	68.3
Female	18	155	41	17.0656	2851	9	190	24	184		48		78.2
Female	18	168	58	20.5499	3617	8.7	185	29	221		30		85.6
Male	17	166	49	17.782	3963	7.6	230	20		244		5	68.4
Female	17	165	53	19.4674	2744	8.8	195	17	207		30		76.3
Female	19	158	40	16.0231	3186	8.8	175	16	224		31		76.9
Female	18	165	56	20.5693	3371	10.1	145	23	188		37		75.7
Female	18	158	53	21.2306	2249	9	160	15	180		35		74
Female	20	152	42	18.1787	1905	8.9	170	13	209		42		68.5
Female	22	157	44	17.8506	3025	9.4	145	17	192		34		72.6
Female	17	162	49	18.6709	2831	9.3	170	25	229		42		80.3
Female	18	168	54	19.1327	2745	9	175	10	234		45		77.7
Female	18	165	57	20.9366	2818	9.8	170	20	206		22		70.8
Female	19	155	45	18.7305	2444	9.1	170	14	186		44		75.8
Female	18	155	48	19.9792	2679	11.6	150	16	186		31		48.6
Female	18	158	47	18.8271	2777	9.4	160	5.5	181		37		71.9
Female	18	162	46	17.5278	3536	8.8	175	20	228		41		83.4
Female	18	159	56	22.151	3062	10	152	15	234		35		67.4
Female	18	164	54	20.0773	3400	10.3	167	16	199		59		80.6
Female	19	163	56	21.0772	2933	9.3	163	17	203		31		74.3
Female	19	158	53	21.2306	3169	10.4	155	20.8	193		28		72.3
Male	19	180	64	19.7531	3970	7.3	213	2.7		257		0	66.1
Female	18	157	40	16.2278	2304	8.7	165	15	186		49		73.6
Female	19	161	57	21.9899	3207	9.3	157	4.3	184		47		73.5
Female	18	161	50	19.2894	3898	9.1	162	19	215		45		76.8
Female	18	160	71	27.7344	2847	8.9	182	8.2	203		39		72.4
Female	18	156	45	18.4911	2775	8.9	172	14	237		53		70.5
Female	19	162	48	18.2899	2832	9	155	14.7	183		40		76
Female	18	163	68	25.5937	3916	8.8	172	19.7	229		34		79.6
Female	18	156	41	16.8475	2117	9.4	156	16.5	193		31		68.7
Female	19	167	58	20.7967	3710	9.6	165	14	180		33		78.2
Female	19	163	45	16.937	3570	9.7	165	23	226		41		71.4
Female	18	165	59	21.6713	2642	8.4	210	20.5	213		52		85.4
Male	18	165	68	24.977	4920	8	203	14.5		308		0	60.6
Female	18	156	57.5	23.6275	3020	10.4	158	11	181		46		71.6
Male	18	180	58	17.9012	4379	7.7	213	14		241		0	69.8
Female	19	151	51	22.3674	3157	10	150	12	201		28		71
Female	19	159	44.5	17.6022	2707	9.9	165	18.5	187		37		74.5
Female	18	171	45	15.3894	2755	9.4	177	14.5	228		44		67.3
Female	19	158	46	18.4265	3502	8.3	175	23	223		42		86.2
Female	18	171	54	18.4672	3593	9.8	148	24.5	184		43		70.9
Female	18	168	60	21.2585	3539	9.9	150	13	196		39		75.2
Male	19	165	68	24.977	3807	7.7	198	0		332		0	49.3
Female	18	164	63	23.4236	3045	8.7	193	15.7	217		47		83.1
Female	18	155	44	18.3143	2682	10	168	10.5	199		46		73
Female	19	164	49	18.2183	3247	9	170	11	236		46		78.8
Female	18	165	58	21.3039	4139	9.5	174	15	202		31		77.4
Female	20	156	44	18.0802	2581	9.3	165	17.5	185		40		75.3
Female	19	158	41	16.4237	2709	11.1	158	19.8	237		29		53.7
Female	19	158	53	21.2306	3311	9.7	160	22.3	184		44		79.5
Male	19	173	51	17.0403	4882	7.9	200	14		244		16	73.8
Female	19	161	47	18.132	2831	8.2	165	23	197		41		85.6
Female	18	167	50	17.9282	3872	7.6	198	20	197		42		93.6
Female	19	162	53	20.1951	2275	8.6	184	24	181		47		88.3
Female	19	162	54	20.5761	4115	9.1	185	18	181		32		80.4
Female	18	167	55	19.721	2198	9	170	21.5	192		40		75.4
Female	19	157	51	20.6905	2955	8.9	160	19	182		46		76.9
Female	18	158	56	22.4323	3285	9.2	160	0	182		24		67.8
Female	18	161	52	20.061	3400	9.4	166	13	182		22		80.6
Female	19	160	56	21.875	2585	9.2	172	10	203		33		72.9
Female	18	160	48	18.75	3045	8.6	177	22	215		24		73.3
Male	19	172	53	17.9151	4862	9.2	240	4		237		0	66.9
Male	18	169	49	17.1563	4205	6.9	250	16		216		11	79.7
Female	18	161	52	20.061	3628	8.8	180	18	183		45		86.2
Female	18	155	50	20.8117	2849	9.9	170	23	217		30		78.8
Male	18	172	60	20.2812	4084	7.3	240	12		241		8	74.2
Female	18	161	48	18.5178	3491	8.6	160	19	217		35		83.6
Female	19	150	50	22.2222	3091	10	160	0	180		41		67.8
Female	18	160	45	17.5781	3221	8.7	170	14	214		27		80.4
Female	18	158	56	22.4323	3400	8.5	170	11	233		40		82
Female	18	156	56	23.0112	3656	8.8	164	17	185		27		80.4
Female	18	158	43	17.2248	2570	8.3	185	19	216		41		81.9
Female	19	160	51	19.9219	3607	9.1	168	16	233		36		81
Female	18	160	54	21.0938	3605	8.5	207	23	215		41		89
Male	19	168	90	31.8878	4064	6.9	230	17		302		7	62.2
Female	18	154	41	17.2879	2027	11	140	12	205		20		53.2
Female	18	168	50	17.7154	3400	8.1	176	15	212		43		85.4
Female	18	160	52	20.3125	3473	8.8	173	14	217		48		84.4
Female	18	165	52.5	19.2837	3557	8.8	175	13	182		40		81.2
Female	19	166	60	21.7738	3685	9.6	170	19	193		25		77
Male	20	167	54	19.3625	4544	7.6	210	11		294		19	72.8
Female	20	155	48	19.9792	3491	8.2	168	26	185		40		84.4
Female	18	160	40	15.625	2394	8.4	155	14	212		44		75.7
Female	18	150	40	17.7778	2513	9.5	170	20.7	228		45		78.2
Female	19	155	44	18.3143	4981	9.5	180	20.2	189		29		79.6
Male	18	183	56	16.7219	4404	7.1	240	10.9		236		13	76.6
Female	18	166	48	17.4191	3574	8.7	170	21.5	182		44		83.1
Female	18	157	60	24.3418	3217	10	180	21	228		43		69
Female	19	161	45	17.3604	3534	8.3	180	19.5	184		49		86.3
Female	19	157	49	19.8791	3173	8.8	165	25.3	221		30		81.3
Female	18	162	55	20.9572	3067	9.1	160	5.2	216		31		76.4
Female	18	164	48	17.8465	3164	8.4	195	18	214		38		84.3
Female	18	150	40	17.7778	2729	9.1	170	8.5	203		36		73.7
Female	18	166	46	16.6933	3134	9.6	170	15.6	197		44		72.8
Female	19	161	63	24.3046	3401	9.1	180	12.4	204		35		75.6
Female	18	163	62.5	23.5237	2832	9.8	155	1.5	195		31		65
Female	19	167	65	23.3067	3535	8.6	175	20.5	186		39		82
Female	19	159	50	19.7777	3096	9.1	180	15.3	221		44		80.4
Female	18	162	51	19.433	2704	9	151	8.4	191		39		73.5
Female	19	163	56	21.0772	3218	9.4	160	12.5	222		40		78.3
Female	19	154	43	18.1312	3268	8.1	200	26	201		60		93.8
Female	18	158	50	20.0288	2115	10.6	151	10.5	237		6		50.9
Male	19	172	55	18.5911	4981	7.2	215	7.5		256		17	79.7
Female	18	155	50	20.8117	1566	9.7	151	19.5	238		28		63.2
Female	18	156	41	16.8475	2766	9.4	165	27	184		42		75.5
Female	19	154	49	20.6612	2947	8.5	170	19.4	211		43		82.1
Female	18	166	49	17.782	2645	9.8	170	5.8	192		27		70.4
Male	18	172	65	21.9713	4716	7.5	220	14.8		254		6	72.2
Female	19	156	44	18.0802	2838	9.5	151	18.5	214		39		73
Female	18	155	53	22.0604	2775	9.8	151	15	214		32		70.7
Female	18	152	43	18.6115	2908	9.1	165	11.3	195		45		75.7
Male	19	172	51	17.239	3503	8.1	190	19		242		1	58.7
Male	19	171	54	18.4672	4392	7.4	245	4.1		257		3	69.2
Female	19	157	50	20.2848	3118	9	195	34	225		63		90
Female	18	162	40	15.2416	2372	8.9	155	7	181		40		69.9
Male	19	182	75	22.6422	4326	7.8	200	0		245		2	57.4
Female	21	169	75	26.2596	3660	8.3	190	11.5	212		31		81.7
Female	18	150	36	16	1775	10.1	150	14.5	184		50		59.5
Female	18	161	51	19.6752	3137	9.1	175	13	180		27		76.4
Female	18	163	53	19.9481	3147	8.4	170	18	204		36		83.6
Male	18	172	46	15.5489	3444	7.9	210	4.5		227		5	64.6
Female	18	174	55	18.1662	4172	8.6	175	13.5	233		50		83.5
Female	19	163	46	17.3134	2325	8.8	160	12.5	189		43		74.9
Female	18	160	45	17.5781	3338	8.5	180	15.5	226		39		82.1
Female	18	166	56	20.3223	3352	9.4	175	7.5	189		34		77.5
Female	18	163	76	28.6048	4264	9.1	175	18.5	229		31		75.8
Female	19	163	51	19.1953	3366	8.5	165	16	229		40		82
Female	18	165	62	22.7732	3065	7.8	190	7	222		42		82.1
Male	18	175	66	21.551	3636	7.3	200	25		248		1	68.4
Female	17	154	42	17.7096	2240	9.5	155	17	227		36		74.6
Female	18	170	66	22.8374	2575	9.1	175	11.5	204		44		74.9
Female	18	168	63	22.3214	2350	8.3	175	12.5	182		50		78.4
Female	18	172	75	25.3515	4207	8.5	185	5	181		36		76
Female	18	163	51	19.1953	3804	6.5	190	20	222		42		90.1
Female	18	160	46	17.9688	2730	9.4	170	8	194		41		74.1
Female	18	165	45	16.5289	2990	7.2	175	15	218		38		81.7
Male	18	176	51	16.4644	3352	7.3	205	6		242		13	70
Female	19	168	55	19.487	2089	7.7	195	7	202		35		82.8
Female	19	154	46	19.3962	2972	8.5	160	9	238		47		78.1
Female	19	154	47	19.8178	2449	9.3	165	9.5	202		50		73.7
Female	19	153	42	17.9418	2910	9.2	155	18.5	235		50		78
Female	19	162	63	24.0055	3616	9	175	20	193		35		77.4
Male	17	176	67	21.6296	5094	7.2	215	-4		221		2	67.8
Female	20	176	55	17.7557	4051	9	165	23	238		29		81.2
Female	20	162	51	19.433	3015	9.6	155	7.5	233		28		74
Female	19	170	58	20.0692	3422	8.7	198	19	184		55		87.7
Female	18	158	54	21.6311	3400	8.3	151	18	214		37		83.8
Female	19	153	41	17.5146	3000	9.2	172	16	189		35		76.6
Female	18	153	47	20.0777	2083	11	136	9	183		38		56.6
Female	18	161	56	21.6041	2779	8.6	155	22	234		28		77.4
Female	19	160	50	19.5312	2892	10	156	22	208		42		73.5
Female	19	160	53	20.7031	3100	8.1	175	9	183		40		82.4
Female	18	162	48	18.2899	2922	9.5	155	16	185		47		75.9
Female	18	163	53	19.9481	3154	8.3	166	6	232		49		80.5
Female	18	163	51	19.1953	2946	8.3	188	6	181		50		80.1
Female	18	158	58	23.2335	2214	9.3	155	10	191		40		72.4
Female	18	155	41	17.0656	2042	10.3	136	8	193		39		63
Male	18	169	54	18.9069	3818	7.2	228	18		240		2	70.5
Female	19	160	52	20.3125	2901	9.2	168	22	188		45		78
Female	19	163	47	17.6898	3475	9.6	160	12	237		35		78.2
Female	19	159	51	20.1733	2989	9.5	155	15	228		43		76.9
Male	19	179	63	19.6623	5244	7.5	230	10		222		2	75
Female	18	157	48	19.4734	2756	8.3	165	20	188		50		79.4
Female	18	161	58	22.3757	3757	9.3	160	14	239		42		80.2
Female	19	160	55	21.4844	3011	9.3	168	13	224		45		78.8
Male	19	175	60	19.5918	3801	7.7	221	15		242		0	67.3
Female	17	163	62	23.3355	4204	8.5	160	8	225		31		80.4
Female	18	160	47	18.3594	2835	8.5	168	15	182		40		78
Female	18	160	50	19.5312	3245	9.1	185	10	223		42		80.3
Female	18	165	65	23.8751	3798	9.5	177	18	187		40		80.4
Female	19	165	60	22.0386	3775	10	160	12	227		32		78
Male	18	175	70	22.8571	5312	7.3	240	12		247		9	79.2
Female	19	158	48	19.2277	2804	9	165	12	218		36		77.4
Male	19	175	55	17.9592	4435	7.7	260	15		222		6	75.9
Female	20	158	60	24.0346	3688	8.8	160	18	224		39		79.4
Female	19	158	65	26.0375	3884	8.5	206	11	209		42		84.3
Female	20	164	62	23.0518	3296	10.6	152	22.5	183		38		72.4
Female	18	162	53	20.1951	2966	8.5	169	9.6	235		56		80.7
Female	18	166	55	19.9594	2505	9.3	172	10.6	211		52		74.5
Female	19	158	42	16.8242	2320	9.1	160	1.3	196		43		63.7
Female	18	162	52	19.8141	2945	9.9	160	20.3	233		35		76.1
Female	18	168	50	17.7154	3013	8.7	180	8.9	204		45		77
Female	18	166	48	17.4191	3463	8.3	185	12.3	236		36		82.6
Female	21	155	42	17.4818	2024	9.9	158	16.2	182		25		57.6
Female	19	155	50	20.8117	2791	8.6	172	18	218		42		80.1
Female	19	163	45	16.937	2267	8.8	188	0	237		26		65.7
Female	19	163	53	19.9481	3014	9.4	148	8.7	181		19		67.6
Female	19	165	69	25.3444	3590	9.6	170	20.3	183		32		74
Female	17	158	48	19.2277	3072	8.8	176	22	205		27		76.3
Female	19	165	48	17.6309	2551	8.6	175	9.4	181		40		75.7
Female	18	160	50	19.5312	3367	9.6	168	15.7	212		39		76.1
Male	18	176	63	20.3383	4104	7.4	214	19		268		5	68.8
Female	19	175	75	24.4898	4085	9.5	167	13	238		25		65.6
Female	19	168	53	18.7783	3595	9.4	164	15.3	239		40		80
Female	18	163	60	22.5827	3684	8.7	163	13.4	238		37		80.8
Female	18	168	54	19.1327	3152	11	133	15.3	183		30		59.5
Female	19	161	48	18.5178	2932	9.6	168	17.5	234		32		76.3
Female	19	160	51	19.9219	3219	9.4	160	21.3	235		42		78.8
Female	19	166	57	20.6852	3768	8.1	165	27.6	183		48		82.8
Female	19	163	50	18.8189	4449	9.5	183	29.2	188		46		83.6
Female	19	158	53	21.2306	2834	8.1	177	10.1	203		37		76.4
Female	19	163	58	21.83	3759	9.6	150	10.5	183		35		76
Female	18	158	58	23.2335	2489	11.3	120	12	183		30		52.4
Female	20	157	44	17.8506	3107	8.7	198	15.7	198		41		79.2
Female	18	158	50	20.0288	3108	8.8	162	18	232		33		78
Female	20	160	64	25	3278	11	140	7.5	214		24		55
Female	17	168	50	17.7154	3113	8.3	175	10	221		56		83.2
Female	18	170	59	20.4152	3498	8.6	165	4	188		54		78.5
Female	18	172	75	25.3515	3976	10.5	155	15	196		37		59.4
Male	18	176	59	19.047	4671	6.6	220	-6		246		5	69.3
Male	19	165	56	20.5693	3587	7	235	13.5		243		10	76.8
Female	19	161	49	18.9036	3791	8.2	185	16	221		51		85.9
Male	18	175	55	17.9592	3994	6.1	235	9		231		4	75.1
Female	18	169	59	20.6575	3205	8.8	185	23	185		54		84.3
Male	19	175	59	19.2653	5121	7.1	230	21		281		11	77.9
Male	18	173	74	24.7252	4572	6.8	200	20.5		291		1	66.3
Female	18	165	49	17.9982	3100	8.8	175	19	186		46		79.4
Female	19	158	51	20.4294	3004	8.8	180	19	231		43		80.4
Female	19	163	53	19.9481	2919	9	160	13.5	226		49		78.8
Female	19	164	50.5	18.776	3784	8.3	180	18	236		48		84.4
Female	19	165	50	18.3655	3022	8.2	185	8.5	229		45		80.6
Male	19	187	56	16.0142	4788	7.3	215	15.5		232		1	69.4
Female	18	161	50	19.2894	2663	8.4	175	5	237		55		77.3
Female	18	163	51	19.1953	3353	7.9	205	26.5	225		39		88.5
Female	18	153	47	20.0777	2966	8.8	160	21	223		34		79.4
Female	18	172	57	19.2672	3440	8.4	190	9.5	224		44		84.3
Male	18	178	64	20.1995	4543	6.7	220	-2		224		3	69.2
Male	18	170	47	16.263	3761	7.4	215	-1		219		10	66.9
Female	19	158	48	19.2277	3492	8.8	165	10.5	228		45		81.6
Female	18	166	60	21.7738	3849	8.9	175	13	185		42		81
Female	18	160	43	16.7969	3006	8.3	175	17.5	216		28		78.4
Male	18	178	94	29.668	5700	7.8	210	26.5		342		0	58.4
Male	18	181	62	18.9249	4361	7	245	13.5		231		2	74.4
Female	18	167	48	17.2111	4494	8.3	165	15	185		40		81.4
Female	19	160	48	18.75	2102	9.9	140	7	226		39		61.3
Female	19	147	43	19.8991	2720	8.7	180	23	182		59		81.9
Female	18	177	67	21.3859	3489	9.8	155	12	233		35		70.6
Male	18	177	56	17.8748	4649	6.9	225	3		228		2	72.8
Male	18	174	60	19.8177	3639	7.2	210	3		282		3	61.8
Female	18	159	63	24.9199	2270	8.2	170	13	198		38		72.2
Male	18	167	60	21.5139	3990	7.3	210	12		244		0	68.7
Female	18	167	72	25.8166	4300	10.7	165	11	236		37		70.2
Female	18	160	56	21.875	3242	9	175	16	211		40		76.5
Male	18	179	73	22.7833	5421	6.9	245	20		226		0	79.9
Female	18	155	45	18.7305	2376	9.1	195	15	180		44		77.7
Female	18	158	52	20.83	2798	8.4	205	25	232		41		83.3
Male	18	168	58	20.5499	4012	7.3	225	23		238		2	71.9
Female	18	162	48	18.2899	3041	8.9	180	25	205		56		81.5
Female	18	160	55	21.4844	3267	8.2	180	17	219		50		77.7
Female	19	165	48	17.6309	3725	9.2	175	33	229		55		86.7
Male	18	178	75	23.6713	5140	6.8	240	11		241		15	85.2
Male	18	160	50	19.5312	4287	6.7	270	25		182		19	95.2
Female	19	162	60	22.8624	3182	11.2	150	13	221		25		62.8
Female	19	158	42	16.8242	2691	9.2	170	14	188		46		73.2
Male	18	175	56	18.2857	4110	7	220	15		258		2	70.4
Female	18	155	45	18.7305	2948	9.2	175	14	183		38		77.1
Male	18	180	75	23.1481	5165	7.6	220	16		293		2	67
Male	18	187	95	27.1669	5414	8.1	190	-12		245		0	57
Male	18	181	55	16.7883	4649	7.2	230	2		249		4	65
Female	18	163	64	24.0882	1992	10.8	130	24	183		27		48
Female	18	164	59	21.9363	3224	9.2	175	17	185		30		78.5
Female	19	164	53	19.7055	3543	9.5	180	8	208		21		73
Female	19	164	53	19.7055	2434	9.7	170	24	183		29		79.3
Male	18	190	72	19.9446	5263	6.8	260	7		221		3	79.9
Female	19	179	68	21.2228	4781	8.7	170	11	223		40		82.4
Male	19	181	85	25.9455	5122	8.7	215	14		309		0	61.4
Female	19	163	53	19.9481	2557	8.8	170	12	232		41		76.9
Female	19	168	51	18.0697	3458	8.6	180	17	218		34		83.4
Female	18	168	56	19.8413	3035	8.9	165	19	222		42		80.2
Male	18	178	77	24.3025	5562	7.3	225	20		249		0	71.5
Female	18	155	49	20.3954	3085	8	190	16	219		52		84.9
Female	19	163	88	33.1213	3282	9.8	155	11	188		36		58.4
Male	18	170	68.5	23.7024	4537	7.2	220	-2		266		0	61.6
Male	18	178	67	21.1463	5610	6.9	215	18		224		11	84.2
Female	19	161	50	19.2894	2776	9	160	10	184		41		75.5
Female	18	163	52	19.5717	3434	8.8	170	20	212		45		84.8
Male	18	176	85	27.4406	5566	7.8	225	15		269		2	67.8
Female	18	161	56	21.6041	3330	9.7	165	17	236		37		77.9
Female	19	168	55	19.487	2442	9.4	140	6	186		36		68.8
Female	18	163	44	16.5607	2842	9	190	24	239		57		80.6
Male	18	183	73	21.7982	5845	7.2	245	9		227		1	75.6
Female	20	163	53	19.9481	2972	8.2	210	17	226		46		83.9
Female	17	170	47	16.263	2126	9.1	180	4	180		20		63.9
Male	19	180	82	25.3086	4567	7.9	185	10		305		0	54.9
Female	18	163	53	19.9481	2000	9.3	165	16	224		35		75
Female	17	165	60	22.0386	3035	9.5	170	15	183		28		75.6
Female	18	163	47	17.6898	3134	8.7	190	20	225		34		81.1
Male	20	165	55	20.202	4386	6.9	225	20		241		5	75.7
Female	18	150	48	21.3333	2159	8.3	175	2	236		32		70.3
Male	19	175	75	24.4898	5298	8.4	175	-4		302		0	48.2
Female	18	164	53.8	20.003	2102	9.1	170	13.8	188		36		74.1
Female	19	155	43.9	18.2726	2410	8.6	160	8.9	217		48		78.4
Male	19	168	70.2	24.8724	4907	6.8	223	19.2		228		10	80.3
Female	18	175	66.9	21.8449	3775	10	180	12.9	229		17		66.2
Female	18	166	66.6	24.169	4147	8.3	205	19	206		40		80.3
Male	19	175	78	25.4694	5609	7	253	29		221		3	78
Male	18	172	74.2	25.0811	3405	7.3	208	13.2		244		0	64.4
Female	18	165	53.5	19.6511	3925	12.5	135	16.5	199		37		59.8
Female	18	168	51.8	18.3532	3085	8.2	180	3.3	185		34		74.8
Male	19	180	62.2	19.1975	4743	6.6	273	7.9		204		10	88.3
Female	19	164	55.2	20.5235	3485	8.6	173	14.1	184		46		77.8
Male	19	180	90.5	27.9321	5396	6.9	225	16.2		238		8	77.8
Female	18	165	51.1	18.7695	2715	9.8	173	19.6	182		27		74.7
Female	18	163	52.5	19.7599	2817	8.6	165	18	193		39		77
Male	18	170	55	19.0311	4417	7.6	230	15.2		223		10	78
Female	19	157	67.4	27.3439	3596	10.1	160	17.4	229		34		68.4
Female	19	163	68.6	25.8196	3086	9.2	170	13	184		26		72.6
Male	19	168	60.2	21.3294	3734	7.4	227	21.2		242		5	69.8
Female	18	170	72.2	24.9827	3677	9.2	155	21.6	206		47		76.1
Male	18	183	70	20.9024	4926	6.9	220	0.6		237		4	70.7
Male	18	174	68.7	22.6912	3861	8.1	225	5.5		272		0	64.8
Male	18	178	63.7	20.1048	3725	7.4	217	6.7		237		5	69.3
Female	19	170	57.8	20	3403	8.3	185	24	208		47		89.5
Female	18	159	50.3	19.8964	2528	9	165	20.9	239		25		75
Male	18	185	68.9	20.1315	5165	7.2	250	21.2		246		10	82.1
Male	17	173	61.2	20.4484	3866	7.8	227	16.4		227		8	74.4
Female	18	163	54.6	20.5503	3509	8.9	163	28.5	188		42		83.2
Female	19	150	41	18.2222	2674	8.6	182	15.7	224		40		79.8
Male	17	163	53.2	20.0233	3523	7.5	212	24.6		185		5	72
Male	18	166	62.5	22.6811	4539	7	230	14.4		231		5	74.6
Female	18	163	60.5	22.7709	3114	9.2	227	20.6	197		36		79.7
Female	18	165	49.2	18.0716	2032	9.2	165	6.5	222		36		73.8
Male	18	180	60.6	18.7037	4111	7.3	250	12.2		243		1	71.2
Male	18	180	55	16.9753	4157	7	265	0		264		10	69.8
Female	19	160	52	20.3125	3235	8.5	180	12	203		61		89
Male	18	169	76	26.6097	4791	7.4	220	5		245		3	66.6
Male	20	177	58	18.5132	4399	6.7	245	10.5		194		8	85.6
Female	19	164	67	24.9108	3450	9.1	160	17.5	232		42		78.4
Female	19	170	53	18.3391	3935	8.1	195	19	201		55		91.5
Male	18	175	63	20.5714	5612	7.1	255	22.5		233		5	78.8
Male	18	174	50	16.5147	4096	7.5	205	0		234		3	60.4
Male	18	172	82	27.7177	4937	7.7	205	4.5		243		0	64
Female	18	170	51	17.6471	2892	8.6	180	12	226		48		79.8
Female	18	162	53	20.1951	3745	9.1	150	25	188		39		80.1
Female	19	169	53	18.5568	3493	8.2	180	11.5	184		42		84.2
Male	19	178	54	17.0433	4550	6.8	225	-10		202		18	79
Female	18	170	43	14.8789	2842	8.1	170	7	213		57		79.6
Female	19	157	46	18.662	2884	8.7	165	5	193		53		75
Female	18	156	42	17.2584	2801	10.1	140	11.5	234		26		69.8
Male	18	168	51	18.0697	4413	7.4	210	8.5		248		7	71.4
Male	18	173	80	26.7299	4940	8	210	-1		241		1	60.9
Female	18	161	45	17.3604	2617	9	175	18	216		37		79.6
Female	18	157	46	18.662	2757	9.6	165	12.5	185		38		74.3
Female	18	168	45	15.9439	3491	8.9	175	18.5	227		35		79.6
Female	19	168	81	28.699	3617	10.1	145	20.5	184		30		69.2
Female	18	163	56	21.0772	3059	8.9	165	16.5	236		38		78.2
Male	18	172	72	24.3375	4298	7.7	210	2.5		252		4	62.1
Female	18	167	80	28.6851	4004	8.8	175	21	185		44		77.9
Male	19	173	51	17.0403	4580	7.8	220	6.5		247		10	72.2
Male	19	172	72	24.3375	4298	7.2	205	7		240		3	65.1
Male	18	172	62.5	21.1263	4567	6.9	240	11.5		246		4	74.3
Female	18	155	52	21.6441	2126	8.8	185	16	231		42		77.3
Male	18	174	55	18.1662	4447	8	220	6.5		251		5	68.6
Male	19	169	52	18.2066	4580	6.9	230	16		245		9	79.3
Female	18	156	45	18.4911	2999	8.5	165	12	185		43		78.7
Male	18	166	73	26.4915	4371	8	180	14.5		281		0	55.4
Male	19	188	92	26.0299	5100	7.5	250	13		228		1	72.6
Female	18	163	54	20.3244	3363	10.2	155	21	232		30		77.5
Female	19	163	52	19.5717	3315	8.9	180	17	234		40		81.3
Female	18	160	46	17.9688	2421	9.2	175	12	215		37		70.6
Female	18	161	51	19.6752	2439	9.3	165	12	213		48		72.8
Female	19	159	52	20.5688	3034	10.3	160	8	231		35		73.8
Male	18	173	70	23.3887	5297	8.2	200	10		245		1	68.4
Male	18	180	68	20.9877	4493	7.5	235	3		268		0	66.4
Male	18	175	55	17.9592	4137	7.3	230	3		233		10	74.8
Female	19	143	50	24.4511	3502	9.5	160	23	182		39		77.8
Male	19	178	63	19.8839	5414	7.3	245	12		222		10	82.4
Female	18	165	53	19.4674	3710	9.2	190	19	236		54		84.8
Male	18	165	49	17.9982	3610	7.2	235	23		227		11	79
Female	18	166	57	20.6852	2849	8.6	125	16	221		46		73
Male	18	178	60	18.937	4984	7.2	245	14		229		5	76.3
Female	18	165	50	18.3655	2802	9	170	9	185		49		78.1
Male	18	176	53	17.11	4445	7.5	250	14		242		10	75
Male	18	176	62	20.0155	5023	7.4	230	13		226		11	80.7
Female	18	167	58	20.7967	3532	10	160	14	236		33		77.6
Male	18	177	72	22.9819	5204	6.8	250	10		283		2	73.8
Female	18	168	53	18.7783	3203	9	180	19	219		35		80.8
Male	18	188	92	26.0299	6245	7.6	255	15		281		0	67.4
Female	19	159	50	19.7777	3153	9.1	175	20	235		30		78.9
Female	19	158	50	20.0288	2697	9.4	155	7	236		31		72.8
Female	18	162	49	18.6709	2472	8.8	190	12	216		32		78.9
Male	18	175	60	19.5918	4678	7.9	190	4		248		1	63.8
Female	19	172	52	17.5771	2315	8.6	190	15	196		27		75
Female	19	168	48	17.0068	3165	9	180	12	194		36		74.3
Male	19	175	55	17.9592	4177	7.7	210	12		265		1	66.6
Female	18	170	69	23.8754	3316	9.5	140	20	224		24		68.1
Male	18	180	65	20.0617	4637	6.8	200	7		232		9	77.3
Female	19	164	50	18.5901	3268	9.2	165	24	235		53		81.8
Female	18	163	58	21.83	3509	10.1	150	23	202		40		76.6
Male	18	180	73	22.5309	5749	7.7	230	7		259		1	71
Female	19	161	56	21.6041	4089	9.1	180	20	226		49		84.3
Male	18	171	62	21.2031	4542	6.9	235	22		227		10	82.8
Female	18	170	47	16.263	2767	7.5	190	1	217		45		76.4
Male	18	178	72	22.7244	5270	7.9	210	0		244		2	62.4
Female	18	164	49	18.2183	3111	10.1	160	14	237		44		75.8
Female	18	164	46	17.1029	3343	8.5	180	26	229		48		82.5
Male	19	170	51	17.6471	4154	6.7	240	9		228		10	78.8
Male	18	173	54	18.0427	4495	6.6	245	12		181		10	88.8
Female	18	164	52	19.3337	3767	8.2	165	22	214		55		87.8
Female	18	164	50	18.5901	3585	8.1	170	10	218		54		85.3
Male	18	172	64	21.6333	4809	7.2	240	6		255		6	73.1
Male	18	172	60	20.2812	5324	7.6	245	18		258		3	73.4
Male	19	180	83	25.6173	6179	8	230	22		271		0	69
Female	18	163	50	18.8189	1741	10.2	150	22	195		27		59.7
Female	19	166	55	19.9594	2484	10.2	155	18	191		30		71.2
Male	19	169	65	22.7583	4820	7.8	210	4		287		1	64.9
Male	18	177	76	24.2587	5207	7.3	230	19		259		3	70.4
Female	18	158	56	22.4323	3003	9.5	180	23	193		27		77
Male	18	170	57	19.7232	5096	6.6	240	15		216		20	92.2
Male	18	181	60	18.3145	5741	6.9	255	13		205		0	81.2
Male	18	177	68	21.7051	4916	7.3	230	27		268		0	73.1
Male	18	173	52	17.3745	3709	7.9	210	15		238		19	74.9
Male	18	177	81	25.8546	5319	8.7	235	3		235		1	66.8
Male	19	167	60	21.5139	6085	7.4	245	20.5		217		18	87
Male	19	180	80	24.6914	5502	7.1	230	24		202		5	79.5
Female	18	168	57	20.1956	4094	8.8	175	28	184		46		84.8
Female	19	170	48	16.609	3643	10.1	140	13.5	236		0		64.2
Female	18	165	50	18.3655	3436	7.9	200	19	206		55		91.5
Male	19	179	96.5	30.1177	6075	8.7	185	8.5		279		2	54.4
Male	19	177	68	21.7051	5319	7.7	215	13		255		0	71.4
Male	18	170	73	25.2595	4580	7.6	250	16.5		241		3	68.9
Male	19	178	65	20.5151	5475	7.2	250	9.5		223		4	76
Male	19	178	65	20.5151	6017	7.6	230	19		227		2	75.4
Female	18	168	46	16.2982	3234	9	155	6	188		20		68.3
Male	18	180	72	22.2222	5630	7.2	235	16		245		6	76.4
Female	18	158	46	18.4265	3579	10.5	165	21.5	185		33		75.9
Male	18	172	52	17.5771	4462	8.9	220	13.5		238		6	66.8
Female	18	166	59	21.4109	3747	10.8	140	20	229		34		61.8
Female	18	158	50	20.0288	3431	10.3	160	11.5	219		35		78.2
Male	18	180	81	25	5437	7.6	185	25.5		229		0	68
Female	19	163	51	19.1953	4018	9.5	190	15	223		42		82.9
Female	18	163	65	24.4646	4270	9.1	170	28	181		40		79.6
Female	18	160	45	17.5781	6104	9	165	21	238		52		83.5
Female	19	163	47	17.6898	3677	9.3	165	18	231		50		82.3
Male	18	175	67	21.8776	5533	7.5	230	21.5		218		2	77.2
Female	18	165	50	18.3655	2540	10.1	150	12	223		26		71.7
Female	19	158	54	21.6311	3768	10.9	165	24	185		39		74.7
Female	18	168	60	21.2585	3734	8.8	155	20	184		50		83.5
Female	18	160	46	17.9688	3265	7.6	205	12	201		53		91
Female	19	166	54	19.5965	3291	8.3	188	8	218		52		83.5
Female	19	161	58	22.3757	3713	8.5	190	20	209		19		82.1
Male	19	170	56	19.3772	4761	7.1	230	14		223		17	82.8
Male	18	181	72	21.9774	5494	7	230	2		219		7	77
Female	18	164	52	19.3337	3425	7.7	195	12	207		41		89.2
Male	18	175	65	21.2245	4613	6.9	200	3		227		5	71.3
Male	19	175	76	24.8163	4248	7.3	225	21		264		0	67
Male	18	171	55	18.8092	5236	7.2	240	20		221		6	79.7
Male	18	178	82	25.8806	5766	7.8	195	14		276		0	61.8
Male	18	185	84	24.5435	4767	7.3	205	12		276		0	62.4
Female	19	162	50	19.052	3429	7.6	200	19	188		58		99
Male	18	180	75	23.1481	4852	8.1	200	3		266		0	63.9
Male	18	179	76	23.7196	5054	7.5	220	16		245		0	73.4
Female	19	165	55	20.202	3512	8.5	155	10	209		44		84.2
Female	18	152	45	19.4771	2748	9.8	165	19	209		52		80.7
Male	18	185	83	24.2513	7097	6.8	240	14		222		12	83.8
Male	19	175	56	18.2857	4980	7.3	190	-5		246		0	60.9
Female	18	163	62	23.3355	3666	8.3	158	21	225		39		83.7
Male	18	165	57	20.9366	3536	7.1	230	10		185		15	77.9
Female	18	168	65	23.03	3638	8.3	155	4	198		31		74.8
Female	19	150	60	26.6667	2301	9.3	145	1	234		33		61.7
Female	19	155	47	19.563	3067	9.1	185	18	224		29		79.4
Male	18	178	62	19.5682	4079	7.3	235	6		221		6	73.4
Male	18	181	60	18.3145	6091	7.3	205	20		211		8	80.1
Male	18	169	60	21.0077	4188	7.2	230	17		245		8	75.1
Female	20	163	53	19.9481	3858	10.4	150	15	185		35		73
Male	18	175	62	20.2449	4258	7.7	240	6.5		296		2	63.5
Female	18	167	58	20.7967	3005	8.8	185	23.5	223		44		82.6
Female	19	160	45	17.5781	3233	8.8	195	22	217		50		85.5
Female	19	157	60	24.3418	2604	10.2	155	18	202		34		68.4
Male	18	169	71	24.8591	4937	7.6	235	25		263		5	71.7
Male	18	175	60	19.5918	4839	7.6	240	1.5		221		15	77.9
Female	18	172	56	18.9292	3720	9.3	190	27.5	228		46		86.1
Female	18	158	58	23.2335	3244	8.9	160	24	181		37		80
Male	18	177	61	19.4708	4052	7.3	240	7.5		244		2	69.7
Female	18	165	58	21.3039	3289	9.5	160	14.5	211		50		75.7
Male	18	178	73	23.04	4892	8.6	160	-3		245		0	55.3
Male	23	179	58	18.1018	4906	7.9	210	11		248		2	69.5
Male	19	175	59	19.2653	4737	7.6	260	24		246		10	80.5
Male	18	178	62	19.5682	4503	7.9	240	14.5		233		3	71.2
Male	18	176	65	20.984	4587	7.4	230	1.5		244		3	63
Male	18	179	58	18.1018	5430	7.1	255	19.5		246		2	76.5
Female	18	171	56	19.1512	3559	9	180	26.8	191		37		82.8
Female	19	167	50	17.9282	3445	9.6	150	19	195		44		77.2
Male	18	161	56	21.6041	4439	7.3	210	12.5		245		3	69.8
Female	18	165	70	25.7117	3767	10.6	145	15.5	214		27		52.4
Male	18	170	59	20.4152	4404	6.9	240	17		227		5	77
Male	19	175	61	19.9184	4216	7.6	235	6		255		5	69.1
Female	18	152	36	15.5817	2092	8.6	175	22	236		50		75.6
Female	19	158	52	20.83	3170	8.1	200	21.5	193		42		82.4
Male	19	171	55	18.8092	4031	9	255	5.1		243		15	74.3
Female	18	163	51	19.1953	3723	9	180	15	197		50		81.1
Female	17	156	59	24.2439	3403	9.1	150	17	187		30		74.4
Male	18	163	51	19.1953	4147	7.8	225	12.8		272		3	66.8
Female	18	177	51.6	16.4704	3533	8.9	195	-1	184		34		72
Male	18	171	64.8	22.1607	4577	7	205	11		258		12	76.3
Female	18	160.5	47	18.2452	3363	9.5	172	11.1	192		45		78.3
Male	19	174	55.8	18.4304	4368	7.6	245	11		265		10	75
Female	18	166	45.3	16.4393	3211	10.2	172	8	239		36		72.2
Female	19	171.5	54.6	18.5637	3833	10.9	188	25	180		34		75.2
Male	19	169.5	83.2	28.959	4234	8.1	222	15.6		301		0	56.9
Female	18	163	49.3	18.5555	3230	8.6	170	-1	183		59		79.2
Female	18	162	55.1	20.9953	3442	9	195	20.1	205		51		82.3
Male	18	176	77	24.858	4951	7.5	210	12		306		1	62.5
Female	18	156	50.5	20.7512	3608	8.8	176	21.5	236		36		82.7
Male	18	167	76	27.2509	4278	7.5	202	12.3		255		3	63.3
Male	18	167	81	29.0437	5321	7.6	220	18.2		274		2	63.4
Female	18	162.5	73.8	27.9479	3256	10.1	155	14.2	214		28		68.8
Female	18	158	43	17.2248	2623	10.1	170	18.1	214		26		71.2
Male	19	175	61.1	19.951	3936	7	245	10		307		3	65.4
Male	19	169	56.7	19.8522	4403	6.8	250	5		252		10	79.6
Male	19	175	52	16.9796	4742	7.2	237	10		266		11	73.3
Female	18	172	53.2	17.9827	3502	8.9	167	-12	219		40		75.2
Male	19	173	54	18.0427	4499	8	235	0.9		306		2	59.2
Female	19	163.5	60	22.4448	2717	10.6	130	16	235		40		64.7
Male	19	169	79	27.6601	4271	8	180	3.3		314		0	48.7
Female	18	166	43.6	15.8223	2925	10.1	155	2	228		40		66.3
Male	18	165	55	20.202	3998	7.3	223	18.5		266		13	75.9
Male	19	171	64.3	21.9897	4548	7	256	25.2		244		10	82.5
Female	19	165	52.1	19.1368	3106	10.2	160	25	187		35		75.9
Female	19	163	50	18.8189	2899	8.8	176	2.5	233		33		71.6
Female	18	163	57	21.4536	3713	8.5	182	14.5	186		42		82.4
Female	18	162	48	18.2899	2849	9.1	172	14	180		44		77.6
Female	19	161	48	18.5178	2690	9.6	160	22.5	182		51		77.5
Male	18	177	57	18.194	4565	6.7	255	16.5		204		6	83.5
Male	18	169	65	22.7583	4503	7.2	252	12		237		18	81.9
Female	18	158	50	20.0288	2928	8.9	190	18	181		48		80.2
Female	18	145	42	19.9762	2433	9.1	172	21	184		42		79.1
Female	18	163	55	20.7008	2715	8.2	170	11.5	223		58		83.1
Male	18	179	89	27.7769	3000	7.6	198	4.5		247		0	58.3
Male	18	182	64	19.3213	5296	7	245	18.5		231		5	79
Female	18	170	55	19.0311	3112	9.1	168	14	207		24		73
Male	19	172	53	17.9151	4313	7.3	210	17		261		2	69.2
Female	17	160	71	27.7344	3462	9.7	155	13	184		33		74.4
Male	19	170	65	22.4913	4822	7.4	220	9.5		242		0	71.5
Female	19	157	46	18.662	2945	8.9	160	12	184		39		78.1
Male	18	158	50	20.0288	3353	8.2	168	4.5		284		0	54.2
Male	19	182	71	21.4346	4994	7	268	15		184		3	79.3
Male	19	177	73	23.3011	5959	6.7	257	22.5		197		3	87.5
Male	18	178	54	17.0433	3795	7.5	205	7		236		5	64.9
Male	19	172	45	15.2109	3540	8	245	16.5		242		2	64.3
Female	18	161	42	16.2031	3087	7.9	205	19	219		55		84
Male	18	183	63	18.8121	3911	7.2	255	12.5		225		5	73.2
Male	18	179	90	28.089	5655	7.6	225	18		266		0	66
Female	19	164	51	18.9619	2882	9.1	162	10	228		32		68.6
Female	18	160	54	21.0938	3601	8.6	197	22	231		46		85.9
Male	18	173	99	33.0783	5161	8.3	178	7		287		0	54
Male	18	181	71	21.6721	4891	7.5	235	28		274		0	70.9
Female	19	165	45	16.5289	3388	9.4	165	18	225		49		78.5
Female	19	156	47.5	19.5184	2550	10	177	25	218		46		79
Female	19	170	54	18.6851	2780	9.4	190	7	184		42		77.8
Female	19	163	53	19.9481	2763	9.4	172	12	185		50		66.4
Male	18	170	56	19.3772	2497	7.2	235	4.5		249		6	62.4
Male	18	175	66	21.551	5049	7.2	245	15.5		276		0	71
Male	18	176	60	19.3698	4373	7.7	235	7.5		259		7	71.2
Male	19	173	60	20.0474	4352	7	250	7.5		281		2	68.4
Male	19	172	68	22.9854	4944	7.7	215	6.5		273		5	67.7
Male	19	180	65	20.0617	4663	7.5	255	13.5		244		2	68.3
Female	18	170	59	20.4152	3635	9.3	185	4.5	231		36		78.2
Female	20	165	53	19.4674	6644	8.7	197	25	185		30		85.3
Female	18	160	58	22.6562	2992	11.3	145	20.5	187		36		51.7
Male	18	175	47	15.3469	3052	7.8	235	3.5		258		2	58.9
Female	19	168	58	20.5499	3079	9.1	165	17.5	216		47		80.8
Male	19	167	55	19.721	5232	8.3	195	12		242		2	68
Male	19	181	82	25.0298	4440	8.2	200	10		244		0	58.4
Female	18	163	56	21.0772	3892	9.2	170	24	188		48		82.7
Male	19	178	60	18.937	5049	8.3	205	9		276		8	69.2
Female	18	160	50	19.5312	3276	8.7	175	19.5	186		54		82
Male	19	184	62	18.3129	5635	7.1	270	10		243		5	75.3
Female	18	158	46	18.4265	3780	9.4	185	14.5	216		45		83.6
Female	18	156	46	18.902	3708	9.4	175	20	186		55		82.7
Female	18	158	52	20.83	2963	9.3	165	5	218		55		77
Female	18	154	49	20.6612	2944	10.9	140	18.5	194		31		63.5
Female	18	158	47	18.8271	3055	9.8	162	11	192		45		74.4
Male	18	181	56	17.0935	5332	7.8	225	5.5		263		12	73.6
Male	18	171	65	22.2291	4478	8.6	200	9		296		0	58.4
Female	19	158	45	18.026	4176	8.1	212	10.5	205		38		87.8
Male	18	160	54	21.0938	3457	7.6	223	10		264		5	66.2
Male	18	176	66	21.3068	5048	8.6	203	25		294		0	65.8
Female	18	163	49	18.4425	2773	10.7	125	13.3	191		34		61.5
Male	18	178	80	25.2493	5563	7.4	170	12.8		274		1	59.4
Male	19	172	52.5	17.7461	4942	6.9	208	13.6		261		9	75.5
Female	18	161	65	25.0762	3986	8.4	180	9	235		29		77.8
Male	18	175	72	23.5102	5331	7.2	230	14		480		1	60
Male	18	177	66	21.0667	5053	7.2	250	12.3		248		9	79.4
Female	18	168	51	18.0697	3655	9.3	172	20.1	238		46		82.2
Male	18	172	55	18.5911	4065	7.8	215	10		252		3	67.4
Female	19	164	56	20.8209	2983	9.1	168	23.5	181		44		79.3
Male	18	173	57.5	19.2121	4404	7.4	208	23		233		6	74
Male	19	176	65	20.984	3924	7.2	235	12		243		7	72.6
Female	18	162	46	17.5278	2587	8.7	152	22	222		34		78
Female	18	157	45	18.2563	2650	10.1	153	8.8	187		0		64.6
Male	18	175	63	20.5714	3867	8.1	193	14		268		0	62.2
Male	18	185	65	18.992	4727	6.8	245	11.5		218		10	83.5
Male	18	170	72	24.9135	4521	7.3	197	17.5		254		4	63.6
Male	18	175	52	16.9796	3831	8.1	206	14		286		3	59.2
Male	18	178	49	15.4652	4691	7.4	196	4.3		246		1	63
Female	18	163	50	18.8189	3237	8.4	184	22	224		48		83.8
Female	18	162	48	18.2899	2551	8.8	190	18.1	188		38		77.8
Male	18	186	73	21.1007	5163	7.1	247	27.5		223		14	87
Female	17	167	58	20.7967	3675	9.2	133	15	234		40		75.8
Male	18	178	67	21.1463	5383	7.2	200	16		229		6	74.4
Female	19	168	50	17.7154	3061	7.8	198	26	184		57		89
Male	18	164	50.5	18.776	4364	7.2	218	20.5		242		17	79.3
Female	19	168	59	20.9042	3521	9.6	140	11	239		37		74.6
Female	18	167	47	16.8525	3090	9.6	152	14.3	186		31		70.8
Female	18	167	48	17.2111	2495	8.4	181	13	225		39		78.6
Female	19	150	54	24	3184	9.2	172	20	215		44		71.9
Male	18	172	62	20.9573	3852	7.2	215	17.2		262		3	68.2
Male	19	176	60	19.3698	5150	7.2	205	13		259		2	70.6
Female	17	172	54	18.2531	3505	8.6	186	24.6	217		41		87.1
Female	18	153	52	22.2137	2879	9.8	145	20	211		45		71
Male	18	170	70	24.2215	3466	7.8	200	10		253		0	60.3
Male	19	167	60	21.5139	4414	7.6	210	5		239		0	68.2
Male	19	170	66	22.8374	3671	7.5	195	12		263		6	64.8
Female	18	163	65	24.4646	3879	9.5	150	15	182		33		72.2
Male	19	178	69	21.7776	5179	7.6	235	5		256		0	71.2
Female	19	155	45	18.7305	1819	7.7	190	20	234		49		74.7
Female	19	156	51	20.9566	2096	8.7	160	22	192		54		77.4
Female	18	166	49	17.782	2316	9.5	150	10	188		45		71.9
Female	19	160	65	25.3906	3657	9	150	13	187		42		75
Male	18	175	62.5	20.4082	4874	7.1	240	12		258		4	71.9
Male	19	175	67	21.8776	5269	7.3	210	9		259		3	71
Female	19	160	48	18.75	2456	9.2	160	9	181		45		73.6
Female	19	163	44	16.5607	3555	12	145	31	192		20		48
Male	18	180	80	24.6914	5702	9	160	4		244		0	55
Female	19	168	61	21.6128	3628	9.7	170	12	188		25		76.2
Male	19	185	130	37.9839	6611	8.4	230	11		245		0	61.2
Male	18	173	70	23.3887	3660	8.3	210	12		277		0	61.8
Male	19	183	96	28.6661	5627	7.6	220	16		268		0	65
Female	18	160	47	18.3594	2728	10.2	140	10	186		47		69.7
Female	18	155	45	18.7305	3620	8.6	170	23	217		47		86.4
Male	20	176	62	20.0155	5077	7.6	250	-1		228		30	89
Female	19	160	50	19.5312	3111	9.3	155	20	227		43		78.4
Male	18	171	57	19.4932	4630	6.9	230	9		239		3	73.8
Male	19	174	60	19.8177	4120	7.1	250	18		227		10	80
Female	18	158	50	20.0288	3348	9	195	15	183		46		81.5
Male	20	170	72	24.9135	3800	7.6	240	3		252		5	64.5
Male	19	178	62	19.5682	3494	7.1	230	8		185		5	70.7
Male	18	178	76	23.9869	4982	7.9	160	-2		245		0	54.6
Female	18	168	64	22.6757	4194	9.5	175	16	180		32		79.6
Male	18	176	70	22.5981	5635	7.5	245	15		211		8	81.6
Male	19	168	48	17.0068	4468	7.1	225	6		185		7	71.2
Female	18	162	49	18.6709	3396	8	195	17	181		58		94.8
Male	18	172	80	27.0416	4200	7.8	190	9		258		7	62.5
Male	18	176	58	18.7242	4667	7	240	16		211		4	77
Female	18	160	55	21.4844	3465	8.9	150	24	225		35		81.7
Male	18	180	55	16.9753	3957	7.4	225	8		234		0	66.5
Male	18	177	79	25.2163	5899	8.2	210	6		238		0	67.2
Male	18	176	64	20.6612	4238	7.4	180	-3		231		9	62.1
Female	18	163	46	17.3134	3396	8.4	195	16	238		42		83.6
Male	18	179	60	18.726	5137	7.3	240	12		229		7	78.4
Male	19	173	54	18.0427	6182	7.2	250	1		209		7	76.6
Female	18	162	51	19.433	3621	9.6	140	16	198		35		73.6
Female	19	158	54	21.6311	3632	9.5	170	14	183		52		85
Female	19	168	50	17.7154	3302	8.1	175	10	188		49		81.2
Female	18	164	53	19.7055	4965	8.5	160	19	186		36		81.2
Female	19	166	52	18.8707	3627	9.2	135	12	189		40		74.2
Female	19	164	60	22.3081	3206	9	180	13	192		44		78.3
Male	18	168	52	18.424	3775	6.9	210	15		209		0	74.1
Male	18	168	64	22.6757	4715	7.6	225	19		238		14	79.3
Female	19	165	52	19.1001	2886	9.6	170	6	189		35		73.6
Male	18	176	66	21.3068	4975	6.9	240	13		217		6	80.1
Male	18	165	58	21.3039	4400	7.6	225	19		255		0	69.8
Female	18	175	65	21.2245	4321	9.3	175	27	238		36		83.4
Female	17	168	55	19.487	4271	9.2	190	19	227		28		82.3
Male	19	168	68	24.093	4093	9	160	0		312		0	45.4
Male	18	181	59	18.0092	4321	7.1	225	10		202		7	78.6
Male	18	170	53	18.3391	5054	7.7	245	7		233		4	73.8
Female	18	160	45	17.5781	2769	9.2	170	15.5	232		53		78.9
Male	18	168	63	22.3214	3232	7.6	225	9.5		247		5	67.7
Female	18	162	85	32.3884	3483	9.6	185	10.3	187		39		73
Male	19	179	60	18.726	4612	7.3	260	12.5		226		10	80.7
Female	19	156	58.5	24.0385	2888	10.1	161	26	229		45		75.8
Male	18	181	60	18.3145	4552	7.1	270	20		216		12	84.5
Female	18	167	63	22.5896	3664	9.4	152	6	223		48		79.6
Male	18	180	67	20.679	4568	8	223	11		242		3	69.8
Female	19	162	42	16.0037	2567	9.7	175	24	180		39		74.4
Male	19	174	55	18.1662	6176	7.5	250	13.5		214		1	77.6
Female	18	172	60	20.2812	4012	10.2	152	4.7	192		41		73
Female	18	155	48	19.9792	3331	9.6	177	24	232		55		83.5
Male	17	182	65	19.6232	4583	7.7	193	8		267		0	64.5
Male	19	171	55	18.8092	4404	8	270	10		248		10	76.9
Male	18	173	77	25.7276	5149	8	199	15.7		241		0	66.2
Female	18	163	48	18.0662	2709	9.5	162	26.5	235		51		79.6
Male	18	166	53	19.2336	4047	7.7	225	11.5		300		10	68.7
Male	18	175	64	20.898	5065	7.1	230	4.5		223		3	74.6
Female	18	162	49	18.6709	2969	9.1	153	18	226		41		77.9
Female	18	173	54	18.0427	4132	9.4	180	16	185		32		80.6
Male	18	181	91	27.7769	5157	8.4	198	10.5		254		0	64.2
Male	18	171	59	20.1771	3830	8.8	192	9.5		302		4	55
Male	19	179	85	26.5285	5149	8.3	220	1		243		0	64.2
Female	17	161	54	20.8325	3610	9.8	185	18	231		0		73.8
Female	17	162	55	20.9572	3054	9.2	193	8.5	233		0		70.9
Female	18	168	59	20.9042	4424	10	145	5	192		54		73.5
Male	19	178	85	26.8274	5488	7.9	210	16		251		1	68.6
Male	19	174	74	24.4418	4996	8	215	12		236		10	74.3
Female	19	166	51	18.5078	3439	11.4	180	8.9	193		39		65
Male	19	187	78	22.3055	4876	8.3	210	11.2		283		1	65.1
Male	19	170	62.5	21.6263	4684	7.3	215	4.5		204		9	78.6
Female	18	160	48	18.75	2918	9.1	162	17	205		33		79.9
Male	18	170	70	24.2215	4765	7.1	234	13.3		248		3	68.8
Female	18	160	57	22.2656	3297	9.1	170	21.3	227		43		81
Male	18	170	71	24.5675	4869	7.6	195	6.8		219		2	65.7
Male	18	173	64	21.3839	5389	7.4	195	19.4		237		8	75
Female	19	160	44	17.1875	3247	8.8	191	10.8	183		45		83.4
Female	18	162	52	19.8141	3460	9.3	160	29	229		37		83.2
Male	18	172	63	21.2953	4270	7.1	225	9.1		215		2	72.1
Female	19	162	57	21.7193	4176	8.8	177	13	205		30		83.8
Male	19	182	60	18.1138	4500	8.1	187	8.6		261		0	61.4
Female	18	164	46	17.1029	3670	9.5	175	26	228		47		81.8
Female	18	158	47	18.8271	2492	10.6	130	20	189		33		62.8
Male	19	182	59	17.8119	5253	7.2	231	18.1		232		3	72.8
Female	18	155	43	17.898	2474	9.2	155	19	180		37		74.8
Female	18	160	48	18.75	2633	9.8	172	22	187		41		75.9
Male	18	180	73	22.5309	5700	6.8	245	11		193		10	90.8
Male	19	175	74	24.1633	4874	10.5	170	24.8		259		1	47.8
Female	18	155	48	19.9792	2695	8.6	167	12	185		44		77.8
Male	18	170	65	22.4913	3855	7.3	220	14		268		0	67.4
Male	18	168	70	24.8016	4000	8	200	-4.9		262		4	53.9
Male	19	173	72	24.0569	4999	7.5	220	0.7		235		1	65.9
Female	20	155	44	18.3143	2557	10	154	18.3	198		8		65.1
Female	19	161	48	18.5178	2691	8.4	195	20	209		57		86.4
Male	19	183	64	19.1108	5190	6.9	264	6		227		2	78.8
Female	18	165	48	17.6309	3837	9.5	165	23	233		48		82.6
Female	18	161	55	21.2183	3694	9.3	185	21	219		52		85.5
Female	18	162	52	19.8141	3099	9.9	161	21	236		39		76.9
Male	18	166	52	18.8707	3550	7.4	210	6.5		241		2	66.9
Male	18	169	55	19.257	4493	8.2	270	14		216		18	83
Female	18	164	52	19.3337	3411	9	174	19	237		43		82.2
Female	19	164	47	17.4747	3484	8.7	200	3	189		50		78.7
Male	19	170	63	21.7993	4963	7.8	205	8		257		1	68.5
Female	18	162	53	20.1951	3090	10	170	27	234		31		78.2
Male	18	172	65	21.9713	4690	7.4	222	6		242		12	77
Male	19	172	65	21.9713	4056	7.2	228	8		245		8	73.3
Female	19	160	49	19.1406	3913	8.6	157	14	227		32		81
Male	19	175	85	27.7551	5196	7.9	190	8.5		241		1	63.6
Female	18	163	50	18.8189	3714	9.1	160	16	224		44		82.2
Female	18	160	53	20.7031	3370	10	167	15.5	231		45		79
Female	18	166	51	18.5078	3487	9	198	23.5	221		44		86.2
Male	18	174	58	19.1571	3741	7.1	240	10		271		13	75.1
Male	18	183	92	27.4717	4015	8	185	1		298		0	49.1
Male	19	174	53.5	17.6708	4706	7.3	200	4		285		8	64.3
Female	18	168	62	21.9671	3513	8	198	18	180		42		85.8
Female	18	170	56	19.3772	4143	8.6	182	20	213		41		85.6
Male	18	172	76	25.6896	5955	7.8	222	19		242		10	76.4
Male	18	172	65	21.9713	4356	7	225	11		241		5	72.4
Female	19	162	46	17.5278	2793	9.3	165	18	236		42		77.1
Male	18	172	48	16.225	3939	7.2	240	15		271		9	70.6
Male	19	179	60	18.726	3653	7.2	245	-7		241		10	68.2
Female	19	164	51	18.9619	3154	8.7	197	19	222		30		82.3
Male	19	170	62	21.4533	5271	7.1	225	4		234		1	73.6
Male	18	180	60	18.5185	3442	7.2	240	5.2		233		0	68.8
Male	18	168	62	21.9671	5652	7.6	202	13		242		7	71.8
Female	18	168	63	22.3214	3055	9.6	160	26.7	218		32		79.4
Male	19	175	65	21.2245	4595	7	240	16.4		231		3	75.3
Male	19	172	73	24.6755	4239	7.7	205	12.3		267		2	63.1
Female	18	173	53	17.7086	3023	8	160	12.6	225		48		81.2
Male	19	179	65	20.2865	3535	7.6	210	6		262		4	64.7
Male	19	177	77	24.5779	6345	7.4	210	7.2		261		13	74.6
Female	18	169	53	18.5568	3286	8.2	185	15.5	207		56		87.2
Male	18	172	67	22.6474	5337	7	230	4.2		244		5	75
Male	19	182	68	20.5289	3976	7.5	243	12.5		222		19	82.1
Female	18	167	52	18.6453	2749	8.4	175	24	215		48		83.8
Female	19	155	40	16.6493	2653	8.4	180	14	214		45		78.2
Male	18	170	58	20.0692	3960	8	230	17.5		244		5	69.9
Female	18	167	52	18.6453	2798	9.3	175	13	223		29		76.9
Female	19	163	48	18.0662	3091	8.9	170	12	232		47		79
Female	18	161	45	17.3604	2160	7.5	172	13	229		31		80.7
Male	19	179	64	19.9744	4074	7.1	260	11		227		1	73.5
Male	18	170	48	16.609	4301	7.7	225	12		221		8	72.6
Male	18	171	88	30.0947	4806	8.2	190	12		300		0	53.1
Female	18	164	65	24.1672	4343	8.9	175	26.6	221		33		82
Male	19	172	59	19.9432	5130	7.8	215	21.5		232		7	77.8
Male	18	160	61	23.8281	4390	7.1	220	19.5		229		9	78.3
Female	19	163	48	18.0662	3155	8.6	200	17.7	212		40		84.2
Female	18	156	47	19.313	3049	8.9	180	26	214		43		84.2
Male	18	165	44	16.1616	3260	8	230	15.7		249		20	74.5
Female	19	153	48	20.5049	3219	9.3	185	19	233		34		79.8
Male	18	168	60	21.2585	4061	7.5	215	9.2		258		8	71.2
Female	18	160	59	23.0469	4188	8.7	165	24	224		51		86
Male	19	171	62	21.2031	3726	7.5	228	8.5		251		5	68.9
Female	19	164	50	18.5901	2513	9.1	175	24	182		30		69.4
Female	18	163	54	20.3244	4670	8.3	190	20.3	211		56		89.5
Male	18	179	73	22.7833	5518	7.8	215	21		244		3	69.1
Female	18	167	66	23.6652	3112	9.8	168	24.4	192		37		76.9
Male	19	174	74	24.4418	5299	7.7	235	17.1		255		0	70
Male	19	160	46	17.9688	3371	7	237	10		225		11	77.8
Male	18	174	62	20.4783	4842	7.8	220	5.9		294		5	64.7
Male	18	173	68	22.7204	4900	7.1	208	4.3		245		1	66.5
Female	19	162	68	25.9107	4138	9	153	10.2	233		39		76.4
Male	18	183	62	18.5135	5112	7.3	242	10.8		238		3	74.6
Male	19	180	66	20.3704	5129	7.3	250	26.2		222		13	86.8
Male	18	183	58	17.3191	5172	7.2	230	5.7		265		6	70.2
Female	18	162	50	19.052	3631	9.2	165	5.1	237		52		78.6
Female	19	153	42	17.9418	4057	7.8	172	22.5	224		50		87.9
Male	18	174	73	24.1115	4265	7.7	210	12.5		256		0	64.9
Female	18	164	65	24.1672	3176	9.1	190	19.6	209		44		75.8
Female	19	163	64	24.0882	2816	8.6	160	23.4	233		40		76.8
Male	18	177	66	21.0667	4400	7.5	242	11.9		228		1	72
Female	18	160	63	24.6094	2452	10	167	12	213		44		68.2
Female	18	153	42	17.9418	2118	8.6	170	14.2	231		41		76.5
Female	18	147	36	16.6597	2158	8.9	172	25.6	232		43		75.8
Female	19	164	52	19.3337	4073	9	165	24.9	181		36		81.3
Male	19	184	60	17.7221	4884	6.7	258	7.6		243		5	75.4
Male	18	175	60	19.5918	3552	7.2	265	10.5		236		3	71.1
Male	18	168	77	27.2817	3198	8.5	190	20		309		2	52.7
Male	18	180	58	17.9012	4738	7.2	192	8.8		208		1	69
Male	18	183	72	21.4996	5671	8.2	210	7.2		268		1	68
Female	18	161	53	20.4467	3112	7.8	153	16	235		34		79
Male	18	176	120	38.7397	4006	9.2	176	5.8		442		0	36.3
Male	18	178	56	17.6745	4340	7.8	202	-1		239		0	57.8
Male	18	175	75	24.4898	3675	7.3	213	14		245		1	65.4
Female	18	157	48	19.4734	2985	8.8	163	9.6	239		41		76.9
Male	18	176	55	17.7557	4190	7.3	205	14.8		185		2	66.9
Male	18	180	67	20.679	4665	7.1	258	1		244		2	69.3
Male	18	181	69	21.0616	4522	9.4	194	25.3		274		0	58
Female	19	158	55	22.0317	3120	9.1	165	10.3	185		43		76.4
Female	18	166	47	17.0562	3682	8.9	168	20.6	236		52		81.1
Female	18	172	57	19.2672	4932	8.2	175	18	204		55		89.9
Female	19	167	50	17.9282	4160	8.8	177	26.6	227		50		86.5
Female	19	166	52	18.8707	3414	8	230	23	192		61		99
Male	19	175	68	22.2041	4646	7.5	202	16.4		246		0	68.8
Female	19	153	49	20.9321	2935	9.2	140	17.5	191		40		72.3
Female	18	165	70	25.7117	3200	8.4	182	19	234		44		79.4
Male	19	175	75	24.4898	4288	8	212	9.5		258		1	63.5
Female	19	160	47	18.3594	3042	8.9	174	20	232		47		80.4
Female	18	168	60	21.2585	4044	8.8	192	21	203		46		82.6
Male	19	176	54	17.4329	4278	7.6	208	9.7		283		0	61.3
Male	18	177	65.5	20.9071	4279	7.1	232	11		246		3	70.9
Male	18	164	56	20.8209	4340	8.2	202	23		248		4	67.2
Male	18	178	70	22.0932	6081	7.4	210	8.8		261		2	70.6
Male	18	178	55.5	17.5167	4032	6.9	263	24		243		4	73.6
Female	18	165	77	28.2828	4160	9.7	162	18	216		27		67.6
Male	18	167	58	20.7967	4010	7.6	195	1		245		3	56.9
Male	19	178	67.5	21.3041	4242	7.3	230	23.3		241		0	72.4
Female	20	156	49	20.1348	2052	9.1	150	12.5	189		40		71.8
Female	19	165	53	19.4674	2923	11	153	20.3	185		33		59.3
Female	18	153	44	18.7962	2685	9.1	162	21	191		35		75.7
Female	18	165	60	22.0386	4274	9.3	175	17.8	202		48		86.4
Female	19	165	51	18.7328	3009	8.5	175	13.6	237		50		80.5
Female	19	158	43	17.2248	2521	9.1	170	9.9	224		42		77.3
Male	22	173	61	20.3816	5289	7.4	215	13		264		4	71
Female	18	170	62	21.4533	3235	8.5	205	14	239		48		82.9
Male	19	183	70	20.9024	5680	7.1	230	13		256		0	73.4
Male	18	184	72	21.2665	4690	6.3	260	18.5		217		12	87
Male	18	180	60	18.5185	6191	6.6	270	21		184		3	84
Male	18	176	60	19.3698	4565	7.4	250	9		234		5	73.4
Male	19	177	56	17.8748	5490	7.2	255	11		253		4	73.8
Female	18	163	58	21.83	3616	10.3	150	8.2	203		43		73.6
Female	18	157	52	21.0962	2746	9.1	150	14.3	206		60		82.7
Male	18	166	59	21.4109	4662	6.8	250	13		251		8	79.5
Male	18	185	58	16.9467	4116	7	235	17.3		254		0	68.6
Female	18	165	52	19.1001	3267	9.6	140	0	216		0		54
Female	18	161	46	17.7462	2867	8.7	170	19.4	234		26		78
Male	18	174	48	15.8541	4473	6.7	255	15.5		247		15	81.6
Male	18	171	58	19.8352	4935	6.5	265	17.3		217		23	96
Male	18	168	67	23.7387	4432	6.7	245	3.5		294		3	67.8
Male	18	174	50	16.5147	4318	7	245	6.3		243		1	69
Female	17	162	54.4	20.7285	2680	8.2	160	19.5	235		51		79.7
Female	18	173	53	17.7086	3297	8.3	180	25.3	217		28		84.3
Female	18	167	58	20.7967	4568	8.3	190	15	201		52		83.5
Male	18	180	81	25	5503	6.8	235	14.4		229		3	75.8
Female	18	163	47	17.6898	2521	8	185	15	215		45		82.5
Male	18	178	56	17.6745	3316	8	215	7.8		279		0	57.9
Female	18	153	46	19.6506	2589	8.5	175	19.5	225		32		78.9
Male	18	180	66	20.3704	5646	7.1	245	23.8		242		5	77.1
Male	19	157	50	20.2848	3635	6.7	265	8.5		248		14	82
Male	18	180	75	23.1481	5468	8	200	16		268		1	67.6
Female	18	161	49	18.9036	2715	8.7	165	7	233		50		77.8
Female	18	160	44	17.1875	3180	8.6	190	20	188		54		83
Female	18	170	56	19.3772	3785	8.3	190	25	222		51		88.5
Male	17	172	70	23.6614	4997	7.4	230	11		272		4	70.5
Male	19	167	57	20.4382	3829	7.6	210	8		232		7	71.4
Male	18	175	62	20.2449	4813	6.7	240	11		228		7	81.3
Male	18	166	60	21.7738	4347	7	260	17		239		16	83.2
Female	18	150	45	20	2771	8	180	18	201		43		85.3
Male	19	172	70	23.6614	4578	7.6	205	10		234		2	69.1
Female	18	172	48	16.225	3289	8.6	180	23	223		55		82.3
Female	19	167	56	20.0796	3761	8.8	170	27	192		33		82.2
Female	18	162	52	19.8141	2943	9.2	150	19	184		37		76.7
Female	19	161	70	27.0051	3741	8.8	150	19	180		51		77.7
Female	18	161	48	18.5178	3164	8.6	195	19	231		40		82.5
Male	18	180	76	23.4568	6048	7.1	230	27		238		17	86.4
Male	18	183	68	20.3052	5920	7.4	250	18		235		18	85.5
Male	18	172	80	27.0416	5127	7.4	235	20		268		5	70.9
Female	18	168	54	19.1327	3666	8.4	165	20	184		50		84.9
Male	19	172	75	25.3515	4180	7.3	200	12		247		1	64.3
Male	19	170	55	19.0311	5018	7.4	225	19		249		9	77.8
Male	18	178	55	17.3589	3693	7.4	210	7		234		1	64.6
Male	17	172	52	17.5771	3454	7.1	240	13		224		2	68
Male	19	178	66	20.8307	4858	6.9	260	15		242		4	77
Female	19	160	48	18.75	5963	8.7	180	14	237		50		83.5
Female	18	156	50.5	20.7512	2815	9.7	165	23	204		24		73.2
Male	18	180	75	23.1481	5179	8.3	215	19		264		0	70.2
Male	19	166	52.5	19.0521	3065	6.9	205	18		236		1	68.3
Female	19	155	45	18.7305	2697	10.8	150	17	215		29		60.6
Female	19	157	50	20.2848	2600	8.4	180	17	224		48		80.8
Male	18	178	56	17.6745	4437	7.6	240	25		236		2	71.2
Female	18	162	45	17.1468	3451	7.8	200	21	208		45		87.3
Female	18	161	48	18.5178	2999	9	170	31	231		24		78.5
Female	18	162	45	17.1468	2700	8.7	170	15	207		40		72.5
Male	18	175	80	26.1224	4221	7.3	220	7		248		0	65.9
Male	18	173	82	27.3982	5665	6.9	260	13.5		226		1	76.5
Male	18	186	79	22.835	5139	6.9	230	27.5		237		2	79.8
Female	18	161	48	18.5178	3406	8	205	13	228		37		86.1
Male	18	172	61	20.6193	4482	8	230	15.5		242		2	68.4
Male	19	164	73	27.1416	4249	6.7	260	16		294		14	75.4
Male	18	180	67	20.679	3900	7.3	250	22		241		0	72
Female	19	159	48	18.9866	2893	8.9	150	11	204		32		72.2
Female	19	171	64	21.8871	4143	9.3	190	33	239		30		83.7
Male	20	162	62	23.6244	4222	7.3	200	9.5		265		9	70.5
Female	18	163	54	20.3244	3100	7.8	210	20	183		50		88.5
Female	19	153	35	14.9515	2624	9.2	170	6.5	238		31		71.2
Male	18	178	55	17.3589	4700	7	200	20		221		7	73.3
Male	17	174	54	17.8359	4800	6.9	255	12		182		3	77.5
Female	19	163	51	19.1953	3001	8.3	200	13	228		41		82
Male	18	173	69	23.0546	4312	6.8	220	2		205		10	80.6
Female	19	159	50	19.7777	3440	9.6	160	20.5	189		36		78.8
Male	18	171	65	22.2291	4600	6.7	225	12		246		3	75.5
Male	18	168	52	18.424	3130	7.4	255	23		237		8	75
Male	19	168	65	23.03	4313	6.9	240	14.5		185		2	75.2
Male	18	173	70	23.3887	4450	7.5	200	7.5		274		1	62.6
Male	18	183	85	25.3815	6800	8.1	225	7		237		0	69
Male	20	179	63	19.6623	5000	7.3	205	24		228		5	75.5
Female	18	168	45	15.9439	3506	7.7	200	17	222		33		84.2
Female	18	165	51	18.7328	3126	8.7	170	19	192		56		81
Female	19	163	50	18.8189	3233	8.9	175	22	234		50		82.3
Male	19	182	54	16.3024	3620	7.3	265	14		231		6	71.4
Female	18	172	73	24.6755	3705	9.2	155	10	228		49		77.9
Female	19	160	52	20.3125	2781	8.9	180	25	185		55		82.9
Female	19	156	46	18.902	2174	8.7	185	11	229		44		77.5
Female	19	154	40	16.8663	2811	9.2	155	-1	238		60		70.4
Female	19	162	64	24.3865	3401	9.9	155	16	227		49		77.5
Female	18	156	52	21.3675	3337	8.4	180	6	183		44		83.7
Male	19	177	61	19.4708	3762	6.9	255	4		241		6	73.1
Female	18	169	55	19.257	3188	9.2	170	17	192		40		77.5
Male	19	178	56	17.6745	3498	7.1	260	7.5		241		2	67.2
Female	19	153	47	20.0777	2077	8.7	185	18.5	183		42		77
Male	18	178	62	19.5682	4441	7.7	205	6.5		253		5	67.4
Male	19	171	61	20.8611	4586	7.2	240	13		237		5	74
Female	20	157	44	17.8506	3418	7.8	215	21	188		48		95.5
Female	18	165	48	17.6309	1757	8.4	205	28	237		48		72.9
Male	19	181	57	17.3987	5026	7.7	245	24		246		8	76.3
Male	18	170	51	17.6471	4720	7.2	240	6.5		239		10	74.8
Male	18	183	63	18.8121	4952	7.3	255	11		232		9	80
Male	19	175	59	19.2653	3915	7.6	230	11		183		15	79.6
Female	18	162	56	21.3382	2868	9.2	165	20	222		44		79
Male	19	176	78	25.1808	5285	7.9	220	1.5		242		1	63.8
Male	17	176	64	20.6612	5093	7.9	215	10		225		0	73
Male	17	183	104	31.055	5811	9.2	150	-3		298		0	42
Female	18	157	73	29.6158	4733	8.4	160	16.5	189		32		74.4
Female	18	163	53	19.9481	1583	10.1	170	22.5	198		31		63.2
Male	19	179	72	22.4712	5451	6.7	275	16		185		14	90.4
Male	18	182	56	16.9062	5084	7.3	245	8		234		2	71.8
Male	18	177	98	31.2809	6581	8.5	215	16		284		2	61
Male	19	175	63	20.5714	4456	7.5	240	15		285		1	67.4
Female	18	157	41	16.6335	2850	10.7	145	18.5	188		28		63.4
Male	18	167	65	23.3067	5840	7.3	210	16.5		285		2	69.4
Male	18	174	105	34.6809	5177	8.5	200	17		302		1	55
Male	19	176	69	22.2753	5671	7.7	230	13.5		268		1	71.2
Female	18	160	57	22.2656	3980	9	195	23	237		51		85.7
Female	18	173	82	27.3982	3984	10.3	150	15.5	223		17		62.4
Male	18	182	52	15.6986	3816	8.5	215	5		223		2	63.5
Male	19	174	47	15.5238	4013	7.7	245	6.5		254		1	65.3
Female	18	166	55	19.9594	3761	9.3	175	9	185		40		80.6
Male	18	170	62	21.4533	3719	7.6	210	19		248		1	67.9
Male	18	175	65	21.2245	3812	7.4	230	22.5		244		1	66.7
Male	18	162	49	18.6709	3100	7.9	230	19		273		2	63.4
Female	18	159	61	24.1288	4259	8.8	155	12.5	225		44		78.4
Male	19	172	62	20.9573	5186	7.3	215	4.5		223		3	73.4
Male	19	170	68	23.5294	4082	7.6	235	16.5		268		4	68.2
Female	19	164	55	20.4491	3421	9.5	150	16	216		47		81
Female	18	157	45	18.2563	3250	8.1	190	28.5	228		54		87.3
Male	18	181	61	18.6197	5482	7.4	255	5.5		208		4	76.4
Female	18	160	59	23.0469	3029	8.7	190	21	214		53		85.2
Female	18	152	40	17.313	2479	9.2	175	20	211		45		74.6
Female	21	162	42	16.0037	2948	9.3	165	16.5	198		31		71.7
Female	18	164	46	17.1029	3348	9.6	150	22.5	231		41		75.3
Female	18	168	53	18.7783	3812	9.3	190	13	226		48		83.1
Male	19	179	60	18.726	5100	7.6	215	7.5		243		3	69.4
Male	19	182	80	24.1517	5159	7.4	230	19		267		1	69.6
Female	18	159	54	21.3599	3450	9.5	150	14	182		48		78.2
Male	18	174	70	23.1206	4992	7.4	230	9		217		2	74.1
Female	18	161	46	17.7462	3957	8.5	190	7.5	233		41		82.9
Male	18	180	69	21.2963	4888	7.4	220	17		254		2	71.3
Female	18	175	86	28.0816	4873	10	160	23	222		37		69
Female	18	162	51	19.433	3180	8.4	195	10	223		50		83.5
Female	18	157	52	21.0962	3288	9.3	170	22	227		36		80
Female	18	162	47	17.9089	3050	9.9	170	15.5	224		49		78.9
Female	18	155	53	22.0604	2624	9.3	180	9	236		40		76.2
Male	18	176	75	24.2123	5100	7.1	230	15		240		6	74
Female	18	160	49.5	19.3359	2921	9.7	165	19	188		38		75.9
Female	18	163	52	19.5717	3276	11.1	150	18	197		0		57.8
Male	18	177	63	20.1092	5664	6.6	245	19		248		1	79.4
Female	18	164	45	16.7311	2876	9.1	155	8	217		56		77.2
Female	19	165	58	21.3039	3234	9	175	20	234		38		80.2
Male	18	175	64	20.898	5105	7.9	240	11		249		2	72.6
Male	18	172	67	22.6474	4342	7	250	7		252		10	78
Male	17	173	73	24.3911	4528	8.1	175	5.5		301		0	52.2
Male	18	174	48	15.8541	4756	7.8	250	7		229		4	68.8
Female	19	155	47	19.563	3292	8	210	15	214		54		88.5
Male	18	182	62	18.7175	4851	7	250	4		241		10	79.9
Female	18	159	48.5	19.1844	3341	8.7	160	24	215		39		84
Male	18	176	48	15.4959	3949	6.9	230	19		256		1	69.3
Male	19	171	57	19.4932	4888	7.3	215	12.5		238		1	71.9
Female	18	154	45	18.9745	3748	9.2	170	23	181		44		81.6
Male	18	171	54	18.4672	4936	7.2	265	21		239		11	83.2
Male	18	176	65	20.984	4713	7.3	240	11		207		10	82
Female	18	156	55	22.6003	3461	9.3	190	29	229		41		85.5
Female	19	160	70	27.3438	3404	8.1	190	8	217		38		81.9
Male	18	178	70	22.0932	5445	7.2	240	15.5		235		2	75.6
Male	18	170	58	20.0692	4020	7.6	240	13		235		10	76.5
Female	18	168	58	20.5499	3240	9.9	150	26	203		40		75.8
Male	19	180	74	22.8395	5058	7.9	235	16		253		2	72.4
Female	18	154	50	21.0828	3201	8.6	175	15.5	233		39		80.4
Male	18	185	86	25.1278	6210	7.6	240	7		264		1	68.2
Male	19	166	79	28.6689	5300	7.8	195	10.5		242		1	61
Male	18	173	101	33.7465	5381	8.5	180	13.7		336		0	48.6
Male	19	168	84.3	29.8682	4939	7.2	220	7		262		1	64.7
Male	18	174	56.3	18.5956	4638	7.4	252	4		276		17	76
Female	18	166	60.9	22.1004	3307	10.4	172	4.8	233		44		72.9
Female	18	165	48.1	17.6676	2682	9.4	158	21.8	228		44		77.7
Male	19	172	70	23.6614	4790	7.2	220	6		218		5	73.2
Female	18	167	56.7	20.3306	3967	8.9	173	23	233		51		84.9
Male	18	168	61.8	21.8963	5253	7.4	255	19.7		241		1	76.1
Male	20	170	55.2	19.1003	4186	7	257	17.8		245		0	74.2
Female	19	163	46.9	17.6522	3539	9.9	180	14.6	236		41		80
Male	18	175	53.2	17.3714	4274	7.2	237	1.7		185		3	65.9
Female	18	160	55.2	21.5625	3021	8.8	157	6.9	237		33		75.6
Male	18	170	52.1	18.0277	4227	7.3	237	22		267		3	71.1
Male	19	180	57.4	17.716	4712	7.8	205	7		272		1	62.5
Female	18	167	60	21.5139	3533	8.8	192	22.7	234		40		84.9
Female	18	179	65.4	20.4113	4132	8.8	185	14.7	228		24		80.6
Male	18	170	69.2	23.9446	4287	7.5	225	8.7		265		3	67.7
Female	19	160	47.4	18.5156	3172	8.2	192	15.4	234		50		83.4
Male	19	181	58.4	17.8261	4590	7.6	240	2.5		236		0	66
Female	19	160	64.3	25.1172	3607	9.4	170	15.7	227		37		77.8
Male	19	188	100	28.2933	6217	7.7	240	11.7		271		0	65.4
Female	18	163	53.4	20.0986	2712	8.8	178	8.6	185		40		77.7
Female	18	163	59	22.2063	2928	9.4	145	17.9	217		31		68.5
Female	20	165	59	21.6713	3844	8.8	185	26.2	192		54		93.3
Male	18	172	57.9	19.5714	4487	7.8	240	5.4		251		0	68.8
Female	19	165	75.2	27.6217	3607	9.1	157	11.1	218		45		72.2
Female	17	164	49.6	18.4414	2929	8.1	163	17.4	184		37		80.1
Male	18	173	81.1	27.0975	5144	8	200	17.2		284		2	62.8
Male	18	187	53.8	15.3851	4150	7.8	225	3.4		257		9	67.8
Female	19	172	95	32.112	4589	10.1	140	15	201		20		62.4
Male	18	185	75	21.9138	6150	7.8	235	10		249		0	72
Female	18	163	49	18.4425	2456	8.6	185	14	184		41		79
Male	18	175	80	26.1224	4825	7.6	200	8		265		0	63.3
Female	18	169	53	18.5568	2759	8.5	185	0	181		0		70.7
Female	18	165	53	19.4674	3224	9.9	145	10	184		50		74
Male	19	174	59	19.4874	5612	6.7	250	5		208		15	89
Female	18	161	50	19.2894	2237	9.3	150	12	235		29		71.4
Male	18	174	69	22.7903	4113	7.8	170	-7		254		0	54
Male	18	173	53	17.7086	4490	7	255	24		268		9	75.5
Male	18	181	65	19.8407	5254	7.2	230	15		238		5	75.6
Female	18	160	51	19.9219	3068	8.8	175	12	229		34		78.6
Male	18	178	70	22.0932	5594	7.4	230	16		245		2	73.8
Male	18	182	67	20.227	5565	7.2	215	1		239		8	73.2
Female	18	163	49	18.4425	3555	8.9	190	22	185		66		94
Female	18	160	45	17.5781	2592	8.4	153	18	213		38		79.1
Male	19	174	61	20.148	4253	6.9	220	-3		234		0	66.1
Female	18	160	48	18.75	3984	9.4	150	27	233		28		80
Female	18	166	51	18.5078	3112	9	145	18	225		34		75.6
Female	19	160	57	22.2656	3706	8.8	175	14	226		46		83.2
Female	18	167	55	19.721	4654	8.9	160	18	218		43		82.8
Male	19	175	71	23.1837	3777	7.8	195	-8		249		0	56.5
Male	19	175	60	19.5918	4699	6.6	258	12		242		7	80.7
Male	18	176	59	19.047	4010	7.4	170	-4		248		0	54.9
Female	18	163	48	18.0662	1426	9.8	168	18	196		21		58.8
Female	20	165	52	19.1001	2656	9	175	13	236		28		75.8
Male	18	170	52	17.9931	4264	7.4	215	8		240		0	69.1
Male	18	175	70	22.8571	4417	6.6	220	16		240		4	75.6
Female	18	164	50	18.5901	3026	9.3	130	28	229		26		73.6
Male	19	169	52	18.2066	4414	6.6	220	13		237		9	80.6
Female	18	168	67	23.7387	4145	8.1	170	9.5	208		46		80
Female	18	170	56	19.3772	3206	9	165	9	181		44		77.5
Male	18	174	88	29.0659	4148	9	160	10		309		0	47.2
Female	18	161	46	17.7462	2586	8.5	181	15	193		37		76.9
Male	19	180	79	24.3827	5338	7.9	220	5.2		267		1	66.6
Male	18	178	68	21.4619	5415	8.2	240	7.3		249		2	71.2
Female	18	165	59	21.6713	4096	8.9	130	2	188		26		66.8
Female	18	164	46	17.1029	2989	8.8	160	20	197		60		85.1
Male	18	172	74	25.0135	4363	7.4	240	24		293		1	64.3
Male	18	177	74	23.6203	4957	7.3	234	17		259		5	73.7
Female	18	160	42	16.4062	3159	9	165	19	239		56		78.8
Female	18	172	56	18.9292	3591	8.8	180	14.5	185		32		81.6
Female	18	168	65	23.03	3757	9.7	153	11	182		49		77.1
Male	18	171	61	20.8611	4386	7.3	235	15		278		18	76.9
Male	19	181	63	19.2302	4372	7.2	210	21		223		3	72.7
Female	19	155	45	18.7305	2209	10.2	110	24	237		46		68.9
Male	19	171	62	21.2031	4146	7.3	210	17.5		248		3	69.4
Female	18	168	45	15.9439	3748	9.1	200	11.7	180		49		80.1
Female	18	166	57	20.6852	2874	9	140	19	229		49		75.9
Male	18	172	74	25.0135	4716	8.1	195	16.5		266		0	61.9
Male	18	184	75	22.1526	4205	7.5	210	5.3		289		4	64.1
Male	18	167	55	19.721	4400	7.4	240	0		266		12	71
Male	18	158	41	16.4237	3624	8	175	16		285		1	53.8
Female	19	155	45	18.7305	2781	8.5	172	4.2	231		42		74.9
Female	18	169	52	18.2066	3864	9.2	155	2.6	228		39		74
Male	19	176	108	34.8657	4491	8.1	185	8		309		0	50.6
Female	18	158	56	22.4323	3923	9.2	162	19	189		38		79.8
Male	18	174	53	17.5056	4016	7.4	200	11.2		242		7	65.1
Female	19	162	49	18.6709	3317	9.2	180	18	225		48		81.7
Female	18	162	43	16.3847	2293	8.9	185	13	227		53		76
Female	18	165	63	23.1405	3023	8.8	170	18	196		36		77
Male	19	175	56	18.2857	4362	6.8	250	18.5		223		11	84
Male	18	168	61	21.6128	3741	8	200	10		242		5	64.1
Female	19	162	55	20.9572	3352	9.7	150	15	193		35		75
Male	18	176	52	16.7872	3990	7.2	245	5		229		8	71.7
Male	18	172	65	21.9713	4883	7.3	265	21		224		26	94.2
Female	18	157	42	17.0392	2275	9.3	145	12	185		40		69
Female	18	161	44	16.9747	3060	8.8	185	18	229		32		76.8
Female	18	159	45	17.7999	2917	9.9	180	13.5	199		38		74.7
Female	18	159	51	20.1733	3657	9.9	180	21	215		38		76.3
Female	18	160	44	17.1875	2851	9.5	155	18	183		46		74
Female	18	162	45	17.1468	2860	9.5	160	11	181		43		71.4
Male	18	180	70	21.6049	5231	8	220	21.5		257		2	72.8
Female	18	167	62	22.231	3847	9.5	150	15.5	183		36		75
Female	18	163	45	16.937	3024	9.4	195	22	202		30		74.3
Male	18	174	67	22.1297	4227	7.5	225	8		278		2	65.3
Male	18	172	64	21.6333	3520	8.2	220	7		261		10	70.3
Male	19	181	73	22.2826	5391	8.7	205	12		265		2	67.2
Female	18	163	50	18.8189	3519	9.7	155	16.5	204		37		76.8
Female	18	160	48	18.75	2613	8.9	165	7.5	188		44		75.4
Female	19	166	56.5	20.5037	3107	9.6	145	15	223		46		75.4
Male	19	176	71	22.921	4194	7.3	240	12		264		3	69.3
Female	18	164	42	15.6157	3089	9.8	195	14	203		35		78.8
Female	19	150	45	20	2805	9.8	155	24	193		37		75.5
Female	18	164	61	22.68	3337	9.4	160	19.5	232		38		79.1
Female	17	158	44	17.6254	3001	9.4	200	17	191		29		77
Male	18	172	60	20.2812	4201	8.2	210	14		258		2	66.5
Female	19	157	58	23.5304	3104	10.2	150	22	231		30		74.1
Female	18	158	56	22.4323	2677	10	155	7	202		47		71.2
Male	19	180	88	27.1605	6293	8.4	200	1.5		300		0	55.2
Female	19	164	55	20.4491	3744	9.6	170	15.5	209		46		83.8
Female	19	164	47	17.4747	2359	9.2	170	23	189		40		76.5
Male	18	178	50	15.7808	3840	7.4	225	6		244		14	72.6
Female	19	161	49	18.9036	3032	9.5	160	20	239		52		79
Female	19	163	55	20.7008	4392	10	165	17.5	182		49		78.1
Female	18	161	46	17.7462	2823	9.5	160	0	204		42		67
Male	19	171	58	19.8352	4607	8.6	170	2		185		2	59.8
Female	19	165	53	19.4674	2447	9.3	170	-3	188		35		67.2
Male	18	162	56	21.3382	3878	7.5	210	12		215		4	70
Male	19	181	79	24.114	4933	8.3	190	5.5		285		1	58.1
Female	18	160	53	20.7031	3598	9.3	155	20.5	232		48		81.4
Male	18	174	57	18.8268	3156	7.3	220	0		255		19	71.4
Female	18	165	50	18.3655	3448	8.7	170	16	182		50		81.1
Female	18	156	56	23.0112	3269	8.7	155	22	218		38		80.9
Male	19	176	65	20.984	5333	7	250	18.5		235		7	80.8
Female	18	162	61	23.2434	1569	10	155	14	199		41		61.4
Female	18	161	46	17.7462	3473	8.5	180	16.5	203		47		88
Female	18	161	46	17.7462	2937	9.6	180	-2	228		32		69.9
Male	19	180	50	15.4321	3979	7.6	255	-11		241		4	60.3
Male	18	166	57	20.6852	5225	8.1	230	9		263		10	76
Female	19	156	49	20.1348	2141	9	150	3.5	228		40		61.1
Male	20	172	62	20.9573	4573	7.1	250	19		205		10	83.8
Female	19	161	62	23.9188	3686	9.6	165	21.5	189		40		79.9
Female	18	165	54	19.8347	3560	9.2	185	22.5	186		49		83.5
Female	19	147	43	19.8991	2417	8.6	170	3.5	197		38		70
Female	18	157	45	18.2563	2429	9.9	150	18.5	228		44		66.6
Female	20	152	41	17.7458	2500	8.9	170	15.5	184		47		77.3
Male	17	172	68	22.9854	4954	8.1	225	13.5		297		1	65.4
Female	18	155	47	19.563	2942	8.7	175	16.5	206		55		84.6
Female	18	161	54	20.8325	2549	8.8	190	9	207		43		75.2
Male	18	176	74	23.8895	4716	7.8	192	9		248		0	64.3
Male	19	175	58	18.9388	3800	7.3	222	8		243		10	74.3
Male	19	165	57	20.9366	4673	7.2	240	7.8		247		10	77.3
Male	18	172	66	22.3094	4302	7.4	231	14.5		248		1	70.2
Female	18	162	46	17.5278	3910	8.7	168	9.5	213		47		83.6
Female	18	160	66	25.7812	3457	9	152	14.5	186		30		75
Female	19	165	46	16.8962	2932	8.4	180	10	197		41		74.3
Male	18	175	56	18.2857	4770	7	233	10		185		15	82
Female	18	162	44	16.7657	3431	7.9	193	12	197		35		79.3
Male	19	167	57	20.4382	4283	7	255	16		244		10	79.3
Male	18	175	63	20.5714	4132	7.6	210	11.5		227		4	69.8
Female	19	162	55	20.9572	3572	9.5	182	17	188		46		71.2
Female	19	175	58	18.9388	4319	8.7	185	13	235		44		82.8
Male	19	172	70	23.6614	4019	7.3	238	11.7		243		10	76.1
Female	19	165	52	19.1001	2938	9	177	13.5	226		42		78.9
Male	19	173	60	20.0474	3792	7.7	219	15		245		1	68.3
Female	18	160	53	20.7031	2099	10.1	152	11	180		43		71
Female	19	165	54	19.8347	3854	9.6	170	25	182		49		82.8
Male	18	172	50	16.901	3795	7	230	21.5		227		5	72.1
Female	18	167	44	15.7768	2747	9.6	162	20.5	234		47		74.1
Female	17	170	60	20.7612	3451	9.5	158	12.5	203		21		72.8
Female	17	167	56	20.0796	2049	9.2	173	6.5	196		24		69.6
Female	17	161	44	16.9747	1995	9	170	4.5	184		41		62.5
Female	19	165	54	19.8347	3103	9.1	168	21	189		28		77.1
Male	18	176	58	18.7242	4588	7.2	263	23.3		232		6	79
Male	18	180	84	25.9259	5530	7.8	207	0		282		0	58.4
Male	19	166	57	20.6852	3784	7.5	232	24.3		275		7	70.4
Female	18	152	44	19.0443	2641	8.9	184	26	222		41		82
Male	20	180	68	20.9877	6257	6.8	250	17		222		10	86.8
Female	19	160	48	18.75	3190	9.1	182	13	225		48		80.8
Male	18	182	72	21.7365	4207	8.2	213	14		266		2	66.3
Female	19	164	56	20.8209	2863	10	155	16	215		34		69.2
Female	19	167	57	20.4382	2438	10.8	140	16	184		32		58.2
Female	18	167	64	22.9481	3426	9.4	165	26	194		37		81
Female	20	160	52	20.3125	3898	9.7	190	22	238		59		86
Male	18	172	57	19.2672	3672	7.4	215	3		218		4	67.6
Female	18	160	63	24.6094	2943	9	160	12	183		32		72.5
Male	19	162	50	19.052	3576	8.5	225	7		243		16	71.8
[truncated: 9,308 more rows]

## Sheet: Y2020
Gender	Age	Height (cm)	Weight (kg)	BMI (kg/m2)	Vital capacity (ml)	50-m dash (s)	Standing long jump (cm)	Sit-and-reach (cm)	800 m (s)	1000 m(s)	Sit-ups (count)	Pull-ups (count)	Total score
Female	19	167	72	25.8166	3790	10.3	155	10	264		38		71.8
Female	19	157	46	18.662	3205	9.2	173	25	227		51		82.8
Female	18	168	75	26.5731	4252	8.7	190	10.3	232		37		79.5
Female	19	160	52	20.3125	3433	8.3	180	23.5	204		45		89.6
Female	18	165	55	20.202	3577	9.4	175	13	183		27		82.2
Female	18	161	75	28.9341	3885	9.3	150	15	265		38		69.8
Male	19	174	63	20.8086	4938	6.9	255	25		205		8	87.3
Male	18	167	49	17.5697	4404	7.9	195	0		239		9	62.8
Male	19	177	85	27.1314	6350	8.3	215	22.3		255		0	69
Male	20	170	66	22.8374	3728	7.6	220	17		238		0	69.1
Male	18	181	71	21.6721	5958	6.6	290	17		208		26	101.8
Female	18	157	45	18.2563	3486	10	152	7.5	262		43		75
Female	19	160	55	21.4844	3613	9.1	175	18.7	214		50		85.3
Female	18	168	57	20.1956	3439	8.6	190	21	197		57		92.2
Female	18	163	53	19.9481	4092	9.7	153	24	289		18		68.7
Female	18	163	55	20.7008	4018	8.2	215	26	227		58		92.6
Female	18	161	46	17.7462	3358	9	170	25.7	215		48		85.3
Female	19	166	47	17.0562	1899	9.7	155	13	236		46		65.7
Female	18	159	48	18.9866	3577	8.5	166	19.5	201		47		87.6
Male	19	163	59	22.2063	5004	6.9	200	3.3		184		14	79.8
Female	20	168	61	21.6128	4068	7.8	180	21.5	204		41		89.7
Male	19	180	64	19.7531	5301	7.4	260	15		235		7	79.1
Male	19	180	75	23.1481	5397	7.8	185	15		259		6	67.8
Female	18	160	52	20.3125	3334	9.5	155	1.3	286		32		62.9
Female	17	165	73	26.8136	3473	9.1	175	16	185		32		78.2
Female	18	159	58	22.9421	3247	8.8	187	30	208		41		85.9
Male	17	181	71	21.6721	4096	7.2	247	22		217		1	74.8
Female	20	162	50	19.052	2772	9.1	180	8	219		45		78.3
Female	19	164	58	21.5645	3043	9.1	180	19	267		42		77.2
Male	20	166	81	29.3947	5015	7.4	232	17		248		10	73
Male	18	169	64	22.4082	4791	8.5	200	9.5		273		0	61.8
Male	18	177	98	31.2809	5827	9.1	185	12.5		343		0	48.2
Female	20	167	53	19.0039	3989	8.8	205	6	202		37		86.3
Female	19	168	50	17.7154	3949	7.9	172	26.5	225		50		88.5
Female	18	163	49.5	18.6307	3655	9.1	152	15.7	208		47		83.8
Male	19	171	54	18.4672	3947	7.1	245	19		246		12	78.7
Female	18	164	53	19.7055	3389	9.3	190	25	183		37		86.3
Male	18	166	64	23.2254	4664	7.1	235	7		237		8	76.2
Male	18	166	61	22.1367	3045	7.2	213	27		262		0	67.1
Female	18	165	62	22.7732	3475	8.6	180	8.5	213		41		83.6
Male	19	171	55	18.8092	3841	7.3	248	15.7		267		8	73.4
Male	19	172	65	21.9713	3732	7.9	203	21.5		262		5	67.7
Female	18	166	55	19.9594	2896	8.1	178	12	211		45		81.8
Male	18	170	73	25.2595	5067	7.9	193	7		256		0	64
Male	19	175	59	19.2653	4128	7.1	247	25.5		214		16	85.7
Female	18	161	71	27.3909	4376	9.2	167	14.5	243		35		76.4
Male	19	175	71	23.1837	5032	7	242	23		229		23	92
Male	19	161	50	19.2894	4949	7.1	248	15		227		2	76.5
Male	19	174	67	22.1297	4750	7.7	230	6.5		247		10	75.9
Female	19	161	50	19.2894	3567	8.6	173	20.5	225		45		84
Male	19	180	72	22.2222	5840	7.4	255	23.5		235		2	77.5
Male	18	176	82	26.4721	5855	8.2	230	10		249		1	68
Female	18	162	62	23.6244	3812	8.8	200	10	235		26		81.2
Female	18	167	57	20.4382	3764	8.7	173	23.4	229		35		84
Male	19	170	56	19.3772	4273	7.2	245	15.5		184		10	79.7
Male	19	178	55	17.3589	4497	7.2	230	14		209		11	77.4
Male	19	171	56	19.1512	4011	7.2	248	18		234		6	74.5
Male	18	171	56	19.1512	4735	7.1	233	18.4		213		3	76
Female	20	158	58	23.2335	2674	9.1	151	20	215		38		78.4
Male	19	171	65	22.2291	5115	7	233	18		201		12	88
Female	18	147	40	18.5108	2510	9.1	165	18.7	239		45		77.1
Female	19	158	50	20.0288	2943	9.5	165	20.7	227		20		74.2
Female	19	170	80	27.6817	4532	9.2	173	24.6	236		35		79.5
Male	18	172	52	17.5771	4165	6.9	252	16.5		231		10	78.4
Female	19	158	45	18.026	2793	8.6	215	27	209		31		85.7
Female	18	165	60	22.0386	3726	9.5	150	25	252		52		80.7
Female	18	167	75	26.8923	4368	9.2	180	14	239		36		77.8
Male	18	180	112	34.5679	4983	7.8	210	11		308		0	58.6
Female	18	159	49	19.3821	3628	9.2	188	19	231		55		85.2
Male	18	176	65	20.984	5213	7.6	200	6		214		22	85
Female	18	167	60	21.5139	3182	9.2	165	11	234		41		77.8
Female	18	160	55	21.4844	3013	8.6	160	23	198		30		84.2
Female	18	166	53	19.2336	3429	8.8	165	23	209		47		86.6
Male	19	187	69	19.7318	4565	7.5	210	24		214		1	75.5
Male	18	179	53	16.5413	4368	7.7	220	5		232		2	66.6
Male	18	185	75	21.9138	5196	7.8	205	0		274		0	61.4
Male	19	172	60	20.2812	4868	7.9	185	7		261		1	63.1
Female	18	160	45	17.5781	3264	8.8	182	21	207		48		85
Female	19	161	61	23.533	3428	9	175	27	237		42		84.4
Male	18	179	88	27.4648	5070	7.9	225	10		241		0	68.6
Female	18	164	52	19.3337	3200	9.5	168	13	239		29		76.4
Female	20	164	62	23.0518	3360	9.3	169	26	228		40		83.4
Female	18	166	55	19.9594	3504	8.9	180	26	217		48		87.6
Female	19	166	44	15.9675	3304	9.4	150	3	236		59		71.9
Female	18	161	51	19.6752	2691	8.1	175	9	232		40		78.4
Male	20	180	75	23.1481	5004	8	222	15		243		0	71.5
Female	19	166	78	28.306	4036	9.9	165	17	259		27		70.4
Female	18	163	57	21.4536	3375	8.8	170	16	203		42		85.3
Male	19	175	89	29.0612	5011	7.8	250	10		266		4	64.8
Female	20	174	58	19.1571	2941	8.4	200	14	204		36		84.5
Female	18	166	50	18.1449	3366	9	185	19	228		46		83.3
Female	18	160	50	19.5312	3666	7.8	200	26	182		55		94.5
Male	18	180	61	18.8272	4017	7.5	240	18		185		1	72.1
Female	19	169	55	19.257	3061	8.7	185	18	212		37		82
Male	19	162	53	20.1951	5206	7.3	205	17		206		11	82.8
Male	19	173	66	22.0522	5511	6.9	235	19		224		8	82.8
Male	18	175	55	17.9592	5572	7.5	200	16		222		14	80.4
Female	18	160	50	19.5312	2520	8.7	150	16	206		38		78.3
Male	18	176	61	19.6927	5172	7	280	19		182		21	96
Male	18	170	72	24.9135	4263	7.3	245	19		225		23	84.7
Female	18	170	56	19.3772	3088	9.5	165	13	221		49		78.9
Male	19	170	64	22.1453	4294	7.5	210	13		225		3	70.7
Female	18	163	46	17.3134	3624	8.5	180	13	199		48		87.4
Female	19	159	48	18.9866	3400	9.7	165	22	211		55		85
Male	18	170	60	20.7612	5019	7.2	240	23.5		215		13	85.2
Male	19	180	70	21.6049	5470	7.8	205	0		249		2	65
Male	18	171	74.5	25.4779	5072	7.3	235	14		218		10	79.2
Female	18	170	56	19.3772	3309	9.2	168	15	225		43		79.9
Female	19	162	53	20.1951	3800	7.6	220	25	186		58		101.5
Female	19	169	55	19.257	3573	9.6	180	25.2	240		45		82.7
Male	18	180	88	27.1605	5700	7.8	218	18.5		241		4	69.4
Male	18	168	62	21.9671	5375	8	200	6		242		3	67
Female	18	170	60	20.7612	3400	8	207	28	182		58		97
Male	19	173	60	20.0474	4400	6.6	250	15.5		205		23	94.6
Female	19	162	63	24.0055	3800	8.5	205	29	183		45		87.9
Female	18	167	50	17.9282	4000	7.6	210	28	125		58		105
Male	19	170	63	21.7993	5113	7.5	225	23.5		231		4	76.7
Female	18	165	63	23.1405	3200	9.5	165	17	232		42		78.5
Male	18	174	64	21.1389	5789	7.4	245	26.5		222		10	85
Female	18	155	45	18.7305	2632	9.4	164	14.5	226		54		78.5
Female	19	163	48	18.0662	3388	9.5	164	12.5	224		23		76.7
Male	19	179	69	21.5349	5769	7.2	245	18.5		212		19	88.4
Male	19	170	65	22.4913	4350	6.9	235	14		216		1	75.6
Female	18	165	51	18.7328	3526	8.8	198	24	223		39		86.5
Female	19	152	49	21.2084	3041	8.7	175	21	227		42		81.5
Female	19	162	55	20.9572	3093	8.9	166	7.7	212		36		79
Female	18	162	52	19.8141	3044	9.6	166	31.8	216		50		82.7
Female	18	161	47	18.132	3051	8.8	156	16.3	215		50		80.9
Female	19	162	52.5	20.0046	4022	8.7	174	17.6	215		60		89.2
Male	19	171	61	20.8611	5063	7.8	210	20.1		241		4	73.3
Female	19	163	50	18.8189	2700	8.8	185	16	224		36		79.3
Female	18	162	48	18.2899	3388	9.2	166	9.5	231		27		77.8
Female	18	165	54.5	20.0184	3552	8.9	152	7.1	258		44		77.8
Female	19	167	55	19.721	3168	9.4	171	23.1	213		50		83
Female	18	160	52.5	20.5078	3524	9	181	20.8	203		52		88.9
Female	19	161	54	20.8325	3635	8.9	174	19.5	239		50		83.5
Female	18	158	45	18.026	3061	8.9	164	19.4	218		42		80.2
Female	19	168	59	20.9042	3727	9	180	18.7	215		53		86
Female	18	160	44	17.1875	2543	8.8	176	15.5	261		45		75.9
Male	19	166	66	23.9512	3619	7.8	218	13.2		242		12	71.4
Female	19	165	53.5	19.6511	3736	8.4	171	16.8	182		69		99.4
Female	18	164	56	20.8209	2354	9.9	151	18.6	279		62		74.5
Female	18	167	55	19.721	3394	8.8	168	23.1	241		32		81.1
Female	18	161	49	18.9036	3932	9.1	170	24.1	233		52		85.3
Female	19	158	52	20.83	3849	8.2	203	28.3	182		48		92.5
Female	19	164	55	20.4491	2995	9.1	191	23.3	218		35		81.4
Female	19	165	55	20.202	3810	9	176	10	234		33		80.4
Female	19	162	51	19.433	2893	9.3	175	14.5	185		52		79.4
Female	18	158	46	18.4265	3400	9.1	174	24.7	249		47		83.3
Female	18	161	51	19.6752	3441	8.7	180	20.3	268		35		80.2
Male	18	173	55	18.3768	3402	7.6	230	16.3		226		5	70.8
Female	20	156	52	21.3675	2307	8.7	166	24.5	217		34		80.4
Female	20	163	55	20.7008	3274	8.4	193	25	201		63		94.3
Male	18	184	62	18.3129	5560	7	240	22		240		6	80
Female	18	164	59	21.9363	3804	8.4	198	31	229		50		88.7
Female	18	159	59	23.3377	2998	8.5	183	18	222		47		82.1
Female	18	170	65	22.4913	3174	9.6	165	20	263		50		77
Female	19	163	64	24.0882	3458	9.9	162	23.5	224		49		79.9
Female	19	165	60	22.0386	3359	8	202	28	219		66		98.8
Male	19	175	75	24.4898	4406	8	203	9.5		241		0	63.4
Female	18	151	44	19.2974	2611	8.9	173	16	226		59		82
Male	18	177	74	23.6203	4706	6.6	220	8		214		9	83
Female	18	160	53	20.7031	3602	8.5	181	24.5	202		48		90.1
Male	18	173	54	18.0427	4587	7.2	251	11.5		185		15	81.5
Male	18	192	85	23.0577	6406	6.5	251	3.7		218		1	80
Male	17	165	55	20.202	3830	7.5	200	5		231		2	66.2
Female	19	150	42	18.6667	2935	8.4	170	22.2	212		47		83.5
Male	18	175	55	17.9592	4017	7.7	240	28		243		10	78.5
Female	18	158	56	22.4323	2922	9.8	165	20	243		42		76.3
Female	19	171	55	18.8092	4074	9	167	17	208		51		85.5
Male	18	175	73	23.8367	5625	7.3	227	13		244		2	73.6
Female	18	159	55	21.7555	3078	8.2	180	14	207		46		84
Male	19	168	64	22.6757	3509	8.2	200	8		253		5	63.3
Female	18	161	52	20.061	2400	9.4	155	24	229		55		79.6
Female	19	171	65	22.2291	3414	9.5	165	20.5	282		46		76.4
Female	19	169	60	21.0077	3103	8.8	181	26	221		56		85.8
Female	18	158	60	24.0346	3731	8.5	182	16	216		58		86
Female	18	168	62	21.9671	3542	8.9	170	21	214		40		84.9
Female	19	156	60	24.6548	3681	8.4	172	16	207		50		83.9
Female	18	160	64	25	3560	8.4	200	10	218		45		82
Male	19	175	64	20.898	4447	7.6	200	21		241		2	68.7
Female	19	157	49	19.8791	3162	9	160	20	243		37		78.2
Female	19	164	50	18.5901	3556	9.7	170	18	249		40		79.6
Female	19	155	50	20.8117	3488	8.7	170	26	183		50		88.9
Male	18	169	65	22.7583	4340	7.6	235	12		249		2	69.6
Female	19	164	54	20.0773	3501	9.5	165	8	213		37		80.6
Female	18	160	52	20.3125	3252	9.3	175	26	205		42		85
Female	19	158	45	18.026	2975	9.5	180	17	239		53		79.5
Male	18	175	62	20.2449	4815	6.8	275	28		197		20	98.5
Male	19	172	63	21.2953	4753	7.7	230	8		240		11	77
Female	18	160	48	18.75	2850	8.3	185	14.5	204		49		85.1
Male	19	178	62	19.5682	4540	7.2	225	14		224		15	80.4
Female	18	165	50	18.3655	3600	7.9	175	26	204		55		93.1
Male	18	180	76	23.4568	5829	7	250	18		203		8	85
Male	18	171	49	16.7573	3992	7.6	205	4		232		3	64.1
Female	19	158	46	18.4265	3257	9.7	175	1	239		36		70.4
Male	18	182	69	20.8308	6859	7.3	265	28		237		7	82.4
Female	19	159	60	23.7332	3853	9.2	185	14.5	205		57		87.2
Female	18	155	46	19.1467	3265	9.3	155	16.5	216		45		80.3
Female	17	160	46	17.9688	2724	8.8	175	21	243		50		79.9
Male	18	183	55	16.4233	4183	7.2	245	6.5		231		10	74.7
Female	19	154	51	21.5045	3897	9.2	175	18.5	216		47		84.4
Female	18	170	57	19.7232	3416	8.9	180	26.5	208		40		88
Female	18	168	56	19.8413	3747	9.4	170	5	236		40		77
Female	19	157	55	22.3133	3830	8.9	175	21	212		44		85.7
Female	18	158	57	22.8329	3618	9.6	165	26	235		42		82.4
Male	18	182	64	19.3213	5603	6.7	250	1		224		2	76.6
Male	18	166	52	18.8707	4524	7.5	230	11		248		7	72.8
Female	18	171	68	23.255	3842	9.5	170	11	221		47		81.4
Male	19	187	82	23.4493	6473	7	240	12		235		24	91.4
Female	18	159	51	20.1733	3461	9.4	165	23	221		32		82
Male	18	171	55	18.8092	4465	7.2	240	26		229		10	81.4
Female	18	159	46	18.1955	3487	8.7	180	15.5	235		38		82.4
Male	18	168	47	16.6525	4452	7.8	225	6		252		2	65
Male	19	174	53	17.5056	5222	7.6	240	12.5		235		5	72.4
Female	18	156	47	19.313	3339	8.9	165	20	202		53		86.1
Female	19	155	46	19.1467	3506	9.6	175	26	219		34		83.6
Female	18	166	56	20.3223	3089	8.9	165	13	217		35		79.4
Male	20	170	60	20.7612	5811	7.5	220	13		221		2	75
Female	20	170	57	19.7232	4352	8.8	185	3	242		34		76
Female	18	160	46	17.9688	2650	9.9	152	8.3	243		40		70.2
Male	18	178	58	18.3058	4912	7.4	240	7.8		226		3	73.3
Male	21	185	73	21.3294	5887	7	252	11.9		217		11	84.4
Female	18	168	48	17.0068	3149	9.6	170	11.1	185		47		74.2
Female	18	163.5	59	22.0707	3551	8.2	185	27.1	215		52		90
Male	18	175	56	18.2857	4713	7.1	223	19		232		3	73.5
Male	18	178	67.5	21.3041	4706	7.2	222	11.4		211		7	77
Female	19	158	52	20.83	3511	8.6	188	13.1	241		36		82.1
Male	19	177	67	21.3859	4950	7.3	230	25		206		13	87
Male	18	180	108	33.3333	5568	7.9	210	2.1		298		1	56.4
Female	19	162	51.5	19.6235	3595	7.4	210	27.9	182		52		102
Male	19	182	59	17.8119	6033	7	245	14.6		212		11	82.6
Male	18	179	53	16.5413	4400	7.8	235	9.3		251		10	72
Male	18	175	64	20.898	5776	7.2	224	11.6		249		8	77
Female	18	170	59	20.4152	3837	8.9	185	25.8	239		38		84.8
Male	19	172	70	23.6614	4533	7.3	250	14.5		239		15	80.4
Male	19	182	60.5	18.2647	5480	7.2	226	17.3		283		6	72.2
Male	18	174	63	20.8086	4194	6.6	265	16.1		203		12	88.1
Male	18	184	97	28.6508	6047	7.6	250	2.5		275		1	60.8
Female	19	167	50	17.9282	3105	9.7	151	6	185		42		75
Male	20	177	63	20.1092	5050	7	280	14		205		7	85.4
Female	18	163	57	21.4536	2879	8.4	193	11.5	249		45		79.1
Female	18	164	68	25.2826	3580	8.9	173	25.8	227		40		82.2
Female	18	157	46	18.662	2893	9.7	156	9	237		46		75
Male	18	174	74.5	24.6069	4893	7.3	220	9.5		257		2	67.7
Female	17	162	55	20.9572	2917	9	167	13.3	224		18		73.1
Male	19	179	78	24.3438	6513	7.2	255	16		224		20	84.8
Female	18	172	58.5	19.7742	2916	9.1	200	17.4	234		22		76.9
Female	20	160	51.5	20.1172	2810	8.8	160	20.2	223		37		78.8
Male	19	176	98	31.6374	6000	7.3	220	4.5		236		3	67
Female	18	167	52	18.6453	3137	9.5	168	28	222		34		80.4
Female	18	156	51	20.9566	3242	8.1	166	27	193		58		92.8
Female	18	166	50	18.1449	2763	7.7	190	21	193		57		92.1
Female	19	163	50	18.8189	3157	7.6	210	12	197		58		94.5
Female	19	162	50	19.052	2757	8.6	160	11	244		50		77.4
Male	18	175	72	23.5102	5449	7.2	210	14		218		1	75
Female	18	167	50	17.9282	3062	9.1	165	14	228		48		79
Female	18	166	54	19.5965	3260	8.7	175	12	183		49		83.8
Female	19	158	47	18.8271	3035	8.3	160	21	219		36		81.1
Female	18	159	51	20.1733	2762	9.2	170	18	215		42		79.7
Male	18	178	69	21.7776	5300	6.9	240	17		244		3	77.4
Female	19	165	50	18.3655	3451	8.7	172	26	224		47		86.6
Female	19	165	50	18.3655	2353	8.8	160	13	235		36		75.1
Male	18	169	58	20.3074	4791	7.1	190	14		241		2	66.8
Female	19	167	48	17.2111	3112	9.4	170	26	253		44		79.2
Female	18	165	52	19.1001	3570	8.6	168	17	219		46		83.8
Male	18	185	80	23.3747	5133	7.5	205	17		244		1	68
Male	19	175	63	20.5714	5244	6.8	240	27		240		4	81
Female	18	160	50	19.5312	3368	8.9	150	20	207		42		82.7
Male	19	175	65	21.2245	4742	6.8	217	15		216		11	83.2
Male	18	177	61	19.4708	4054	7.3	240	23		231		1	73.5
Male	18	172	59	19.9432	500	6.8	250	19		215		10	72
Female	19	165	60	22.0386	3151	9	170	17	221		51		81.5
Male	18	172	56	18.9292	4237	7.5	205	16		241		2	68.9
Female	19	163	48	18.0662	3454	8.1	195	10	217		56		88.6
Female	19	162	51	19.433	2958	9	170	17	227		44		79.3
Female	18	162	48	18.2899	3510	8.8	165	20	218		40		83
Female	19	158	48	19.2277	2488	9.2	160	16	227		38		76
Female	19	163	60	22.5827	3112	8.2	200	17	193		34		87.4
Female	18	163	53	19.9481	2849	8.2	180	16	208		45		83.4
Female	18	160	52	20.3125	3296	9	167	18	223		41		80.3
Male	18	180	60	18.5185	5432	6.9	250	17		236		21	90.6
Female	18	173	53	17.7086	4126	8.6	180	18	201		46		87.8
Male	18	178	65	20.5151	5412	7.8	220	13		242		0	72.6
Female	19	172	55	18.5911	3863	8.9	185	26	238		43		85.2
Female	18	165	51	18.7328	3973	9.1	170	3.5	216		36		77.6
Male	19	179	59	18.4139	5399	7	272	7		209		2	79.9
Male	19	180	67	20.679	5530	6.7	247	11.7		203		2	82.8
Female	19	165	51	18.7328	3504	9.5	178	15.5	237		50		82.1
Female	18	166	53	19.2336	3505	9.3	178	21.3	241		50		83.2
Female	18	169	55	19.257	3523	8.7	191	17.5	301		50		73.8
Female	19	154	54	22.7694	3689	8.9	163	15.3	229		50		83.1
Female	18	161	51	19.6752	2684	9.4	173	12.5	234		44		76.8
Female	18	167	66	23.6652	3935	8.9	155	19	227		36		81.6
Female	18	162	53	20.1951	3634	8.7	202	21	233		44		86.2
Female	19	164	50	18.5901	3381	8.7	185	9	232		30		80.5
Male	19	179	52	16.2292	4900	7	245	17.5		225		1	73.7
Female	19	159	63	24.9199	3284	10	165	9.5	253		35		70.7
Female	18	160	46	17.9688	3395	9.6	173	19.2	233		44		80.9
Female	19	156	43	17.6693	3020	8.8	160	20	184		37		79.4
Female	18	166	60	21.7738	3519	8.7	175	21	217		36		85.3
Male	18	170	73	25.2595	4589	7.8	233	4		242		0	65.2
Female	18	155	65	27.0552	3889	9	168	23	240		33		78.4
Female	19	161	51	19.6752	3478	8	185	9.6	205		51		87.9
Male	18	171	54	18.4672	4773	7	240	14.5		204		14	85.3
Male	18	167	54	19.3625	5078	6.9	260	13.5		238		9	83.3
Female	19	157	55	22.3133	3430	10	158	23.7	231		43		80.6
Male	19	186	85	24.5693	7345	8.5	202	21		266		0	65.1
Female	18	161	51	19.6752	3396	10.3	168	30.5	274		32		76.8
Female	19	156	75	30.8185	3519	9.4	163	18	248		31		72.6
Male	19	172	70	23.6614	4923	7.5	215	5.5		258		3	69.7
Female	17	156	57	23.4221	3588	8.2	185	11	235		44		83.2
Female	19	162	56	21.3382	3039	8.5	155	22	215		35		81.1
Female	19	167	54	19.3625	3583	9.2	167	24	211		34		84.3
Male	17	178	64	20.1995	5400	7.4	212	23.5		184		8	80.9
Female	20	168	60	21.2585	3459	9.1	162	16.2	211		36		82.4
Male	18	173	58	19.3792	4550	8	228	8		238		5	70.8
Male	18	176	50	16.1415	4436	7.2	240	9.2		233		8	72.6
Female	19	163	55	20.7008	2424	9.8	155	16.2	267		25		69
Female	19	162	52	19.8141	3199	9.1	174	21	215		56		85
Female	19	165	52	19.1001	3657	8.6	155	8	221		34		80.4
Female	18	160	48	18.75	2797	8.9	195	26.2	214		38		84.1
Female	18	160	48	18.75	3199	9.2	172	22	228		59		84.3
Male	19	180	61.5	18.9815	4294	7.6	225	5		185		0	69.5
Female	18	165	55	20.202	4771	8.6	186	15	219		54		85.9
Female	18	153	47	20.0777	3693	8.9	183	11	243		45		81.6
Male	18	176	70	22.5981	4771	7.4	210	12.1		241		0	69.8
Male	18	178	85	26.8274	6600	7.2	253	11		254		0	70.8
Male	18	185	75	21.9138	5130	8.2	195	7		244		0	67
Female	19	173	57	19.0451	4005	8.5	193	22	201		50		90.1
Female	19	172	58	19.6052	3697	8.4	182	14	219		46		84.8
Female	19	150	45	20	3946	9.3	163	19	243		49		79.3
Female	18	161	70	27.0051	4472	9.1	181	16.4	229		39		79.8
Female	18	163	48	18.0662	3326	9.7	177	25	207		49		85.3
Female	18	158	62.5	25.0361	3668	9.1	188	15.8	241		41		79.1
Female	18	170	65	22.4913	3483	8.7	160	15	245		32		79.6
Female	18	157	49	19.8791	3432	9.1	153	11.5	229		29		79
Female	19	172	59.5	20.1122	2932	9	163	15	226		41		78.1
Female	18	161	51	19.6752	2979	8.8	172	19	268		42		76.9
Female	18	160	50	19.5312	5158	9.6	193	17	244		50		82.2
Female	19	166	53	19.2336	3349	8.2	178	12	216		52		85.1
Female	18	170	55	19.0311	2230	9.3	163	13	229		43		75.6
Female	17	152	51	22.0741	2804	9.5	163	17	241		25		73.8
Male	19	176	63.5	20.4997	5180	6.8	268	18		239		10	86.9
Male	20	170	55	19.0311	3900	7.6	237	11.8		241		0	68.6
Male	18	176	74	23.8895	5408	7.4	247	21		184		10	83.5
Female	18	167	64	22.9481	4936	9	177	23	216		40		85.4
Female	19	160	43	16.7969	2334	9.4	160	17	238		30		70.9
Female	19	157	56	22.719	2909	8.4	175	18	225		48		81.3
Female	18	174	55	18.1662	3807	9.3	165	29	225		36		83.4
Male	18	179	75	23.4075	5872	7.4	220	22.5		231		0	76
Female	18	165	50	18.3655	4085	8.4	190	19.8	206		52		89.1
Male	18	175	60	19.5918	4780	7.2	233	21.2		236		14	81.5
Male	18	182	65	19.6232	4579	6.6	254	11.5		197		17	91.8
Female	19	159	68	26.8977	3018	9.4	160	5.2	261		40		69.4
Female	18	160	49	19.1406	3046	8.2	185	19	197		49		87.5
Female	19	165	53	19.4674	4039	8.2	168	25	204		49		90
Male	19	175	75	24.4898	5204	7.5	160	13.4		271		0	61.4
Male	19	167	55	19.721	3697	7	230	15.3		224		15	80.4
Female	18	162	50	19.052	3614	7.1	190	18	186		49		96.8
Female	18	161	52	20.061	4333	9.8	175	12.8	265		50		78.3
Female	18	165	50	18.3655	3137	8.1	207	14.3	205		61		90.2
Female	18	162	53	20.1951	3470	8.5	178	26	273		51		83.9
Male	18	175	62	20.2449	4728	6.9	230	5		217		19	84.8
Male	19	178	70	22.0932	4318	7.1	250	4.5		215		22	86
Female	18	174	63	20.8086	3511	7.6	160	12.6	229		53		87.2
Female	18	161	58	22.3757	3511	8.8	155	10	244		40		79.4
Female	20	158	50	20.0288	3680	8.7	165	20.3	198		47		88
Female	18	168	53	18.7783	3205	9.5	140	26.8	247		44		76.2
Female	19	162	53	20.1951	2991	9.2	160	22.5	214		40		80.7
Female	18	169	55	19.257	3235	8.2	195	26	194		58		93.8
Female	18	171	73	24.9649	4285	8.8	175	24.2	247		43		80.5
Male	18	175	70	22.8571	5364	7.1	210	24		259		0	74.3
Female	18	168	64	22.6757	3471	9.5	175	23	263		42		80.6
Male	18	170	58	20.0692	3728	6.8	245	8.8		246		15	80.9
Female	18	151	49	21.4903	3059	7.9	165	23.5	206		45		85.6
Female	18	158	49	19.6283	3458	9.2	175	25.5	249		40		82.5
Female	18	170	50	17.301	3484	9.3	165	8.5	219		42		80.6
Male	19	168	51	18.0697	4125	7.2	215	17.2		221		11	78.4
Female	18	164	51	18.9619	2967	8.6	170	12	231		54		80.6
Male	18	177	80	25.5354	5248	7.7	210	11.5		285		0	64.8
Female	18	160	47	18.3594	3037	9.2	145	23	185		43		76.8
Male	19	170	60	20.7612	4855	6.8	200	15.5		224		11	81.1
Male	18	175	66	21.551	4238	7.2	205	21.5		222		11	78.7
Male	18	168	54	19.1327	3956	7.2	230	15.5		217		11	78.7
Female	18	167	50	17.9282	2864	8.9	155	20.5	226		40		78.4
Female	18	164	50	18.5901	2510	8.7	180	16	206		50		82.4
Female	18	163	50	18.8189	3393	8.5	185	11	202		52		87.5
Female	18	163	50	18.8189	3155	9.1	165	17	225		37		79.1
Female	19	160	60	23.4375	2661	8.8	165	23	241		38		78
Female	19	159	44	17.4044	3059	8.3	175	23	222		46		83.6
Male	18	170	81	28.0277	4561	7.6	200	12.6		243		3	59.8
Female	19	167	66	23.6652	3726	8.8	185	23	217		31		85.2
Male	19	177	70	22.3435	5432	7	230	26.8		209		9	86
Female	19	161	49	18.9036	3196	10.5	151	20	184		58		78.8
Female	18	163	56	21.0772	3420	8.5	145	16	234		33		78.8
Male	18	176	66	21.3068	4607	7.4	225	26.5		219		7	78.8
Female	19	161	54	20.8325	3375	8.5	170	19.5	219		42		83.7
Female	18	157	63	25.5588	3282	9.3	170	20	218		34		76.8
Male	18	169	66	23.1084	5113	7.1	210	20		212		8	81.5
Male	18	173	71	23.7228	4508	7.3	200	13		242		2	68.2
Male	18	180	62	19.1358	4362	7.9	230	12		243		2	69.4
Female	19	174	61	20.148	3938	8.8	170	19	211		36		84
Female	18	160	55	21.4844	3286	10.2	160	18.5	273		40		73.5
Female	19	160	56	21.875	3490	8.5	190	16.6	237		39		83.7
Male	19	175	61	19.9184	4485	6.6	245	9.5		243		13	82.8
Female	18	160	77.5	30.2734	2675	10.4	130	17	313		29		48.6
Female	18	160	61	23.8281	4729	9.2	175	27	263		45		82.2
Male	18	170	56	19.3772	4971	7.2	235	23		233		17	84.9
Female	19	156	47	19.313	3404	8.8	182	21	195		46		89.3
Male	20	180	115	35.4938	5396	9.3	180	-4		388		0	34
Male	18	176	86	27.7634	6243	7.5	223	9		241		1	69
Female	20	165	67	24.6097	3877	9.1	170	17.3	214		48		81.2
Female	18	163	50	18.8189	3618	8.3	185	25.3	206		52		90.5
Male	18	181	66	20.1459	5859	7.3	253	28		218		21	91.6
Female	19	160	52	20.3125	3635	8.9	188	17.3	212		48		85.9
Male	18	171	70	23.939	4600	7.9	227	8.5		240		3	70
Male	19	178	59	18.6214	5091	7.5	230	18		218		7	79.2
Female	18	162	52	19.8141	3503	9.7	153	22.3	241		52		81.6
Male	19	164	51	18.9619	4922	7.8	208	1		226		4	68.3
Female	18	162	53	20.1951	3690	8.7	160	18.5	202		57		88.6
Male	18	162	53	20.1951	3992	7.5	208	1.2		249		14	71.5
Male	18	183	75	22.3954	6972	7	258	12		205		3	80.5
Female	19	168	53	18.7783	3544	8.6	173	24.8	227		0		77.7
Male	18	178	59	18.6214	5029	7.6	210	1.5		212		12	76.8
Female	18	163	50	18.8189	3641	9.6	170	14.5	249		49		80.1
Male	19	176	71.5	23.0824	5397	7.5	197	12		208		3	72.2
Male	18	174	56	18.4965	5009	7.4	237	14		239		9	78.7
Female	18	168	57	20.1956	3486	8.8	181	22.5	232		45		84.8
Male	19	164	64	23.7954	4770	7.5	216	15.2		265		2	69.4
Male	18	171	64	21.8871	4646	8	218	13.2		232		2	70.5
Female	18	163	52	19.5717	3745	8.6	196	18.5	207		44		87.8
Female	18	155	47	19.563	3763	9.3	156	17.6	206		46		83.8
Female	18	166	52	18.8707	3486	7.7	208	9.3	181		51		93.9
Female	18	163	51	19.1953	2571	9.1	177	17.5	208		38		80.3
Female	20	160	46	17.9688	3392	9.5	140	21.5	227		52		79
Male	18	171	61.5	21.0321	4465	7.3	240	19		223		2	73.8
Male	18	171	54	18.4672	4469	7	243	12.1		203		3	76.8
Male	18	161	59	22.7615	3723	7.7	225	18.5		241		11	75.1
Male	17	178	74	23.3556	5756	7.5	230	-14		241		1	65.8
Male	18	168	61	21.6128	4920	7	232	23		236		16	85.8
Female	19	154	50	21.0828	2858	9.2	130	5	243		41		64.8
Female	18	166	45	16.3304	2807	8.7	175	12.7	217		44		78
Female	18	166	55	19.9594	3024	9.7	151	9.5	243		43		72.2
Female	19	162	51	19.433	3601	8.5	196	24	223		47		88.1
Female	18	160	53	20.7031	3088	7.9	188	19	206		51		87
Female	18	157	55	22.3133	2948	9.4	170	12.5	231		43		77.3
Male	19	177	78	24.8971	5075	6.8	250	18		235		3	76.8
Male	18	180	80	24.6914	5319	7.4	240	0		241		0	66.2
Male	18	181	84	25.6402	4876	8.1	187	13.7		245		0	57.9
Male	18	181	72	21.9774	5751	8	238	21		265		0	72.3
Female	19	162	61	23.2434	3658	9	182	27.7	241		36		83
Male	19	165	62	22.7732	4000	8	225	21.5		253		0	69.1
Female	18	158	48	19.2277	3476	8.9	178	29	183		46		88.6
Female	18	161	48	18.5178	3297	7.9	191	18	205		52		88
Male	19	179	59	18.4139	4183	7.4	238	16		209		9	78.9
Female	18	150	55	24.4444	3463	9	165	23	233		54		81.9
Female	19	159	50	19.7777	3864	9	180	19	237		38		82.2
Female	18	153	50	21.3593	3199	8.7	170	23	221		38		82.4
Female	19	168	65	23.03	3394	9.6	148	7	226		42		76.7
Female	18	167	64	22.9481	3502	9.4	172	13	185		44		81
Male	18	172	54	18.2531	4166	7.4	240	25		255		5	73.4
Female	18	157	47	19.0677	2356	9.1	156	14	237		39		74.7
Female	19	158	51	20.4294	3299	8.8	185	26.5	212		53		86.5
Female	18	170	59	20.4152	3566	8.4	192	25	222		33		86.2
Male	19	169	65	22.7583	4120	8.2	235	16		247		2	68.8
Male	19	174	74	24.4418	4459	7.5	230	13		209		12	77.2
Male	18	175	68	22.2041	4966	6.8	250	33		229		6	83.5
Female	18	151	42	18.4202	2811	8.6	170	14.5	212		36		80
Female	19	159	54	21.3599	2750	9	175	22	213		46		81.6
Female	19	160	55	21.4844	3347	9.3	180	27	215		23		81.3
Male	19	184	75	22.1526	5271	7.8	233	20.4		254		0	73.3
Male	19	182	70	21.1327	5754	7.8	213	15.5		234		0	73
Female	18	168	50	17.7154	3842	9	173	15.1	243		32		80.2
Male	18	185	57	16.6545	4962	7.5	246	20.4		233		14	80.1
Male	18	175	62	20.2449	5508	7.3	247	6		187		29	101.6
Female	18	165	50	18.3655	3536	9.3	147	21	196		48		85.5
Female	18	163	50	18.8189	3590	9.3	157	16	194		40		85.2
Male	18	165	57	20.9366	4202	7.3	240	22		214		5	76.9
Female	19	162	66	25.1486	2846	9.2	160	15	184		56		77.2
Female	19	170	50	17.301	4013	8.4	208	21.7	187		45		93.9
Male	18	172	60	20.2812	4261	7.3	217	22		185		13	80.1
Male	19	171	65	22.2291	4084	7.8	200	16		282		0	62.4
Female	19	171	67	22.913	3345	8.5	180	14.1	218		47		83.1
Female	17	167	70	25.0995	3330	9.3	175	4.3	256		31		69.7
Male	18	176	51	16.4644	5153	7.7	227	11.7		217		23	85.6
Male	18	174	55	18.1662	5793	7.4	237	18.7		215		15	84.6
Female	18	163	50	18.8189	3322	10.1	156	10.3	248		31		74.1
Male	18	179	56	17.4776	4900	7.2	247	21.5		211		5	75.9
Female	18	170	62	21.4533	3640	9.2	183	20.9	243		49		83.4
Male	18	181	72	21.9774	5725	7.5	230	5		238		0	72.6
Female	18	159	50	19.7777	3785	9.8	163	18	213		40		81.8
Female	19	165	53	19.4674	3445	8.5	183	10.3	212		54		86.7
Male	19	177	70	22.3435	5381	8.2	208	12		274		0	66.6
Male	20	170	55	19.0311	5439	7.7	220	4.5		234		5	73.2
Female	20	157	54	21.9076	4163	9.5	165	22.5	214		50		84.9
Male	19	176	65	20.984	5852	7.1	245	-3.5		242		29	88.2
Female	19	168	58	20.5499	4404	8.4	183	6.2	194		42		87.2
Male	19	180	72	22.2222	4648	6.9	252	20		238		14	84.3
Female	18	175	60	19.5918	4239	9.5	158	20	229		44		81.4
Male	20	180	62	19.1358	5075	7.2	263	20		222		6	81.1
Female	19	162	55	20.9572	3962	9.3	158	19.5	261		30		77.6
Female	18	164	59	21.9363	3189	8	190	19	216		49		86.8
Female	18	171	52	17.7832	3718	9	150	24	224		43		82.5
Male	18	184	75	22.1526	5669	7.5	250	25.5		240		17	86.6
Male	18	178	82	25.8806	6015	8.1	210	6		236		3	68
Male	18	174	63	20.8086	4956	7.2	220	10.5		233		5	74
Female	19	158	53	21.2306	2589	9.3	175	14.3	207		35		79.1
Male	18	179	64	19.9744	3790	7.8	205	10		229		1	66.9
Female	18	158	58	23.2335	2293	9.1	165	21	218		52		79.3
Female	19	159	59	23.3377	3443	9.9	148	16.7	263		42		75.8
Female	18	166	49	17.782	3831	9.1	190	16.3	252		46		81.9
Male	18	181	64	19.5354	5134	7.6	215	7.5		235		7	75.2
Female	19	159	47	18.591	3365	9.3	160	9	216		42		80.8
Female	18	153	52	22.2137	2741	9	180	20.5	214		46		81.3
Female	18	166	51	18.5078	3402	9.2	182	26	221		40		85.4
Male	19	170	66	22.8374	4670	7.7	200	15		247		1	68.2
Female	18	158	54	21.6311	3066	9.3	153	22	227		39		78.3
Female	19	164	49	18.2183	3244	9.1	150	20	233		52		79.4
Male	18	168	60	21.2585	3949	7.8	235	28		266		0	70.1
Female	19	158	55	22.0317	3242	9.1	160	20	241		37		78.2
Female	18	160	57	22.2656	3160	8.9	180	14	240		51		80.5
Female	19	168	52	18.424	3171	9.5	150	9.5	258		36		73
Male	18	179	72	22.4712	5910	7.3	232	12		238		2	74.2
Male	18	165	84	30.854	4069	7.9	200	12.7		309		0	54
Male	17	171	65	22.2291	4290	8.1	205	18		262		0	66.5
Female	18	161	59	22.7615	3668	9	168	20.2	227		48		83
Female	19	163	49	18.4425	3583	8.4	185	22	209		40		87.5
Female	18	163	49	18.4425	2865	8.7	185	15	183		36		81.8
Female	18	160	47	18.3594	3049	8	202	18	211		41		85.7
Male	19	170	59	20.4152	4522	7.1	220	15.5		217		15	81.2
Female	17	164	79	29.3724	4007	9.3	153	15.6	241		30		71.4
Male	18	184	85	25.1063	5111	7.7	237	15.8		256		0	70
Female	19	156	45	18.4911	3132	8.3	168	19.3	203		56		87
Female	18	158	52	20.83	3448	9.1	155	15.1	184		52		83
Male	18	171	76.5	26.1619	5160	7.7	227	11.9		249		0	69.2
Female	18	157	55	22.3133	1920	8.7	175	8	215		45		74.8
Female	18	155	49	20.3954	2614	9.5	145	18.2	246		54		74.7
Male	19	174	56	18.4965	4031	6.7	268	10.4		227		10	84
Male	18	181	66	20.1459	5129	7.3	240	12.4		217		15	84.4
Male	18	175	66	21.551	4628	7.5	237	3.7		258		0	69.2
Female	18	164	69	25.6544	2059	9.1	190	22.3	240		37		74.3
Female	18	159	45	17.7999	3326	8.6	187	6	184		44		81.5
Male	18	183	75	22.3954	5533	6.8	255	11.5		214		2	81
Male	18	170	56	19.3772	4386	7.1	245	17		207		7	79.6
Male	18	170	66	22.8374	4978	7	252	11.8		201		10	86.3
Male	18	173	61	20.3816	4053	7.6	200	8.3		253		1	64.7
Female	19	160	44	17.1875	3104	9.7	145	17.5	212		26		74.8
Male	18	173	54	18.0427	4853	7.3	248	12.1		255		14	80.1
Male	19	172	65	21.9713	4671	7.2	220	2.8		218		5	72
Male	18	164	74	27.5134	4254	7.1	235	18.8		241		15	76.5
Female	17	150	43	19.1111	1743	10.3	157	8.9	235		38		61.8
Male	19	173	78	26.0617	4697	7.7	213	25.8		242		0	68.5
Male	19	178	78	24.6181	6302	7.5	190	6.8		233		1	65.4
Female	18	155	51	21.2279	3512	9	154	27	253		26		80.2
Female	17	162	62	23.6244	3070	9.2	167	22.7	213		34		80.8
Female	17	154	49	20.6612	2542	9.3	165	23	212		37		79.3
Female	18	170	58	20.0692	3421	9.2	165	24	249		46		82.3
Female	18	157	43	17.4449	3391	8.3	180	17	211		56		87.7
Female	18	158	62	24.8358	3907	8.4	175	17	218		54		83.3
Male	18	170	51	17.6471	4822	7.2	220	19		214		12	79.5
Female	19	167	55	19.721	3304	9	175	26	256		49		82.2
Male	19	174	78	25.763	5027	7.4	195	7		249		2	64.5
Male	18	174	60	19.8177	3353	7.1	210	1		226		2	65.2
Female	18	161	47	18.132	3421	8.2	190	16	201		40		88.3
Female	18	160	47	18.3594	2851	9	162	9	236		53		77.6
Female	18	167	59	21.1553	3941	8.8	150	20.5	267		39		77.4
Female	18	160	50	19.5312	3689	8.2	183	26	211		56		91
Female	18	159	46	18.1955	3500	8.4	165	19	184		46		84.4
Male	19	173	58	19.3792	3504	7.7	200	6.5		254		3	63.3
Female	19	165	49	17.9982	3521	7.8	188	22	182		51		91.5
Female	18	150	38	16.8889	2889	8.6	173	24	229		56		81.1
Female	18	163	60	22.5827	3611	8.7	188	23	219		50		87.2
Female	18	165	48	17.6309	3566	8.2	173	14	216		62		90.6
Female	18	158	46	18.4265	3012	9.8	160	19	245		41		75.8
Female	19	155	50	20.8117	3449	9.6	155	27	237		35		81
Female	18	170	50	17.301	2671	8.8	185	10	217		40		79.6
Female	19	168	48	17.0068	2817	8.2	170	19	232		50		78.3
Female	18	153	43	18.369	2689	8.4	178	17	207		59		85.8
Female	19	155	48	19.9792	3434	8.2	188	23	188		45		93.3
Female	18	164	48	17.8465	3130	8	190	19	213		51		86
Male	18	173	68	22.7204	4416	6.8	260	20.5		239		2	77.4
Female	18	153	53	22.6409	3417	9	160	18	253		39		79.6
Female	20	161	70	27.0051	3391	8.8	165	14	256		22		72.3
Female	19	163	64	24.0882	3501	8.2	192	21	191		61		93
Female	19	153	47	20.0777	3401	8.5	170	27	231		56		88
Female	20	160	48	18.75	3122	8.2	193	21	236		50		83.3
Female	19	165	55	20.202	3622	9	192	18	224		51		85.2
Female	19	158	45	18.026	3484	7.8	200	27	208		57		94
Female	18	156	61	25.0657	3262	9.3	165	21	262		37		73.8
Female	18	155	50	20.8117	3945	9.5	155	18	223		58		84.6
Female	18	170	60	20.7612	3838	9.2	193	15	223		64		90.7
Female	18	163	40	15.0551	3305	9.8	177	20	227		47		77.5
Female	19	170	58	20.0692	2991	9.1	170	27	243		29		78.9
Female	18	165	52	19.1001	3743	8.4	192	6	234		45		83.1
Female	18	153	59	25.204	4002	9.2	155	11	228		41		76.8
Female	18	163	56	21.0772	3987	8.2	170	13	204		34		86
Female	19	158	53	21.2306	3588	9.1	181	15	216		37		83.6
Female	19	156	49	20.1348	2871	8.6	185	21.5	219		54		83.6
Female	18	166	60	21.7738	3427	9.3	155	19	221		41		81.6
Male	18	170	55	19.0311	3311	7.1	210	17		241		11	74.1
Female	18	168	55	19.487	3897	8.3	200	27	183		57		93
Female	19	158	50	20.0288	3895	8.7	170	27	184		52		87.4
Female	18	163	51	19.1953	2938	9.3	170	21	245		40		77.8
Female	19	164	58	21.5645	3958	9.1	163	17	213		41		83.2
Female	19	151	45	19.736	3280	9	175	22	227		55		83.3
Male	19	173	60	20.0474	4983	7.5	205	21		221		6	76
Female	19	161	52	20.061	2406	9.3	155	27	185		36		77.6
Female	19	156	64	26.2985	3687	9.1	160	18	236		40		78
Female	18	166	52	18.8707	3639	9	167	21	238		50		83.2
Male	18	169	50	17.5064	3561	7.1	240	12		219		8	72.5
Female	19	165	60	22.0386	3501	8.6	160	22	219		35		83.1
Female	18	166	60	21.7738	3707	9.2	165	10	235		36		79.2
Male	18	163	55	20.7008	3381	7.5	215	6		238		6	68.6
Female	18	160	65	25.3906	3770	8.8	190	12	213		32		80.7
Female	19	158	49	19.6283	3278	7.3	175	22	208		53		90.8
Female	19	156	51	20.9566	2758	9	155	24	223		45		80
Female	19	171	59	20.1771	4014	8.5	210	15	184		43		86.4
Female	19	178	60	18.937	3676	8.4	198	5	254		30		78.6
Female	19	163	50	18.8189	3512	7.8	200	16	195		64		98.4
Female	18	161	45	17.3604	3466	8.5	207	26	183		42		91.2
Female	19	158	45	18.026	3045	9.5	150	10	232		42		75
Female	18	158	50	20.0288	3365	8.7	185	18	221		56		86.3
Female	18	166	65	23.5883	4163	8.6	190	27	185		34		85.7
Female	18	167	56	20.0796	3486	8.7	200	18	218		46		86
Female	19	164	56	20.8209	3586	8.4	190	22	218		33		85.2
Female	18	162	44	16.7657	2709	10.1	160	1	239		78		76.9
Female	18	160	47	18.3594	3779	8.6	195	27	231		56		89.4
Female	19	160	48	18.75	2462	9.4	155	14	267		39		71.8
Male	18	164	64	23.7954	4191	7.7	210	25		222		2	73.5
Female	19	176	63	20.3383	4321	8.7	160	18	213		31		83
Female	18	158	62	24.8358	3074	9	173	19	251		37		74.4
Female	18	161	55	21.2183	3139	8.4	192	21	216		34		83.4
Male	18	173	55	18.3768	4319	14.1	205	20		242		7	56.3
Female	18	160	43	16.7969	2812	8.7	180	26	206		50		82.9
Female	18	163	57	21.4536	3338	9	175	18	215		45		83.1
Female	20	160	40	15.625	3213	9	185	19	227		46		78.8
Female	18	167	58	20.7967	3473	9	190	21	221		40		84.8
Female	18	162	57	21.7193	2674	9.4	180	18	257		47		76.2
Female	18	167	84	30.1194	4626	9.2	182	17	236		37		75.4
Female	19	167	50	17.9282	3133	8.9	200	13	204		52		85.8
Female	18	163	48	18.0662	3256	8	175	17	216		46		85
Female	18	165	56	20.5693	3447	8.1	198	27	226		51		89.1
Male	19	178	62	19.5682	5042	7.3	215	16		208		1	76.4
Female	18	162	50	19.052	3597	8.7	185	19	234		52		85.4
Male	18	165	55	20.202	4008	7.5	220	6		239		13	75.7
Female	19	157	46	18.662	3524	8.7	200	16	203		57		90.6
Female	19	158	47	18.8271	2713	8.3	200	18	214		39		83.1
Female	18	166	47	17.0562	3211	8.9	190	20	224		63		86
Female	19	168	55	19.487	3621	9.3	200	18	206		54		88.3
Female	18	156	44	18.0802	2444	9.1	183	15	242		51		77.7
Female	18	175	66	21.551	5358	9.3	177	26	225		49		85.7
Female	18	171	56	19.1512	3953	7.8	185	10	212		41		86
Male	19	183	74	22.0968	5309	7.2	250	15		226		2	76.8
Female	19	163	56	21.0772	3836	8.2	160	20	222		50		85.1
Female	19	162	55	20.9572	3125	9	151	22	221		43		79.5
Male	18	167	55	19.721	4411	6.7	240	10		184		6	79.4
Male	19	174	56	18.4965	3716	6.9	235	17		217		13	81.7
Female	19	162	56	21.3382	3210	8.8	165	21	223		41		81.3
Male	18	182	70	21.1327	5954	7.2	255	25		222		2	79.6
Female	18	158	49	19.6283	3417	8	200	26	197		62		99
Female	18	168	56	19.8413	4394	8.1	188	23	215		61		92.5
Female	18	166	57	20.6852	3317	7.6	195	25	224		30		88.4
Male	19	171	64	21.8871	4522	7.5	200	0		246		9	67.2
Male	18	176	65	20.984	4286	7.9	210	25		242		8	73.9
Male	21	166	52	18.8707	3949	6.6	220	7		181		17	89.1
Female	18	161	47	18.132	2193	9	170	26	240		29		76.5
Female	18	162	46	17.5278	3562	8.3	185	20	203		41		88.4
Female	18	160	45	17.5781	2919	8.8	191	10	243		32		75.2
Male	18	183	60	17.9163	4183	7.3	250	21		241		2	72.4
Male	19	170	56	19.3772	3806	6.9	235	18		231		10	79.9
Female	18	167	55	19.721	3412	9.3	180	20	229		41		82.8
Female	19	163	50	18.8189	3085	8.4	190	21	223		54		85.1
Male	18	175	57	18.6122	4295	6.9	245	14		227		9	80.5
Male	18	165	52	19.1001	3542	7.4	235	12		221		23	84.3
Female	17	168	58	20.5499	3652	7.7	195	4	243		48		82.4
Female	18	166	57	20.6852	2834	7.8	193	13	218		44		82.7
Male	19	171	62	21.2031	3881	7.3	200	11		252		3	66
Female	17	160	64	25	3403	9.2	145	25	237		45		77.1
Male	18	170	65	22.4913	4249	7.9	210	25		259		2	69.9
Male	18	170	63	21.7993	3910	7.6	210	22		229		13	78
Female	19	160	55	21.4844	2459	9.1	175	27	215		58		85.2
Female	18	160	52	20.3125	3564	9.5	145	18	265		38		75
Female	19	158	48	19.2277	3338	8.7	190	21	206		53		87.7
Male	19	175	55	17.9592	4145	6.9	225	15		216		21	86.8
Female	18	158	49	19.6283	2666	9	170	21	226		54		81
Female	18	160	54	21.0938	3656	8.1	202	18	197		60		95.3
Female	19	162	51	19.433	3746	9.1	167	20	245		52		82.4
Female	19	165	55	20.202	3762	8.1	205	26	202		53		93.5
Female	18	158	46	18.4265	3684	8.1	183	12	191		45		89.6
Female	18	163	53	19.9481	4334	7.5	200	18	215		60		95.8
Female	18	168	53	18.7783	3302	8.8	180	13	215		47		83.1
Female	19	164	56	20.8209	3298	9	175	21	211		54		84.8
Female	18	161	54	20.8325	3856	8.8	160	13	182		67		95.4
Female	18	156	45	18.4911	2845	8.6	160	14	219		33		78
Female	18	158	53	21.2306	3063	9.1	170	20	221		50		81.1
Female	19	162	51	19.433	3472	8.4	190	19	232		57		87.3
Female	18	165	61	22.4059	3421	9.7	165	27	185		36		82.2
Female	18	158	51	20.4294	2838	10.2	140	5	249		45		67.2
Male	18	165	50	18.3655	3666	7.2	210	10		227		5	70.2
Male	18	168	60	21.2585	4929	8.4	195	12		243		3	64.5
Female	18	168	53	18.7783	2879	8.8	180	6	226		48		78.6
Female	18	158	46	18.4265	2703	8.5	188	14	228		48		81
Female	18	158	51	20.4294	3262	8.2	185	14	217		42		83.6
Female	19	161	47	18.132	3280	8.3	195	11	187		38		88.6
Female	18	153	47	20.0777	2435	8.4	182	6	232		56		80
Female	18	152	45	19.4771	2934	8.5	160	19	223		40		80.3
Male	19	169	55	19.257	4592	7.5	235	26		225		12	82.5
Male	18	177	58	18.5132	4408	6.8	230	23		181		24	98
Female	19	164	55	20.4491	3402	8	177	24	222		40		87.5
Female	17	173	60	20.0474	4543	7.7	188	14.5	204		42		90.3
Female	19	160	56	21.875	2644	9.7	165	21	224		42		77.9
Female	19	162	50	19.052	2921	8.2	164	13.4	216		52		82.5
Male	18	176	66	21.3068	4082	8.2	212	11		244		10	73.2
Male	18	176	53	17.11	3810	7	243	22.5		183		8	77.1
Female	18	162	45	17.1468	2477	9.2	171	13.2	223		40		73.8
Female	18	168	54	19.1327	3092	9	185	7.2	246		54		78.9
Male	18	175	65	21.2245	4700	6.2	290	15		183		24	97.3
Female	19	160	45	17.5781	2739	8.4	195	6.6	194		44		84.5
Female	19	172	59	19.9432	3471	7.9	210	22.5	212		52		92
Male	18	162	62	23.6244	4316	7.3	203	6		224		12	76.2
Female	18	165	76	27.9155	3363	9.9	157	16.2	405		0		52.8
Male	19	183	78	23.2912	5706	7.1	220	9		223		0	74.8
Female	18	159	45	17.7999	2550	8.9	170	26.7	217		40		81.9
Male	18	175	80	26.1224	4065	8.2	194	1.5		262		0	55.8
Female	18	172	57	19.2672	3314	8.4	182	21.9	205		44		86.4
Female	18	150	150	66.6667	500	16.1	50	0	405		0		9
Female	18	163	55	20.7008	3969	7.9	204	20.5	195		51		93
Female	19	176	76	24.5351	4115	8.2	204	17	256		26		79.3
Female	19	152	46	19.91	3018	9.6	162	11.7	234		40		76.2
Male	19	176	58	18.7242	4066	7.3	250	3.5		241		2	68.6
Female	19	166	92	33.3866	3563	8.9	158	16.9	321		30		61.2
Female	18	161	62	23.9188	2993	8.1	172	17.2	229		38		80.5
Male	18	178	86	27.143	4985	7	233	3		249		0	69
Male	19	180	66	20.3704	5136	8	220	14		234		1	72.8
Female	18	158	59	23.634	2826	8.6	182	23.2	209		45		84.4
Male	18	167	75	26.8923	4721	7	242	21.5		219		8	78.3
Male	18	178	81	25.565	5480	7	250	20		224		3	76.1
Female	18	162	62	23.6244	3213	9	170	7.5	236		40		77.8
Female	18	169	76	26.6097	3142	10.6	155	12.6	272		37		64.2
Female	19	158	61	24.4352	3932	8.7	203	27.2	221		44		85.5
Female	19	161	50	19.2894	2829	8.2	192	16.6	219		34		81.3
Male	19	166	53	19.2336	3925	7.1	222	11.2		228		12	77.4
Female	18	173	57	19.0451	4244	8.5	187	17.8	194		48		89.4
Female	18	170	51	17.6471	3940	8.9	187	23	182		48		88.8
Female	18	167	49	17.5697	2333	8.4	160	17	203		56		83.7
Male	18	174	75	24.7721	4073	8.3	195	3.8		289		0	56
Male	19	178	66	20.8307	4335	7.8	208	12		247		0	68.4
Female	19	161	48	18.5178	3283	8.1	178	26.4	193		52		91.5
Male	19	185	74	21.6216	5249	7.1	208	4		251		1	71.6
Male	19	171	58	19.8352	4827	7	255	12.5		235		9	80.5
Female	18	160	76	29.6875	3817	9.4	162	24.2	241		33		73.9
Male	19	173	52	17.3745	4540	6.7	245	10.6		213		5	76.6
Female	17	163	71	26.7229	3896	8.8	185	20.7	212		27		81.3
Male	19	172	71	23.9995	4753	8.2	180	7.5		274		1	54.8
Male	19	174	55	18.1662	4475	7	195	9.9		205		4	71.8
Female	19	163	52	19.5717	2923	8.2	178	19.8	219		27		80.5
Female	18	163	52	19.5717	3853	9.1	151	1	212		0		67.4
Male	18	180	78	24.0741	6001	7.1	225	3.8		232		8	75
Female	18	173	66	22.0522	4219	8.6	190	14.5	213		36		84.9
Male	18	174	74	24.4418	5284	7.7	220	10		248		0	68.8
Male	18	179	73	22.7833	5327	7	250	23.6		246		7	81.5
Female	18	169	69	24.1588	4034	9.2	135	21	239		34		73.1
Female	18	171	53	18.1252	3455	7.9	185	24	183		50		91
Male	19	181	72	21.9774	5102	7.1	272	8.8		204		13	87.3
Female	18	161	50	19.2894	3633	8	190	26.1	194		48		93.5
Male	18	178	75	23.6713	4990	7	215	9.5		247		0	73.3
Male	18	171	57	19.4932	3963	7.4	234	21.6		208		18	84
Female	18	164	55	20.4491	4744	8.3	164	14.6	202		49		87.5
Male	19	171	69	23.597	5284	7.5	202	3		252		1	67.8
Female	18	172	54	18.2531	3214	7.4	191	20	205		48		90.3
Male	18	180	84	25.9259	5139	7.5	203	-2.5		214		1	64.2
Male	18	165	52	19.1001	4866	6.4	254	23.2		196		20	97
Female	19	164	65	24.1672	3820	8.7	183	17.6	197		50		86.3
Male	19	177	61	19.4708	5137	6.8	251	20.7		216		10	87.5
Female	18	165	43	15.7943	3094	8.6	187	15.2	201		47		81.6
Female	18	158	50	20.0288	2751	7.8	165	16.4	211		32		81.1
Male	18	179	80	24.968	5837	7	214	14.4		212		1	74.6
Female	18	162	51	19.433	2921	10.5	170	26.6	261		41		74.1
Female	19	156	54	22.1893	3231	8.4	173	12	213		43		82.2
Female	18	152	59	25.5367	3451	9.4	137	14.3	251		38		71.6
Male	18	173	62	20.7157	4461	6.6	217	12.5		198		6	81.6
Male	18	171	57	19.4932	4744	6.7	242	12.2		241		20	88
Male	19	172	79	26.7036	4608	8.3	165	14.2		251		0	59.4
Male	18	172	62	20.9573	4554	7.1	212	5.9		185		6	73.4
Female	18	172	53	17.9151	4617	8.2	195	18	182		25		86.8
Male	18	178	72	22.7244	4219	6.8	221	9		217		1	74.9
Female	19	167	58	20.7967	3237	7.7	191	26.6	244		44		86.5
Male	18	172	56	18.9292	4029	6.6	257	15.7		184		19	88.2
Male	19	177	55	17.5556	4521	7	231	14		228		10	76.6
Female	19	167	50	17.9282	3129	9.3	167	24.6	405		0		57.5
Male	18	170	61	21.1073	4787	6.3	267	24.5		192		7	90.3
Male	18	171	69	23.597	4646	6.9	251	25.2		183		10	86.8
Male	19	177	75	23.9395	5241	7.4	215	0.5		234		0	68.2
Male	18	185	56	16.3623	5028	7.6	226	24.6		247		0	71.3
Female	19	163	49	18.4425	3425	7.8	210	26	182		54		95.5
Male	19	178	58	18.3058	3408	7.1	210	12.3		185		0	69
Female	19	161	46	17.7462	3568	8	195	15.5	204		31		88.8
Female	17	160	48	18.75	2356	8.5	176	13.6	184		33		77.7
Female	18	167	69	24.7409	3429	7.9	200	25.1	246		46		84.5
Female	18	163	51	19.1953	2993	10	161	26.3	224		24		76.7
Male	18	173	80	26.7299	4740	8.6	203	27.6		305		0	60.5
Female	18	166	63	22.8625	3657	8.7	161	17.6	243		20		74.4
Female	18	155	43	17.898	2111	8.6	165	18.6	233		40		76.7
Female	18	159	51	20.1733	3504	8.6	165	17.6	214		29		82.8
Female	19	162	54	20.5761	3362	8.3	194	13.2	231		40		83.4
Male	18	163	58	21.83	5190	7.4	198	14		233		3	71.4
Female	18	153	45	19.2234	3495	9	50	13.7	405		0		51.4
Male	18	175	53	17.3061	3443	6.8	197	6.3		222		19	75.8
Female	20	156	52	21.3675	3373	9	162	21.5	204		41		85.1
Female	19	162	51	19.433	3251	8.2	181	22.4	183		45		86.5
Male	19	171	55	18.8092	3747	6.8	247	15		219		7	78.9
Male	18	178	65	20.5151	5147	7.1	230	16.1		221		14	84.2
Female	19	159	74	29.271	3893	8.2	182	18.4	227		43		79
Female	18	175	52	16.9796	3530	8.3	155	11.5	215		51		81.5
Female	18	157	45	18.2563	3195	9.2	162	30	184		60		86.3
Female	19	169	54	18.9069	3510	8.3	185	15	196		42		88.8
Female	18	170	51	17.6471	3148	9	135	15	236		50		73.9
Female	18	169	51	17.8565	2790	9.4	155	21	252		43		75.6
Female	18	162	48	18.2899	2560	9.4	157	22	266		38		73.6
Female	18	155	46	19.1467	2746	9	160	18	219		35		77.7
Male	19	173	55	18.3768	4969	7.1	205	10		216		9	78
Female	18	163	60	22.5827	3914	9	173	18.5	263		40		79.8
Female	19	164	54	20.0773	3226	8.5	177	15	252		50		80.3
Female	19	160	49	19.1406	4361	8.5	185	23	237		42		85
Female	19	159	50	19.7777	2659	8.8	152	24	205		48		82.1
Female	18	171	56	19.1512	3954	9.7	188	13.5	246		30		79.1
Female	19	161	44	16.9747	2156	9	162	-5	227		38		65.1
Female	19	165	55	20.202	2746	9.6	135	21	240		42		71.8
Male	19	186	60	17.343	4304	6.8	240	-1		208		2	68.6
Female	18	153	44	18.7962	2491	9.3	130	7	236		42		68.6
Male	18	180	61	18.8272	5246	6.7	260	21		206		9	90
Female	18	163	53	19.9481	3363	8.8	162	18	233		44		81.4
Male	18	178	75	23.6713	4971	6.8	222	20		226		3	79
Female	18	162	49	18.6709	3052	7.8	180	7	213		51		83.3
Female	18	161	65	25.0762	2718	8.9	140	20	258		45		69.9
Female	18	163	50	18.8189	3624	8.6	167	17	199		42		86.4
Female	18	155	42.5	17.6899	1999	10	130	7	269		33		60.9
Female	18	161	49	18.9036	2839	9.6	177	16	240		37		76
Female	18	162	51	19.433	3793	9.2	147	23	233		40		80.6
Female	18	163	54	20.3244	3246	8.4	185	20	216		40		83.8
Female	19	168	47	16.6525	3415	8.3	145	15	222		35		77
Male	18	170	61.5	21.2803	4639	7	230	10		232		3	73.8
Female	19	156	44	18.0802	3078	8.7	175	22	211		49		83.8
Female	19	161	50	19.2894	2396	9.4	152	17.5	244		33		73.1
Female	18	160	52	20.3125	3335	9	160	11	240		56		80.5
Female	19	173	57	19.0451	4749	8.3	205	8	199		59		91.7
Female	19	162	50	19.052	3044	8.3	195	10	207		49		85.1
Male	18	179	62	19.3502	3717	7.4	190	9		247		5	64.3
Male	18	172	63	21.2953	3797	7.1	210	7		245		7	70.9
Female	19	173	54	18.0427	3403	9	190	15.5	234		60		87.5
Male	19	171	65	22.2291	4365	6.9	250	21		182		20	91.5
Male	19	180	76	23.4568	5696	7.2	235	19		208		5	78.8
Female	19	156	46	18.902	2912	8.6	185	14	199		50		84.6
Male	18	165	50	18.3655	3275	8.2	195	18		244		11	69.3
Female	18	172	60	20.2812	4321	7.7	207	19	187		56		98
Male	19	173	83	27.7323	4371	7.4	200	7.5		245		0	63.6
Male	19	173	60	20.0474	3747	6.8	240	24		238		11	82.4
Male	18	171	57	19.4932	3424	7.1	225	26		231		18	82.1
Female	18	176	60	19.3698	3571	8.2	200	11	195		56		91.6
Male	19	172	62	20.9573	5458	7.3	210	20		214		14	84.7
Male	19	163	47	17.6898	4071	7.6	202	20.5		218		15	74.7
Male	18	175	80	26.1224	5030	8.4	200	7		254		0	63.1
Female	19	159	50	19.7777	3298	9.3	160	22	211		46		81.8
Female	18	162	53	20.1951	3411	8.3	200	18.5	205		56		90.8
Female	19	156	54	22.1893	3665	8	185	23	208		35		88.8
Male	18	170	56	19.3772	4365	7	225	17.5		258		6	73.4
Male	19	180	70	21.6049	5127	6.7	260	6		203		8	86.7
Male	19	185	76	22.206	5437	6.7	275	-2		199		5	80
Female	18	164	51	18.9619	2685	8.8	168	16.5	242		52		78.6
Female	18	171	55	18.8092	3998	8.9	198	11.5	183		35		85.4
Female	18	172	79	26.7036	4517	8.9	190	22	214		38		83
Female	18	160	46.5	18.1641	3249	8.2	180	20	201		62		91.5
Female	18	160	57	22.2656	3341	9.5	175	18	247		46		79.5
Female	18	162	53	20.1951	3656	9.5	180	24	228		42		84.1
Female	19	168	46	16.2982	2157	9.3	165	30	239		33		73.5
Female	18	157	50.5	20.4876	3808	8.7	175	27	238		46		85.6
Female	18	170	62	21.4533	3651	8.6	185	16	282		45		78.4
Female	19	165	50	18.3655	3361	8.3	175	23	235		46		84.6
Female	18	165	59	21.6713	3713	8.9	165	7	209		64		90.6
Female	18	168	59	20.9042	4760	8.9	175	23	224		39		84.6
Female	18	166	66	23.9512	3292	9.6	150	9	226		41		72.3
Male	18	172	58	19.6052	3201	6.9	255	16		208		20	85.6
Male	18	176	79	25.5036	4280	7.3	245	6		242		0	66.1
Female	19	167	50	17.9282	3159	8.9	170	17	232		28		78.8
Male	18	170	53	18.3391	3859	6.7	275	16		224		9	84
Female	18	166	64	23.2254	2575	9.5	160	22	235		44		76.8
Female	18	167	60	21.5139	3520	9.7	150	26	247		40		79.6
Female	18	158	56.5	22.6326	2820	9.5	160	14	242		36		75.2
Female	18	154	45	18.9745	3026	8.9	185	18	227		16		74.2
Female	19	168	67.5	23.9158	3730	9.2	185	14	281		39		76.4
Female	19	162	49	18.6709	3358	9.5	160	16	276		36		73.8
Female	18	170	74.5	25.7785	3972	9.1	160	18	224		43		79.4
Female	18	161	49	18.9036	3068	8.7	185	10	216		60		85.8
Female	18	161	48	18.5178	2475	7.6	220	22	199		50		90.2
Female	19	164	61	22.68	3000	9.2	165	10	229		41		77.4
Female	19	152	52	22.5069	2833	8	190	22	208		42		86
Female	18	168	49	17.3611	2695	8.8	180	11	218		37		78
Female	18	161	50	19.2894	2986	8.4	195	19	224		40		82.7
Female	18	160	55	21.4844	3703	8.9	175	21	225		37		83.5
Male	18	172	82	27.7177	5112	7.6	235	5		286		0	65
Female	19	157	46	18.662	3453	8	195	20	227		39		86.8
Female	18	159	60	23.7332	3006	9.2	140	5	225		41		71
Female	18	158	52	20.83	3200	8.7	185	20	227		31		80.9
Female	17	171	60	20.5191	3245	8.6	180	21	218		52		84.3
Male	18	170	63	21.7993	3972	7.2	200	19		254		6	68.9
Male	18	170	52	17.9931	4273	7.4	215	12		243		5	70.1
Female	18	162	62	23.6244	3285	8.8	180	12	215		40		81.5
Female	18	167	49	17.5697	3028	7.9	225	13	209		34		85.8
Female	18	163	56	21.0772	3123	9.2	165	13	229		46		78.4
Male	19	178	66	20.8307	4493	7.2	245	9		226		0	72.6
Male	18	166	56	20.3223	3995	7.2	255	27		236		7	77.5
Female	18	156	63	25.8876	3896	8.2	190	27	225		38		84.3
Male	19	176	70	22.5981	4627	7.6	225	7		246		10	75.8
Male	19	168	62	21.9671	4002	7.6	200	13		268		5	65.1
Female	18	165	58	21.3039	3423	8.5	180	16	225		47		84.4
Female	18	160	50	19.5312	3768	9.3	145	21	232		36		78.7
Female	18	162	54	20.5761	3289	8.8	160	28	239		47		81.9
Male	18	185	67	19.5763	5923	7.3	245	1		247		2	70.4
Female	18	174	68	22.46	3493	8.2	200	16	211		43		87
Male	18	180	64	19.7531	5879	7.3	235	14		213		0	77.2
Female	18	163	50	18.8189	2737	8.5	185	25	214		58		87.2
Male	19	164	50	18.5901	3870	7	235	15		221		12	80.4
Female	18	163	52	19.5717	3357	8.7	180	12	234		44		82
Male	18	172	82	27.7177	4708	7.7	220	7		262		7	68.3
Female	17	153	44	18.7962	2520	8.8	160	11	194		38		80.7
Female	18	159	62	24.5243	2684	9.1	170	13	240		28		72
Female	18	165	55	20.202	3627	9.3	160	15	184		44		81.6
Male	18	175	65	21.2245	4120	6.7	265	15		240		7	80.4
Female	20	156	45	18.4911	3478	9.8	160	24	242		35		80.1
Female	20	161	55	21.2183	4208	9.3	190	26	240		28		83.1
Male	19	178	87	27.4587	5788	7.7	235	6		313		0	61.2
Male	18	170	77	26.6436	5083	7.9	180	0		271		2	55.4
Male	19	173	52	17.3745	4840	7.5	225	9		243		7	71.1
Female	19	160	58	22.6562	3233	8.4	180	16	217		43		83.2
Female	18	164	50	18.5901	2883	9.3	170	22	203		52		84.1
Female	19	168	55	19.487	3896	9.7	180	0	247		47		73
Female	19	163	63.5	23.9	3784	8.4	190	23	227		51		87.2
Male	19	180	67	20.679	4342	7	225	-1		247		7	68.8
Female	19	172	60	20.2812	4120	8.6	195	27	184		45		88
Male	18	171	69	23.597	4174	7.3	220	7		241		2	68.6
Male	19	178	68	21.4619	5209	6.8	245	11		181		12	91.6
Male	19	177	62	19.79	4098	6.9	235	22		219		1	76.6
Male	19	175	82.5	26.9388	4772	7.5	215	13		239		0	67.8
Female	18	152	49	21.2084	2655	8.9	150	12	208		50		78.9
Female	18	157	53	21.5019	4131	8.2	185	20	225		54		87.1
Male	18	174	79	26.0933	5107	7.9	210	7		268		0	65.8
Female	18	163	49	18.4425	3274	8.1	195	12	206		52		86.5
Male	18	173	68	22.7204	4496	7.3	225	7		238		0	70.2
Male	18	174	70.5	23.2858	5758	7.5	240	17		237		1	75.4
Female	18	160	55	21.4844	3751	8.7	195	23	216		40		87.6
Female	19	165	57	20.9366	3458	8.1	200	14	212		39		86.4
Male	18	168	70	24.8016	4217	7.5	200	13		241		0	63.7
Female	19	160	55.5	21.6797	3723	8.4	200	27	213		27		87.6
Female	18	165	52.5	19.2837	3460	9.7	185	16	246		28		78.8
Male	18	177	66	21.0667	4660	6.8	255	13		224		4	77.5
Female	18	156	63	25.8876	2697	9.1	180	20	242		32		74
Male	18	172	72	24.3375	4817	7.6	210	8		233		0	67.7
Female	18	160	55	21.4844	2549	8.8	180	11	218		45		78.5
Male	19	170	59	20.4152	4769	7.4	210	11		209		2	73
Male	18	173	63	21.0498	5042	7.4	235	11		245		4	73.4
Female	19	153	38	16.2331	2771	8.8	165	18	254		45		73.9
Female	19	158	49	19.6283	3002	8.9	170	8	233		42		78
Female	18	155	38	15.8169	2632	8.4	195	13	183		41		79.8
Female	19	163	47	17.6898	3508	8.7	175	20	216		41		85.2
Male	18	184	73	21.5619	5607	6.7	250	14		211		8	86.4
Female	18	165	48	17.6309	2389	8.3	200	23	206		42		84.5
Female	19	162	46	17.5278	3238	8.9	155	18	218		52		81.5
Female	18	156	41	16.8475	2271	9.4	160	17	273		27		67.4
Male	18	174	58	19.1571	4681	7	230	12		253		15	80
Female	18	158	39	15.6225	2371	9.4	160	10	248		33		69.3
Female	19	156	42	17.2584	2303	10.7	140	16	267		28		61.9
Male	19	174	61	20.148	5144	6.6	260	8		216		8	85.1
Female	18	168	62	21.9671	3270	9	160	12	239		27		76.3
Female	19	165	45	16.5289	2864	8.5	205	19	223		46		80.5
Female	19	166	56	20.3223	3017	8.7	195	12	223		53		83
Female	18	150	45	20	2537	9.7	165	6	245		30		71.9
Female	18	171	48	16.4153	2343	9.4	165	16	241		0		64.1
Female	18	175	52	16.9796	3306	8.8	180	10	247		44		76.5
Female	18	162	62	23.6244	3330	8.8	170	18	229		30		80.3
Female	18	172	52	17.5771	2594	8.2	190	12	361		45		64.6
Female	18	170	60	20.7612	3133	8.7	195	15	224		31		80.8
Female	18	158	70	28.0404	2756	9.7	140	13	361		30		49.7
Male	19	168	53	18.7783	4424	7.5	250	20		248		10	78.3
Female	18	153	50	21.3593	3096	9	180	18	237		51		80.3
Female	18	161	62	23.9188	2883	9.3	155	16	231		52		78.2
Female	18	170	57	19.7232	3852	8.5	175	15	225		37		83
Female	18	164	51	18.9619	3271	8.5	185	19	198		57		89.3
Female	18	155	54	22.4766	2210	9.4	165	17	241		37		73.2
Female	19	158	58	23.2335	2733	9	180	7	247		30		74.7
Female	18	160	55	21.4844	2998	10.7	160	14	225		38		71.3
Female	19	168	51	18.0697	4123	8.8	185	29	221		57		88.8
Male	18	173	74	24.7252	5215	5.9	185	15		252		3	69.2
Male	18	181	70	21.3669	4183	7.4	200	3		238		2	65.3
Female	19	164	47	17.4747	3085	8.2	200	16	209		44		85.2
Male	18	179	66	20.5986	4586	7.2	210	12		237		5	72.2
Female	19	163	49	18.4425	3062	9.1	175	14	228		48		79.8
Male	18	182	56	16.9062	5016	7.4	225	33		225		12	80.6
Male	20	173	62	20.7157	4097	7.6	230	8		251		2	68.4
Male	18	181	63	19.2302	5239	7	275	6		233		2	78
Male	18	176	62	20.0155	5085	6.8	265	13		235		4	80
Female	19	166	52	18.8707	3170	8.2	165	24	211		41		84.5
Male	18	177	56	17.8748	3986	7.8	220	12		211		6	73.1
Female	18	166	48	17.4191	3150	8.8	190	14	213		46		83.3
Female	19	159	53	20.9644	3929	9	165	24	218		40		84.1
Male	18	180	84	25.9259	4600	7.6	245	1		252		1	63.9
Male	18	173	58	19.3792	3782	6.9	245	19		222		9	80.3
Male	18	180	71	21.9136	5439	7.2	215	23		184		1	76.8
Female	18	170	52	17.9931	2764	8.8	190	22	238		42		80.3
Female	18	165	48	17.6309	2867	8.4	155	8	224		31		76.8
Male	19	176	68	21.9525	4511	7.1	240	16		235		17	82
Male	18	176	57	18.4013	4621	7.6	235	18		262		3	70.5
Male	18	174	57	18.8268	4209	6.4	265	14		198		12	88.9
Female	18	166	52	18.8707	3351	8.3	185	13	215		47		85.3
Female	19	155	49	20.3954	3137	9.5	135	21	299		12		57.1
Female	18	149	44	19.8189	2412	9	150	12	224		40		74.8
Male	18	182	95	28.6801	6331	7.5	240	18		269		1	66.8
Female	19	164	88	32.7186	3478	9.8	165	7	245		47		71.6
Female	18	166	63	22.8625	4418	8.9	185	15	201		43		86.6
Female	19	168	57	20.1956	3816	7.7	185	21	182		42		91.1
Female	19	163	50	18.8189	3400	8.6	180	27	226		40		86
Male	18	176	72	23.2438	5562	6.5	275	12		206		6	87
Male	18	177	65	20.7476	5626	7.4	215	16.5		213		2	76.2
Female	19	163	55	20.7008	3888	9.3	180	17.5	241		47		81
Male	18	185	67	19.5763	6576	6.9	255	7		252		11	82.4
Male	19	176	58	18.7242	5010	7.2	240	12		226		2	75
Male	18	175	78	25.4694	4801	7.3	245	7		240		2	69.7
Female	19	163	50	18.8189	3676	7.7	185	23	198		60		97
Male	19	169	63	22.0581	7689	7.8	210	15.5		247		3	72
Female	18	160	50	19.5312	3204	9.3	165	8	225		40		77.8
Female	18	160	55	21.4844	4042	8.5	180	24.5	224		42		86.5
Female	18	163	51	19.1953	3659	8.3	195	17	206		48		88.6
Male	19	183	68	20.3052	5813	7.3	225	8		216		6	77
Male	18	183	76	22.694	5730	6.8	220	7		226		4	77.6
Female	19	169	60	21.0077	3874	8.3	160	20	233		40		83.2
Male	18	173	62	20.7157	5266	7	240	10		217		10	83.4
Female	18	157	50	20.2848	3519	8.6	170	17	211		50		85.5
Male	18	181	55	16.7883	5528	7.5	235	6		233		10	76.4
Male	18	186	76	21.9679	5154	8	195	6		266		0	65.6
Male	19	175	65	21.2245	4875	7.3	245	21.5		211		1	77.9
Male	19	172	54	18.2531	4304	7.4	225	9		231		5	71.8
Male	18	171	60	20.5191	4995	7.3	250	23		217		5	78.8
Female	18	165	58	21.3039	4192	7.7	200	19.5	192		68		105
Female	19	169	55	19.257	2891	9.9	150	12	235		46		73.8
Male	18	176	71	22.921	5013	7.8	210	12		274		1	66.7
Female	19	165	50	18.3655	3496	9.1	160	10	237		50		80.9
Male	19	176	57	18.4013	5363	7	260	10		248		8	79.9
Female	18	163	68	25.5937	3554	7.7	200	5	196		53		87
Male	19	172	54	18.2531	4009	9	180	-4		308		12	52.9
Female	18	160	48	18.75	3454	8.6	185	14	206		46		86.4
Female	18	174	65	21.4692	3878	9.2	155	7.5	259		46		77.6
Male	18	180	63	19.4444	4850	7.4	245	10		240		10	78.7
Male	18	177	62	19.79	4267	7.5	210	-4		258		1	60.7
Male	18	173	73	24.3911	4614	7.7	200	16		247		1	65.2
Female	19	168	50	17.7154	4162	8.9	180	24	213		50		87.6
Female	19	156	57	23.4221	3139	9.5	150	17	215		51		78.7
Male	18	171	56	19.1512	4718	7.3	255	13		255		2	71.8
Female	18	160	48	18.75	3543	9.2	155	16	226		51		81.7
Female	18	161	48	18.5178	3893	7.9	210	20	184		57		97
Female	19	165	65	23.8751	3138	9.4	155	19	237		34		76.4
Male	17	170	61	21.1073	2860	8.2	185	-3		276		1	45.6
Female	17	173	78	26.0617	4112	9.7	165	11	218		40		77
Female	18	161	52	20.061	3357	9.7	170	22	212		30		81.5
Male	18	181	78	23.8088	5050	7.1	240	25		215		19	89.6
Female	18	152	44	19.0443	2363	9	170	15	234		38		76.1
Female	19	153	56	23.9224	3231	9	165	12	247		33		76.3
Female	19	165	53	19.4674	3792	9.2	190	21	247		39		82.2
Female	20	162	68	25.9107	3343	9.2	165	25	261		37		75.6
Male	18	180	85	26.2346	6643	8.5	200	16		327		0	57.8
Female	18	159	55	21.7555	3173	9	170	14	238		40		78.8
Male	19	168	80	28.3447	4000	7.6	210	4		284		2	56.9
Female	19	160	40	15.625	2202	8.9	170	20	221		52		76.6
Female	18	162	46	17.5278	2604	8.6	185	13	221		60		84
Male	19	180	66	20.3704	5026	7.7	230	17		225		6	76.4
Male	18	178	73	23.04	5159	8	185	5		272		0	63
Female	18	173	63	21.0498	3585	8.3	180	21	267		40		82.1
Male	19	172	55	18.5911	3817	8	210	-20		184		1	61.5
Male	18	180	70	21.6049	3900	7.3	230	-5		249		13	69.2
Male	18	172	59	19.9432	4408	7.2	235	23		265		1	71.2
Male	18	183	65	19.4094	4699	7.5	225	20		214		5	76.3
Female	19	150	50	22.2222	2785	9.4	165	20	236		49		77.8
Male	19	175	66	21.551	5177	7.4	230	20		275		5	71.7
Male	19	180	63	19.4444	5352	6.9	235	5		203		6	81.2
Female	18	158	48	19.2277	3203	8.3	180	10	267		33		77.2
Female	19	160	51	19.9219	3614	9.2	175	15	214		46		83.8
Female	19	153	58	24.7768	2827	8.7	170	12	205		50		79.1
Male	18	180	62	19.1358	4167	7	230	17		225		12	80.6
Female	20	160	53	20.7031	2781	8.6	180	15	202		42		82.9
Female	18	168	53	18.7783	2691	9.2	170	22	211		50		81
Male	17	178	86	27.143	5184	8.2	210	19		279		0	64.6
Female	17	162	59	22.4813	3580	9.4	160	17	227		32		80
Male	18	175	50	16.3265	4860	7.3	240	8		236		12	76.9
Female	19	166	54	19.5965	3175	8.8	180	10	233		48		80.2
Male	20	172	80	27.0416	4937	8.8	190	12		285		1	57.6
Female	18	161	48	18.5178	2370	8.4	175	11	267		24		72.1
Male	18	179	70	21.847	5223	6.4	275	8		221		20	93.6
Male	19	180	60	18.5185	5510	7.2	235	5		246		5	73.8
Female	18	158	47	18.8271	2420	9.5	155	16	233		48		75.6
Female	18	156	49	20.1348	2585	9.9	140	23	275		33		66.9
Female	20	160	55	21.4844	2380	9.5	140	13.5	246		35		69.3
Female	19	156	51	20.9566	2365	9.1	160	14.5	185		37		75.3
Male	19	178	72	22.7244	3401	7.4	240	14		225		0	70.4
Male	19	177	86	27.4506	4970	7.7	235	25		362		1	58.3
Female	19	180	52	16.0494	2569	9.2	195	12	232		32		74.1
Female	18	168	53	18.7783	2528	8.5	170	9	253		41		75.7
Male	18	166	76	27.5802	2762	7.9	210	18		295		0	52.9
Male	18	175	58	18.9388	5108	7	255	14		223		14	85.6
Male	19	177	78	24.8971	5139	7.8	225	17		263		0	68.4
Female	17	163	45.5	17.1252	3388	9.2	175	17	185		42		78.3
Female	17	156	78	32.0513	2504	10	125	14	243		39		58.3
Female	20	160	48	18.75	2081	8.7	175	18	224		36		77.6
Male	18	175	84	27.4286	4238	7.4	200	2		362		0	46.9
Male	18	170	77	26.6436	6059	6.7	260	6.5		234		13	83.9
Male	18	173	101	33.7465	5464	8.3	200	7		294		0	56
Male	18	165	55	20.202	3636	7.2	235	11		259		6	69.8
Male	19	173	77	25.7276	4166	7.6	200	1		242		5	59
Female	21	156	52	21.3675	3369	9.9	160	18	234		26		77.6
Female	18	162	42	16.0037	2086	8.4	205	24	228		43		78.8
Female	19	167	63	22.5896	2222	9.4	160	20	263		25		70.6
Female	19	164	57	21.1927	3161	8.4	175	26	213		44		85.8
Female	18	166	51	18.5078	3756	9.4	140	16	265		50		74.9
Male	18	168	52	18.424	4231	7.2	220	9		272		15	75.5
Female	18	160	55	21.4844	3610	8.7	170	20	225		49		84.5
Female	18	164	50	18.5901	3834	9.9	170	23	244		44		76.8
Male	19	170	65	22.4913	5103	7.3	270	15		244		14	84.3
Female	19	158	51	20.4294	3189	8.8	180	13	224		55		82.8
Female	18	160	50	19.5312	3262	8.2	200	22.5	237		50		85
Male	18	176	66	21.3068	5172	7.6	225	15		254		1	72.4
Female	18	162	48	18.2899	3830	8.2	165	10	217		50		84.9
Male	19	180	69	21.2963	4883	6.8	260	17		234		21	90.6
Male	18	165	65	23.8751	4939	8	195	10		285		9	68
Female	18	170	50	17.301	2039	10.1	100	10	307		28		53.2
Female	18	164	47	17.4747	3136	8.6	160	12.5	233		36		78
Female	18	167	52	18.6453	3712	9.1	165	8	245		30		77.8
Male	19	179	62	19.3502	4024	6.4	260	3.5		231		14	82.4
Female	18	169	51	17.8565	3409	9.3	170	3	240		25		72.6
Female	18	163	50	18.8189	3443	9.5	165	22	240		32		79.9
Female	18	153	48	20.5049	2343	9.3	145	20	221		21		69.9
Female	19	162	46	17.5278	4048	8.7	170	23	183		51		87.9
Female	18	160	52	20.3125	3176	8.6	175	10	213		40		81.5
Male	18	183	82.5	24.635	6079	7.4	230	19		255		0	70.4
Female	19	158	47	18.8271	3601	9.7	155	19	223		45		81.2
Female	18	165	49	17.9982	3471	9.5	165	2	242		38		73
Male	19	165	60	22.0386	4522	7.3	230	20		212		12	81.9
Female	19	164	49	18.2183	3576	9.3	185	23	227		44		84.4
Female	18	169	51	17.8565	3495	8.7	180	18	240		45		83
Male	18	187	77.5	22.1625	6283	7.8	225	2		251		5	69.8
Male	19	176	66	21.3068	4890	7.8	200	9		482		0	53.5
Female	19	156	46	18.902	2963	8.8	200	18	238		40		80.5
Female	18	167	51	18.2868	3716	8.8	200	17	217		35		85.2
Male	18	171	60	20.5191	5943	7.7	210	18		236		2	73.6
Female	19	162	53	20.1951	4127	9.6	145	16	226		21		73.2
Male	19	170	60	20.7612	5347	7.1	230	11		233		3	74.8
Male	19	176	69	22.2753	5200	7.2	215	22		215		3	76.8
Female	18	165	51	18.7328	3519	8	195	26	203		49		93.5
Male	19	172	50	16.901	3400	6.8	260	9		276		16	74.2
Female	19	167	52	18.6453	3871	8.8	170	26	231		48		85.2
Male	19	185	70	20.4529	6042	6.9	265	8.5		203		2	81.6
Female	18	159	46	18.1955	3650	9.3	190	13	240		34		80.7
Male	19	181	54	16.483	5714	7.4	225	14		299		2	64.4
Male	19	170	75	25.9516	5127	7.2	240	13		266		5	70.8
Female	18	165	49	17.9982	3456	9	190	26	229		49		87
Female	18	162	76	28.959	3558	8.3	195	14	229		42		79.4
Female	19	157	42	17.0392	3517	8.4	180	15	224		58		84.6
Male	18	177	80	25.5354	3631	8.3	170	-11		294		0	43.8
Male	18	180	71	21.9136	5524	6.9	225	21		237		1	78.1
Female	18	157	55	22.3133	3301	9.6	165	17	237		30		77.3
Female	19	159	46	18.1955	3563	8.4	190	18	201		56		90.9
Male	20	161	42	16.2031	2738	7	225	10		219		15	71.1
Female	19	168	53	18.7783	3146	8.9	195	26	185		44		83.8
Male	19	172	55	18.5911	5199	7.5	240	23		245		16	84.3
Female	18	170	58	20.0692	3995	8.2	190	20	229		43		85.7
Female	18	161	53	20.4467	3392	8.4	180	20	215		32		84.3
Female	19	168	50	17.7154	3447	8.7	180	9.5	201		42		86
Female	17	172	60	20.2812	4267	8	215	17	182		29		89.8
Female	17	162	78	29.7211	3727	9.3	170	26	253		20		71.8
Male	18	180	66	20.3704	4811	6.6	235	22		184		1	80.7
Female	19	155	42	17.4818	3364	8	200	29	216		44		90
Male	18	171	71	24.281	5066	7.1	230	20		219		2	74.5
Male	18	173	61	20.3816	3672	7.9	195	7.5		291		1	59
Female	18	161	52	20.061	3546	8.7	175	20	236		24		80.6
Female	19	152	52	22.5069	3251	9.7	155	22	249		22		73.7
Female	18	161	50	19.2894	3813	8.3	200	21	233		32		85.3
Male	19	180	65	20.0617	4461	7.4	220	19		243		1	68.8
Female	19	163	48	18.0662	3532	8.3	180	24	213		46		88.3
Male	18	183	58	17.3191	5309	7.4	225	9		245		3	69.6
Male	19	173	66	22.0522	4667	7.1	220	10		255		5	71.3
Female	18	165	58	21.3039	3793	8.8	175	17	261		39		80
Female	19	158	43	17.2248	3066	8.1	195	24	223		42		85.1
Male	18	175	60	19.5918	6314	7.3	200	13		222		3	72.8
Male	18	180	75	23.1481	4421	7.5	215	6		252		1	68.2
Male	19	170	57	19.7232	4867	7.5	205	20		289		0	67.2
Male	18	174	70	23.1206	4400	7.5	200	9.5		240		17	76.4
Male	18	170	85	29.4118	4500	7.4	220	16		288		5	61.4
Male	18	173	50	16.7062	4050	7.2	260	11		221		21	82.2
Male	18	178	58	18.3058	4076	7.2	220	8		209		3	72.2
Female	18	167	63	22.5896	3536	10.2	140	12	254		49		73.9
Male	18	170	60	20.7612	4031	7.5	225	10		259		1	67.7
Female	18	167	48	17.2111	3400	8.7	185	12	243		38		81.6
Male	18	175	85	27.7551	5557	7.5	225	7		243		5	68.4
Female	19	165	56	20.5693	3733	9.1	151	28	202		30		85.8
Female	19	168	63	22.3214	4141	9.4	185	15	248		32		79.4
Female	18	162	41	15.6226	3713	8.9	165	13	226		41		78.6
Male	18	175	65	21.2245	4100	7.1	240	5.5		219		1	72.2
Male	17	174	70	23.1206	4461	7.5	230	16		225		5	73.4
Female	18	161	46	17.7462	3100	10.2	160	24	228		33		77.3
Female	20	165	66	24.2424	3224	8.7	190	6	227		38		77.3
Male	18	182	65	19.6232	5662	6.9	245	17		257		6	78.8
Female	17	168	46	16.2982	3521	9.5	185	13	253		34		76
Female	18	165	55	20.202	3573	8.3	180	11	204		36		86.4
Female	18	162	75	28.578	4114	8.3	180	16	224		53		80.2
Female	18	168	50	17.7154	3100	9.2	175	12	288		36		70.4
Male	18	173	50	16.7062	4231	7.1	230	11		211		8	74.7
Male	19	174	80	26.4236	4587	7.3	235	14		278		2	65
Female	19	172	58	19.6052	4047	8.9	175	20	238		42		82.8
Male	19	178	50	15.7808	4259	7.4	230	8.5		238		8	70.9
Female	18	158	50	20.0288	2785	8.6	150	5.5	264		30		70.5
Female	18	164	61	22.68	3714	8.2	175	23	241		39		84.2
Female	18	170	50	17.301	3830	7.9	197	7	206		58		91
Female	19	165	57	20.9366	3257	8.7	192	12.2	236		51		81.5
Female	18	168	54	19.1327	3048	8.6	190	24	237		48		83
Female	18	173	60	20.0474	4415	8.5	190	12.5	215		43		85.7
Female	18	158	50	20.0288	3369	9.4	151	22.4	234		38		80.3
Female	18	160	47.5	18.5547	3262	9.3	148	16.5	259		41		75
Female	18	163	62	23.3355	3976	9.5	135	21	246		26		74.1
Female	18	166	51	18.5078	3132	8.2	165	14.3	222		37		80
Female	18	167	51	18.2868	2526	9.4	160	13.3	240		36		74.1
Female	19	164	48	17.8465	2170	8.5	195	24.1	214		42		83
Female	18	164	56	20.8209	3656	9.1	165	23.5	221		28		82.4
Male	19	174	83	27.4145	5154	7.8	220	27.3		243		0	72
Female	18	163	46	17.3134	2942	9.4	180	24.5	246		40		79
Male	19	174	62	20.4783	4126	7.1	252	-1		252		8	69
Female	18	163	54	20.3244	3097	9	180	18.4	211		32		80.6
Female	19	164	55	20.4491	3131	10	150	15.1	252		27		71.4
Female	18	157	70	28.3987	3636	9.3	153	15.6	268		43		71.4
Female	18	160	53	20.7031	3245	8.8	180	18	225		47		81.7
Female	17	166	52	18.8707	3738	8.7	175	23	405		0		61.8
Female	18	158	48	19.2277	3110	8.5	203	29	241		32		83.1
Female	18	163	55	20.7008	4021	8.7	198	21.5	266		59		86.1
Female	20	166	68	24.677	3631	8.2	198	20.1	235		41		82.2
Female	19	153	44	18.7962	2122	8.5	175	15.5	184		38		78.1
Female	20	167	91	32.6294	4623	9.6	182	16.5	286		32		67.4
Female	19	157	46	18.662	3395	9.2	183	21	184		53		84.8
Female	18	157	43	17.4449	2618	8.8	175	24	203		52		85.7
Female	19	155	55	22.8928	3070	8.6	160	17	185		45		79.4
Female	19	158	65	26.0375	3281	9	180	31.2	229		34		79.3
Male	18	171	60	20.5191	4373	7.3	230	15.3		231		13	79.6
Female	18	162	55	20.9572	3347	10.9	155	9.2	304		33		59.7
Female	19	168	50	17.7154	3500	7.5	215	24	183		50		96
Female	19	172	65	21.9713	3958	8.7	175	27.3	240		34		84
Female	18	149	41	18.4676	2764	9.5	145	18.5	232		48		74.7
Female	18	161	57	21.9899	3620	9	180	12	289		53		76
Female	18	158	48	19.2277	2987	8.2	170	10.5	209		43		82.1
Female	18	160	46	17.9688	3210	9	185	16	237		36		79.3
Female	18	155	51	21.2279	2708	9.2	170	17.3	231		45		77.9
Female	18	156	53	21.7784	3651	9.2	178	23.4	228		50		84.9
Female	18	165	53	19.4674	3900	8.3	175	16.4	243		40		83
Female	18	161	55	21.2183	3553	8.6	175	16.5	228		49		84.5
Female	18	158	50	20.0288	2754	9.2	163	23	232		44		78.9
Female	19	176	57	18.4013	3083	9.8	155	6	234		44		75
Male	19	168	55	19.487	4394	7.8	242	10.7		285		9	71
Female	19	161	47	18.132	3826	9.1	180	25	228		50		85.8
Female	18	151	54	23.6832	2866	9.8	140	14.2	254		42		70.6
Female	19	160	54	21.0938	1882	9.5	180	9	225		40		70.3
Female	18	162	49	18.6709	2791	9.4	150	17	223		46		76.3
Male	19	167	61	21.8724	4087	8.1	190	12.3		283		3	59.6
Female	18	163	46	17.3134	3813	8.9	170	21.7	234		54		85.2
Female	19	156	57	23.4221	3687	8.8	185	15.3	217		30		83.6
Male	19	167	66	23.6652	4792	8.1	225	16		301		1	64.2
Female	19	162	50	19.052	3209	8.7	180	23.2	218		59		86.8
Female	18	160	60	23.4375	3672	9.4	151	20.3	229		32		79.8
Female	19	160	70	27.3438	3658	9.2	175	18.5	227		50		80.5
Female	19	164	62	23.0518	4222	9.4	182	21.6	224		48		84.1
Female	18	149	52	23.4224	2650	9.4	165	16	234		35		75.6
Female	18	155	57	23.7253	2500	9.7	151	18.5	244		37		73.9
Female	19	158	50	20.0288	2376	9.4	161	22.7	232		36		76.3
Female	19	160	55	21.4844	3500	7.8	182	27.3	213		55		91.5
Female	18	159	56	22.151	3791	8.4	180	26	212		46		88.4
Female	18	152	41	17.7458	2825	8.2	185	16	212		56		84.8
Female	18	160	51	19.9219	3148	9.9	170	20.2	240		50		77.9
Female	18	156	58	23.833	3637	8.3	190	13.5	205		46		87.5
Female	19	169	64	22.4082	4007	8.4	178	13	231		30		82
Female	18	151	50	21.9289	3356	9.1	155	17.2	361		26		63.5
Female	18	161	55	21.2183	3653	9.1	158	20.7	234		48		82.5
Male	18	163	60	22.5827	4021	7.2	235	16.2		243		5	71.5
Female	18	157	52	21.0962	3419	9.1	170	24.5	241		36		82.5
Female	18	162	57	21.7193	2898	9.3	178	23	246		53		80.2
Male	18	173	55	18.3768	5301	7.5	200	4		253		4	68.4
Female	20	167	44	15.7768	2563	8.7	170	0	221		48		68.9
Female	19	154	70	29.5159	2993	9.4	125	9.5	218		46		64.7
Female	18	164	53	19.7055	3417	8.4	180	23.2	218		42		86
Female	18	166	55	19.9594	3736	8.8	163	24	241		36		82.5
Female	18	160	60	23.4375	4142	9.1	165	27.3	261		37		81
Female	20	158	68	27.2392	3314	8.7	170	24.7	216		53		83.4
Female	19	164	68	25.2826	2865	9.1	178	24	253		35		75.5
Male	18	172	60	20.2812	4993	6.4	250	17		212		7	85
Female	18	165	57	20.9366	3758	8.7	180	14.5	229		40		83.2
Female	18	162	56	21.3382	3710	8.7	183	25.5	185		50		86.4
Female	18	159	55	21.7555	3795	7.9	190	14.2	232		50		86.4
Female	19	162	49	18.6709	1818	9.4	150	17.7	231		50		66.6
Female	19	156	56	23.0112	3426	8.6	162	30	228		62		90.4
Female	19	158	48	19.2277	3305	8.3	170	19	205		55		87.2
Female	18	160	60	23.4375	4362	8.6	188	16.4	242		38		82.9
Female	19	163	58	21.83	2981	8.2	170	24.6	240		56		83.8
Male	18	172	59	19.9432	5207	7.6	220	17.5		247		0	73.2
Female	18	153	48	20.5049	3387	9.4	158	17	234		45		79.9
Female	17	168	70	24.8016	2945	9.3	155	13.1	223		28		73.1
Female	18	168	70	24.8016	4317	9.1	180	11.3	223		50		80.5
Male	20	168	100	35.4308	4029	8.6	205	3.3		334		1	46.9
Male	19	172	80	27.0416	4608	8	225	13.3		274		0	62.8
Female	19	156	40	16.4366	2936	9.4	155	20.4	225		47		75.1
Male	18	176	67	21.6296	4649	7	230	4.8		241		5	73.2
Female	18	165	58	21.3039	3691	8.1	200	20.1	199		50		90.5
Male	19	186	76	21.9679	4672	7.4	227	8		184		3	72.3
Male	18	169	70	24.5089	4788	8.5	215	5		240		9	69.6
Female	18	168	58	20.5499	3283	8.4	160	15.2	206		58		86.3
Female	19	160	57	22.2656	3269	8.9	168	23	217		39		82.8
Female	18	169	56	19.6072	4277	9.5	190	9.1	224		47		82.5
Male	20	163	54	20.3244	4903	7.1	226	16.1		213		12	82.7
Female	18	165	51	18.7328	3505	8.7	173	21.8	222		40		84.5
Female	19	158	49	19.6283	3224	10.1	145	7	244		56		74.5
Female	19	161	58	22.3757	3245	8.9	171	19.8	203		30		83.1
Male	18	182	68	20.5289	4809	7.6	216	-10		245		4	63.7
Female	18	160	47	18.3594	3161	8.9	170	21.2	227		56		83.8
Male	18	170	63	21.7993	5257	7.6	220	10		238		5	73.6
Male	18	174	50	16.5147	3032	6.9	245	2		204		0	67.3
Female	18	165	50	18.3655	3075	8.7	150	3.3	256		63		76.4
Female	19	156	46	18.902	3589	9.9	163	12.2	184		56		82.4
Female	18	162	59	22.4813	3894	9.6	135	3.8	225		49		72.3
Female	18	165	54	19.8347	2874	8.3	193	21	224		56		85.4
Male	18	179	58	18.1018	4587	7.3	241	13.2		184		8	78.2
Female	18	162	46	17.5278	3113	8.3	185	29	199		50		88.5
Male	18	176	69	22.2753	4752	6.9	235	16.8		218		6	78.8
Female	18	163	49	18.4425	2875	9.2	191	22.2	222		62		86.9
Female	18	160	51	19.9219	3350	8.7	172	24	212		53		87.4
Male	19	167	59	21.1553	5164	7.9	215	17.2		236		5	74.2
Female	19	172	66	22.3094	3000	10.9	172	19.6	237		52		72.2
Female	20	160	49	19.1406	2721	9.2	182	30	242		50		81
Female	20	157	57	23.1247	3337	9.6	160	14	241		44		76.9
Male	18	156	60	24.6548	4142	7.4	220	16.2		208		13	77
Male	18	170	77	26.6436	5163	7.6	187	5.1		273		0	59
Male	18	182	82	24.7555	5859	7.7	235	18		273		0	67
Female	18	159	55	21.7555	3064	9.1	183	25.8	228		57		85
Male	18	171	54	18.4672	4399	7.1	233	15		211		14	82.4
Female	18	158	54	21.6311	2869	10	145	17.8	281		38		67.8
Female	18	169	61	21.3578	3844	9.9	160	22	258		49		79.6
Female	18	166	58	21.048	3876	8.1	197	16	201		41		88.8
Male	18	170	88	30.4498	4625	7.6	210	3		224		0	63.1
Female	18	172	60	20.2812	3876	9.4	161	26	214		41		84.6
Male	18	165	50	18.3655	3592	7.7	208	16		224		5	70.2
Female	18	166	46	16.6933	3033	9	140	11	212		42		72.6
Male	18	184	79	23.3341	4694	7.7	227	4.5		258		0	68.1
Male	19	177	66	21.0667	4714	6.8	265	6.2		213		20	90
Female	18	162	44	16.7657	2819	8.7	140	5.1	244		47		68
Male	19	178	70	22.0932	4724	7.6	200	22		278		5	66.5
Female	18	163	56	21.0772	3210	9	168	20.3	247		56		81.2
Female	18	153	44	18.7962	2869	10.2	170	16.2	279		48		71
Male	18	170	65	22.4913	4455	7.3	205	4		235		8	72.4
Female	18	162	73	27.8159	2886	8.6	180	7.3	285		37		67.6
Male	20	175	75	24.4898	5875	7.4	228	14		215		5	73.6
Female	19	166	58	21.048	3461	9.3	161	13.3	242		32		78.6
Male	19	177	85	27.1314	6800	7.3	225	2		235		0	68.2
Male	18	177	55	17.5556	3963	6.7	276	6		229		10	80.5
Male	18	176	70	22.5981	4647	7.2	235	7.6		239		0	71.4
Female	18	164	49	18.2183	2899	9.4	165	17	238		56		79.2
Male	20	169	76	26.6097	4638	8	201	11.3		252		1	63.4
Female	19	163	52	19.5717	2930	9.3	176	20.3	205		0		74.3
Female	17	159	58	22.9421	2485	8.9	170	20.6	233		32		77.5
Male	19	167	55	19.721	4415	7	235	12.4		206		19	86.4
Male	19	176	86	27.7634	4569	6.9	247	18		236		13	80.5
Female	19	168	60	21.2585	2762	8.9	177	23	221		33		80.1
Female	18	158	44	17.6254	2710	9.1	170	20.2	286		56		73.7
Female	19	158	49	19.6283	3225	9.4	173	3.8	249		35		72.5
Female	19	166	50	18.1449	2943	8.7	183	10.6	216		40		80.9
Female	20	162	48	18.2899	2784	8.3	210	24.4	207		43		87.2
Female	19	166	52	18.8707	3227	8.5	203	17	196		58		91.5
Female	18	162	47	17.9089	3249	9.3	171	7	211		56		82
Female	18	162	45	17.1468	2960	9.2	165	15	267		47		72.1
Female	19	168	49	17.3611	2957	9.2	160	18.6	229		51		79.2
Male	18	184	68	20.0851	5492	7.5	230	7.6		244		6	74.6
Male	18	173	63	21.0498	4304	7.3	220	13.5		184		8	76.6
Female	18	166	74	26.8544	3409	8.9	198	26	251		43		82
Female	18	154	44	18.5529	2892	9.5	150	20.1	255		43		73.8
Female	18	166	51	18.5078	2626	8.5	198	9.6	185		39		79.2
Female	17	159	44	17.4044	2168	9.2	160	18.2	225		48		76.3
Female	19	169	57	19.9573	3148	9.1	173	14	234		45		79
Female	18	162	45	17.1468	2729	8.4	183	19.8	221		46		78.7
Female	19	160	55	21.4844	3149	8.4	178	23	197		30		85.8
Female	19	156	42	17.2584	2610	9.9	160	16	218		31		75
Female	19	152	49	21.2084	3018	8.9	172	26.6	229		51		83.3
Female	18	167	55	19.721	3762	8.9	160	4	219		43		78
Male	18	184	83	24.5156	4388	7.3	235	7		224		1	68.8
Female	18	166	66	23.9512	4023	8.8	175	13.6	215		52		82.4
Female	18	163	55	20.7008	3017	9.6	175	16.8	255		45		76.4
Female	18	163	52	19.5717	2968	8.2	175	17.6	228		48		81.5
Female	18	161	45	17.3604	2761	9.2	165	23	238		45		78.5
Female	18	162	48	18.2899	3135	9.1	155	10.6	228		37		76.8
Female	19	167	57	20.4382	3414	8.4	185	15	205		48		86.8
Female	18	166	62	22.4996	4072	8.7	183	17.8	207		50		87.5
Male	18	168	65	23.03	4202	7.5	205	4.4		236		1	67.7
Female	19	172	55	18.5911	3015	9.1	180	11.2	211		35		79.8
Male	18	180	79	24.3827	4696	8.3	180	4.3		269		0	56.4
Male	17	176	59	19.047	4269	8.1	210	11		236		7	71.5
Male	18	171	67	22.913	5155	6.7	264	18.6		214		15	92
Female	18	165	52	19.1001	3821	9	170	17.4	233		50		82.9
Male	19	168	61	21.6128	4817	7.2	240	22.1		189		13	89.9
Female	18	165	50	18.3655	3634	9	160	14.7	238		41		80.4
Female	18	172	53	17.9151	3190	9.4	175	20.4	239		38		79
Female	18	165	50	18.3655	3068	8.5	201	8.5	213		49		83.8
Male	18	180	69	21.2963	5213	7.3	208	17.1		233		11	80.6
Male	18	176	65	20.984	5237	8.3	190	16.9		228		0	68.6
Male	19	171	56	19.1512	3493	7.5	240	12		213		6	73.7
Female	18	162	50	19.052	3036	8.6	190	20.5	236		32		80.1
Male	18	179	80	24.968	5385	7.5	223	8.1		272		0	67.4
Female	18	168	60	21.2585	3705	8.6	168	10.6	253		34		79.2
Male	17	171	60	20.5191	4329	8.1	215	22		254		0	69.4
Male	19	175	67	21.8776	4393	7.5	220	10		219		0	71.6
Female	18	163	50	18.8189	2966	8.8	155	19	242		52		79.1
Female	18	162	46	17.5278	2719	12	50	17	405		0		33.7
Female	19	168	50	17.7154	2733	10.2	181	18.5	241		50		76.8
Male	17	171	52	17.7832	4526	6.9	260	8.4		211		20	85.1
Female	18	159	50	19.7777	3098	9.4	170	23.4	252		46		78.4
Male	18	183	63	18.8121	4442	7.7	220	10.3		225		4	70.8
Female	18	158	56	22.4323	2965	8.4	175	7.7	205		56		84.1
Female	18	154	46	19.3962	3029	8.7	158	17	185		52		80.4
Female	18	165	50	18.3655	3548	8.5	192	11.4	252		52		83.5
Male	19	170	55	19.0311	4967	7.3	225	12		240		30	93.1
Male	18	182	63	19.0194	5265	7.5	223	7.5		225		0	73.8
Male	18	171	57	19.4932	4847	7.4	232	20.5		224		9	80
Male	18	171	57	19.4932	3953	7.4	240	7.6		214		5	73.3
Female	18	164	74	27.5134	3606	9.8	158	20.5	306		37		65.2
Female	17	163	62	23.3355	2956	8.7	177	22	201		30		83.4
Male	19	166	74	26.8544	5262	8.6	210	15.6		234		0	68.2
Female	18	166	53	19.2336	3905	9.2	177	24.2	209		50		87.6
Female	18	170	58	20.0692	3161	10.1	170	21.5	235		48		78.7
Female	19	161	53	20.4467	3531	8.8	183	19	245		49		83.3
Male	18	180	111	34.2593	4195	9.1	160	20.4		326		0	47.2
Female	18	160	49	19.1406	3728	9.7	155	12.2	236		55		80.5
Male	19	174	58	19.1571	4529	7	240	21.6		225		15	84.2
Male	18	179	69	21.5349	4579	7.3	230	22		218		19	85.3
Female	18	169	60	21.0077	3677	8.5	195	14	255		38		82.2
Female	18	163	54	20.3244	3336	9.2	155	19	222		37		79.7
Male	18	179	85	26.5285	5136	6.8	253	13		216		0	77.2
Female	18	157	48	19.4734	3048	8.2	185	22.9	211		54		86.5
Female	18	158	42	16.8242	3064	9.5	147	8.8	237		50		72.3
Male	19	174	88	29.0659	5604	7.5	220	18.2		215		0	69.8
Female	18	169	52	18.2066	3735	9.9	170	22.5	237		37		80.8
Female	19	163	47	17.6898	2719	9.5	175	18.4	238		28		76.1
Male	19	177	73	23.3011	5880	6.8	270	16		181		25	103.1
Female	19	159	55	21.7555	2414	10	165	16.7	249		45		73.8
Male	18	183	66	19.708	5416	7	257	10.3		208		10	85.3
Female	17	158	54	21.6311	2829	9.4	174	25.8	240		53		80.8
Female	19	154	41	17.2879	2317	8.9	180	12.2	239		35		75.9
Male	18	172	61	20.6193	4294	7.8	215	18.3		231		0	70.5
Male	19	158	51	20.4294	5089	8.1	200	15.3		299		0	63.6
Female	18	160	57	22.2656	3319	9.1	181	21.1	209		46		85.4
Female	18	166	57	20.6852	3503	8.6	198	25.6	195		42		91.3
Male	18	171	55	18.8092	5100	6.7	250	14		197		17	94.4
Female	20	154	54	22.7694	3077	9.9	160	21	225		40		77.9
Female	18	168	56	19.8413	3610	8.3	220	16	183		46		89.4
Male	18	183	78	23.2912	5363	7.7	215	-12		234		9	70.8
Female	18	171	63	21.5451	3309	8.9	178	14	253		49		80.4
Female	18	170	72	24.9135	3098	9.6	155	16	262		49		72.1
Male	18	177	62	19.79	4055	7.6	218	17		236		6	71.9
Female	18	166	63	22.8625	3995	8.7	165	22	217		50		86
Male	19	182	67	20.227	4417	7.2	225	11		228		10	77.6
Female	18	160	50	19.5312	3333	8.5	170	10	184		49		82.4
Female	19	160	48	18.75	3369	9	172	15	205		52		85.3
Female	18	164	54	20.0773	3152	8.6	160	20	196		44		85.3
Male	19	177	60	19.1516	4400	7.2	230	10		207		14	82
Male	19	181	69	21.0616	5233	7.8	205	2		251		0	67
Male	18	176	69	22.2753	4715	7.3	222	2		240		9	73.4
Male	19	170	60	20.7612	4400	7.2	230	10		207		14	82
Female	19	160	47	18.3594	3336	8.5	165	20	240		28		79.5
Male	19	179	60	18.726	4610	7.5	195	19		228		10	75.2
Female	19	160	50	19.5312	3333	8.5	170	10	184		49		82.4
Female	19	180	64	19.7531	4324	8.9	155	17	213		48		83.6
Male	19	180	61	18.8272	4355	6.8	260	25		206		30	102.5
Female	18	165	70	25.7117	3716	8.9	190	18	216		39		82.3
Female	18	165	55	20.202	3926	8.8	175	17	183		40		85.4
Female	19	160	55	21.4844	3238	8.8	170	18	232		39		80
Female	17	171	60	20.5191	4232	8.9	175	21	214		42		85.5
Female	18	161	56	21.6041	3284	9.4	145	16	248		29		73
Male	19	186	74	21.3898	5831	7.7	245	16		233		10	81
Female	18	162	49	18.6709	3446	9.2	175	6	212		38		81.8
Male	19	170	60	20.7612	4777	6.9	250	21		182		20	92.3
Female	19	160	51	19.9219	2849	9.1	168	19	215		17		73.8
Female	20	160	52	20.3125	3663	8.9	173	13	223		38		82.4
Female	18	173	78	26.0617	4122	9.1	170	20	265		20		72
Female	18	159	47	18.591	3344	8.7	155	12	227		20		75.3
Male	18	176	69	22.2753	5106	7.9	215	17		246		0	72.4
Male	18	176	60	19.3698	4554	7.5	210	24		263		9	75.9
Female	18	160	54	21.0938	3990	9.7	153	12	228		52		80.6
Female	18	160	50	19.5312	3333	8.5	170	10	184		49		82.4
Male	18	176	58	18.7242	4672	7.5	240	21		183		6	78.1
Male	18	170	60	20.7612	4777	6.9	250	21		182		20	92.3
Male	18	176	60	19.3698	4282	7.6	225	8		226		1	70.5
Female	18	160	50	19.5312	3333	8.5	170	10	184		49		82.4
Female	18	156	53	21.7784	2936	9	160	15	206		48		80.9
Female	18	163	59	22.2063	3710	8.4	155	7	192		43		86.4
Male	19	182	73	22.0384	5156	7	210	9		232		0	74.8
Male	18	173	85	28.4005	4682	7.7	165	5		242		0	55.3
Female	18	164	57	21.1927	3269	9	175	13	208		34		81.5
Female	17	160	50	19.5312	3660	7.9	200	26	182		47		93
Female	18	173	60	20.0474	3064	9.5	180	17	225		40		79
Male	19	179	67	20.9107	5069	7.1	260	22		204		24	96.5
Female	18	150	43	19.1111	2282	8.4	182	14	224		46		79.4
Male	19	170	60	20.7612	4777	6.9	250	21		182		20	92.3
Female	18	169	60	21.0077	3797	8.9	165	24	214		46		86.1
Female	19	172	56	18.9292	3379	8.7	165	26	214		33		84.9
Male	18	166	53	19.2336	3665	7.9	180	11		229		1	61.8
Male	18	176	65	20.984	4629	7.3	235	18		227		2	74.2
Female	18	173	65	21.7181	3909	9.2	165	14	211		44		82.8
Male	18	183	76	22.694	4455	8	210	12		225		0	69.6
Male	19	173	54	18.0427	3937	7.2	220	17		242		9	75.2
Female	19	165	53	19.4674	3688	8.4	185	19	209		40		87
Male	19	177	78	24.8971	6124	7.7	233	20		228		14	80.3
Male	20	178	62	19.5682	4882	7	235	15		231		9	80.5
Female	18	163	53	19.9481	3813	9	165	10	207		37		82.8
Male	19	176	71	22.921	5440	8.1	210	9		236		0	71.4
Female	18	168	51	18.0697	3550	9.3	170	13	221		43		81.8
Male	19	178	79	24.9337	4917	7.6	205	12		239		0	66.7
Female	18	160	51	19.9219	3452	8.5	152	21	216		35		83.9
Female	19	170	48	16.609	3516	8.3	175	17	199		36		84.2
Female	19	170	65	22.4913	4190	8.6	180	20	195		45		88.8
Female	18	160	71	27.7344	3746	9.1	160	17	218		35		78.4
Male	18	171	75	25.6489	5186	7.8	200	6		255		0	64.8
Female	18	175	72	23.5102	3748	9.2	145	6	264		31		73.2
Male	19	181	65	19.8407	5083	6.6	265	6		211		15	90.2
Male	19	174	96.5	31.8734	5745	8.1	190	4		244		0	56
Female	18	161	60	23.1473	3199	9.6	153	23	229		36		78.5
Male	18	169	63	22.0581	5274	7.4	225	16		245		10	79.6
Female	18	170	61	21.1073	3029	9.3	190	13	238		44		79.1
Female	18	160	50	19.5312	3600	7.9	200	26	182		46		93
Female	18	163	56	21.0772	3595	8.6	170	23	182		43		88
Male	19	170	87	30.1038	5071	7.2	235	7		185		6	70.4
Female	18	167	53	19.0039	3799	8.4	200	17	188		58		95.2
Female	19	171	58	19.8352	4028	8.6	170	11	221		45		82.8
Female	18	162	60	22.8624	3547	10.1	140	7	253		24		70
Female	18	153	59	25.204	3045	8.7	180	13	222		34		76.8
Female	18	153	46	19.6506	3582	8.7	160	21	203		50		87.8
Male	18	170	57	19.7232	4659	7.3	235	4		254		5	70.8
Female	18	160	50	19.5312	3600	7.9	200	26	182		46		93
Male	18	170	56	19.3772	3550	7.3	218	11		214		11	77.3
Female	18	160	49	19.1406	3107	9.2	168	24	243		49		80.4
Female	18	160	74	28.9062	3164	9	170	20	228		48		75
Male	18	175	60	19.5918	4400	7.2	230	10		207		14	82
Female	18	167	56	20.0796	3722	9.3	160	14	207		37		82.8
Male	19	182	64	19.3213	5821	7.6	225	16		212		1	76.2
Female	18	166	69	25.0399	3589	10.1	145	2	295		26		56.4
Female	19	157	45	18.2563	2768	8.9	150	7	219		36		74.9
Female	18	162	50	19.052	3106	8.4	160	14	214		38		80.6
Female	18	164	57	21.1927	3443	7.5	205	19	192		51		97
Female	19	161	47	18.132	2925	8.3	175	14	201		58		87.5
Female	18	165	71	26.079	3306	8.5	168	14	214		35		79.1
Female	18	161	50	19.2894	2749	8.8	165	21	224		55		81.7
Female	17	162	49	18.6709	3594	9	172	21	207		54		87.8
Female	19	164	58	21.5645	3455	8	170	17	225		55		86.9
Female	19	160	50.5	19.7266	2777	9.3	145	6	231		53		74.3
Female	18	159	50	19.7777	3812	9.5	158	17	252		64		86.2
Female	18	166	55.5	20.1408	3689	9.5	140	17	247		37		75.2
Female	18	157	53	21.5019	2856	10.4	135	16	253		52		68.4
Female	18	160	50	19.5312	3333	8.5	170	10	184		49		82.4
Female	18	163	47.5	17.878	3173	8.3	170	9	204		53		85.3
Female	19	155	51	21.2279	2166	9	145	12	209		59		78.5
Female	18	167	79	28.3266	3354	10.1	140	12	259		35		65.4
Female	18	160	50	19.5312	3333	8.5	170	10	184		49		82.4
Female	18	162	59	22.4813	2753	9.3	148	20	252		35		73.5
Female	18	150	45	20	2528	9.5	158	10	222		41		75.5
Male	18	170	60	20.7612	4400	7.2	230	10		207		14	82
Female	18	160	50	19.5312	3333	8.5	170	10	184		49		82.4
Male	18	168	52	18.424	4532	7	225	10		248		10	77.2
Male	18	171	60	20.5191	3823	7.7	238	27		240		18	81.9
Male	18	162	52	19.8141	4145	7.5	235	18		247		12	77.6
Female	19	150	55	24.4444	3260	9.5	148	6	232		41		72
Female	19	168	69	24.4473	3111	9.8	145	5	228		52		69.4
Female	19	158	48	19.2277	2594	8.5	165	14	184		51		79.6
Female	18	166	51	18.5078	3637	9.3	150	6	232		41		77.6
Female	18	163	56	21.0772	3512	8.9	170	20	213		44		84.8
Female	19	161	57	21.9899	3494	10.8	168	16	283		47		68.4
Male	18	164	57	21.1927	4188	7.6	200	8		185		5	68.3
Female	19	160	52	20.3125	3333	8.9	170	9	212		45		81.7
Female	18	165	51	18.7328	2979	9.5	172	26	207		54		85.2
Female	18	170	59	20.4152	2881	9.4	170	13	235		32		75.6
Male	18	182	84	25.3593	5496	8	230	9		263		2	67
Male	19	190	74	20.4986	5343	7.5	190	9		251		6	69.4
Female	18	171	55	18.8092	4235	8.3	180	22	206		54		89.8
Male	19	172	71	23.9995	5009	7.9	215	7		262		3	66
Male	18	173	61	20.3816	4518	7.7	220	5		234		6	71.2
Female	18	167	57	20.4382	3451	8.5	178	8	207		54		87.1
Male	18	170	60	20.7612	4777	6.9	250	21		182		20	92.3
Female	19	160	50	19.5312	3600	7.9	200	26	182		45		92.8
Male	18	170	60	20.7612	4400	7.2	230	10		207		14	82
Male	18	184	72	21.2665	6677	7	253	16		222		1	78.6
Female	18	160	50	19.5312	3600	7.9	200	26	182		45		92.8
Male	18	183	75	22.3954	5252	7.1	255	9		223		4	76.2
Female	19	160	50	19.5312	3222	8.6	165	11	217		51		81.9
Female	19	158	57	22.8329	3531	9.1	180	13	207		46		85.2
Male	18	175	76	24.8163	5382	8.1	200	12		237		0	66.8
Female	18	160	50	19.5312	3333	8.5	170	10	184		49		82.4
Male	19	183	91	27.1731	5159	8.2	190	10		311		0	57.4
Female	18	161	50	19.2894	3758	8.7	185	11	225		52		84.4
Female	18	166	53	19.2336	3187	8.6	150	24	223		30		79.8
Male	18	176	72	23.2438	5049	7.2	220	13		219		6	77.4
Female	18	161	71	27.3909	3586	8.8	180	24	221		54		84.6
Male	19	170	60	20.7612	5111	6.9	260	26		182		22	98.5
Female	19	170	56	19.3772	3454	8.6	180	17	198		56		90.6
Male	19	170	71	24.5675	5363	7.6	220	11		257		18	78.1
Male	18	181	100	30.5241	7139	8.8	190	18		243		0	58.4
Male	18	173	82	27.3982	5396	7.7	215	14		263		0	67.8
Female	18	158	59	23.634	3333	9.3	160	20	240		49		80
Female	18	165	45	16.5289	3048	8.9	180	19	184		55		80.1
Female	19	154	44	18.5529	2971	9.2	155	18.5	244		52		78.1
Female	18	156	44	18.0802	2123	9.4	155	9.3	252		52		73.1
Female	18	151	49	21.4903	3805	9	185	21	233		49		84.6
Female	18	162	50	19.052	2986	9	180	27	225		38		81.7
Female	19	160	49	19.1406	2659	9.9	160	19	247		47		75.2
Female	18	151	51	22.3674	3266	8.7	170	20.3	223		43		81.8
Female	18	155	53	22.0604	2941	9.6	170	21.3	234		50		79.3
Female	18	163	64	24.0882	3354	9.1	160	11.9	245		41		69.4
Female	18	168	65	23.03	4123	8.8	150	13	242		52		78.6
Female	18	154	48	20.2395	3013	10	145	19.5	251		39		72.2
Female	19	166	54	19.5965	3166	9.5	160	16	255		30		75
Female	18	166	51	18.5078	2987	8.2	170	17.8	184		30		80.1
Female	19	158	40	16.0231	2835	8.9	160	21	224		52		78.3
Female	18	158	57	22.8329	3405	9.4	170	25	249		54		83.8
Female	18	158	63	25.2363	3077	10.8	155	12	284		36		60
Female	18	156	49	20.1348	2653	9.1	150	22	269		45		73.9
Female	18	165	45	16.5289	2836	8.7	155	15	228		43		75.2
Female	18	164	54	20.0773	3229	9.1	145	14.5	225		39		76.2
Female	18	160	54	21.0938	3638	8.7	165	23.3	211		46		86
Female	18	165	54	19.8347	3504	8.4	170	11.5	215		46		84.6
Female	18	161	55	21.2183	3505	9.2	160	19.3	221		44		82.4
Female	18	165	51	18.7328	3714	9.7	160	26.3	256		32		79.6
Female	18	160	52	20.3125	2948	9.6	165	17.5	236		46		77.1
Female	18	166	55	19.9594	3076	8.8	160	9.9	262		34		74.6
Female	18	169	57	19.9573	4826	9.1	175	9.8	241		34		78.8
Female	19	157	60	24.3418	3130	9.2	150	13.2	242		40		71.8
Female	18	160	50	19.5312	2467	10.2	155	23.5	262		28		71.4
Female	18	150	46	20.4444	2761	9.5	145	28	228		31		75.7
Female	18	151	58	25.4375	3505	8.8	180	15	184		50		81.3
Male	18	180	88	27.1605	4847	7.8	215	15		249		0	67.3
Female	18	163	59	22.2063	2757	8.8	160	20	214		46		80.5
Male	18	180	105	32.4074	5839	8.5	220	10		297		0	58.6
Male	18	168	63	22.3214	4235	7.8	200	16.5		286		0	62.9
Male	18	174	61	20.148	4831	7	245	17.3		237		6	77.9
Female	18	155	60.5	25.1821	3866	8.4	195	22.9	229		49		84.7
Male	19	185	77	22.4982	5758	6.9	220	6		221		0	76.8
Female	19	163	45.5	17.1252	3354	9.8	155	18	185		57		78.3
Male	17	179	76	23.7196	5214	7.6	230	26		264		0	74.2
Male	19	180	68	20.9877	5745	7.5	205	10.3		241		0	71.4
Female	19	158	56	22.4323	3587	9.1	151	26	229		29		82.2
Male	19	167	51	18.2868	3534	6.8	255	23		232		17	85.1
Female	18	168	60	21.2585	3673	9.5	185	26.3	227		29		83.4
Male	21	179	64	19.9744	4562	7.4	225	12.2		237		0	71.8
Male	19	175	69	22.5306	5176	6.8	255	24.3		225		12	88.9
Female	18	162	46	17.5278	3404	8	155	17.8	199		51		88.5
Male	18	175	77	25.1429	6435	7.5	245	22.4		242		0	73.4
Male	18	180	79	24.3827	5314	7.2	225	14.5		267		10	75.2
Female	18	167	48	17.2111	3768	8.2	190	28	259		57		87.7
Female	18	171	50	17.0993	3879	8.6	200	27.3	183		54		88.7
Male	18	176	66	21.3068	5152	8	215	14.3		244		15	79.6
Female	18	164	57	21.1927	2727	8.7	180	23.2	183		48		84.1
Female	18	166	53	19.2336	3514	8.6	180	20	219		46		85
Male	18	186	61	17.6321	3569	7.4	215	7.4		247		0	63.7
Male	18	180	97	29.9383	5328	7.8	220	11.2		241		0	66.4
Female	18	153	46	19.6506	3552	8.5	185	20	217		50		87.1
Female	18	155	45	18.7305	3373	8.6	180	16.2	232		51		83.4
Male	19	182	88	26.5668	5031	8	195	15		243		0	62.9
Male	18	171	72	24.623	4050	7.7	175	14		234		8	64.1
Male	18	170	67	23.1834	3778	7.3	210	11.8		240		5	69.5
Female	18	160	65	25.3906	3238	9.3	175	8	264		28		71.6
Male	18	173	67	22.3863	4889	7.8	220	12		241		6	72.9
Male	18	171	59.5	20.3481	5346	7.7	230	17.5		232		0	74.8
Female	18	168	56.5	20.0184	5011	8.3	190	26.7	205		51		91
Male	19	171	60	20.5191	5011	7	240	20		215		8	82.3
Female	19	167	51	18.2868	4200	7	185	27	197		56		98
Male	18	171	61	20.8611	3995	7.2	215	17		207		12	80.5
Female	18	160	62	24.2188	3483	9.1	175	18	236		36		78.6
Male	18	179	63	19.6623	4600	6.5	250	3.5		221		11	83.2
Female	18	162	57	21.7193	3200	9.1	180	25.5	224		36		82.5
Male	18	177	66	21.0667	4200	7.2	210	7		206		6	74.7
Female	19	162	52	19.8141	3700	9.5	175	24.5	215		51		86.2
Male	19	175	77	25.1429	5133	7.3	230	11		243		6	72.6
Female	18	162	46	17.5278	2947	8.6	190	24	229		30		81.9
Female	18	155	44	18.3143	3341	8.3	190	20.3	217		54		87.5
Female	18	159	52	20.5688	2946	9.3	160	21.5	224		40		79.2
Male	17	176	75	24.2123	6537	7.1	220	18		215		12	80.4
Female	19	136	46	24.8702	2650	10.5	155	26.9	303		26		55
Male	18	164	58	21.5645	4652	7.9	205	15.4		267		9	72.2
Female	18	167	53	19.0039	3137	9.4	140	9	249		23		68
Male	19	168	50	17.7154	3799	7.3	215	10		244		12	71.9
Male	18	175	67	21.8776	5072	7.5	205	10		238		6	73.4
Female	18	162	59	22.4813	3489	9.6	180	14.5	226		56		83.8
Female	19	172	60.5	20.4502	4094	7.8	207	22	203		45		92.3
Female	18	161	54	20.8325	3171	9.2	170	24	234		46		81.7
Male	18	182	90	27.1706	5975	7.4	195	8		259		1	64.6
Female	18	163	67	25.2174	3244	9.4	155	17	206		42		77.8
Female	18	158	53	21.2306	3010	9.3	182	23	205		43		83.6
Male	19	172	54	18.2531	3399	8.1	150	9		240		0	59.6
Female	18	164	47.5	17.6606	3564	8.5	175	23	218		55		87.7
Male	18	172	87.5	29.5768	3600	7.5	185	13		261		0	55.4
Female	18	158	53	21.2306	2700	8.4	155	15.5	184		51		79.8
Female	19	164	55	20.4491	4045	8.9	165	26.5	234		36		83.8
Female	19	155	48.5	20.1873	2861	9.1	160	19	228		45		78.8
Female	18	162	64	24.3865	3547	8.3	170	16.5	221		43		81.4
Male	19	182	77	23.246	6302	7.2	215	9		262		2	71.2
Female	19	169	56	19.6072	3333	9.4	150	23.5	256		46		77.3
Male	18	176	70	22.5981	5399	7.6	185	15		233		9	73.2
Female	19	156	46	18.902	2916	8.7	200	22	225		44		82.8
Male	20	165	60	22.0386	4636	6.9	240	28		199		21	94.3
Female	18	168	59	20.9042	3745	9.1	180	21	227		43		83.9
Male	18	173	97	32.41	5211	7.9	180	15		274		0	56
Female	18	160	52.5	20.5078	2400	9.6	170	17	185		49		76.9
Male	19	180	91.5	28.2407	5612	8.1	215	5.5		264		0	62.8
Male	19	170	54	18.6851	3654	7.8	230	15		241		14	76.2
Female	18	160	62	24.2188	2740	8.5	160	12.5	246		32		72.9
Female	18	155	51.5	21.436	2391	9.2	160	21	224		42		77.6
Female	18	167	50	17.9282	2940	9.1	185	28	254		35		79.5
Male	19	182	62.5	18.8685	5149	7.4	220	19		245		4	73.8
Female	17	156	50.5	20.7512	3426	10.2	155	8.5	242		36		74.2
Female	18	163	58.5	22.0181	3123	9.9	175	19.5	249		40		76.8
Male	19	174	54	17.8359	4282	7.3	240	14		184		10	76.3
Female	18	160	59.5	23.2422	3929	8.7	185	23	212		42		86.8
Female	18	160	51.5	20.1172	2800	8	180	22	204		30		85.1
Female	18	165	60	22.0386	3505	7.8	210	11	219		54		89.1
Female	18	158	60	24.0346	3369	8.3	185	17	227		54		82.9
Female	19	160	53	20.7031	3682	8.6	195	24	208		45		89.5
Female	18	162	64	24.3865	3410	9	170	23	229		52		82.2
Male	19	173	57	19.0451	4582	7	215	10		247		8	75.8
Male	19	175	72	23.5102	4141	7.7	190	12		264		0	62.6
Male	18	170	55	19.0311	4699	6.8	240	9		184		12	83.8
Female	18	161	53	20.4467	3418	8.2	200	22	196		44		91.3
Female	19	155	46	19.1467	3380	8.6	170	12	219		54		84
Female	18	160	56	21.875	3276	8.3	185	11	183		47		84.3
Male	19	171	58	19.8352	4613	6.6	235	14		231		25	93.5
Male	19	170	70	24.2215	4324	7	210	18.5		245		1	65
Male	18	170	56	19.3772	5116	7.5	225	12		224		12	81.4
Female	18	158	47	18.8271	3582	8.2	175	11	215		48		85.2
Female	19	170	65	22.4913	3808	9.3	170	27.5	224		38		84.4
Male	18	170	56	19.3772	4462	6.8	230	24		234		6	79.3
Female	19	172	60	20.2812	2987	8.4	195	23.7	222		34		83.1
Male	18	167	51	18.2868	4206	8.3	190	15		284		5	60.9
Female	18	159	55	21.7555	3940	8.7	155	6	219		37		80.4
Female	19	161	55	21.2183	3727	8	185	16.4	202		44		89.4
Male	18	168	74	26.2188	4909	7.3	230	-3		239		19	72.5
Male	18	170	54	18.6851	3293	7.4	250	20		257		8	73.2
Female	18	163	64	24.0882	2807	9.2	170	23	241		30		73.6
Female	18	168	55	19.487	2240	8.2	160	6	211		42		77.8
Female	18	173	56	18.7109	3873	9.4	155	1	205		46		75.8
Female	19	152	44.5	19.2607	2633	9.2	160	21	245		31		75.3
Female	18	158	54	21.6311	2773	8.3	180	19	243		54		79.4
Male	19	170	52	17.9931	5343	7.5	195	10		237		8	73.8
Female	18	159	45	17.7999	2141	9	160	6.5	184		38		74.5
Male	18	177	80	25.5354	5177	7.4	200	5		240		0	66.6
Female	18	162	53	20.1951	3886	8.6	155	19.5	227		51		83.5
Female	18	160	62	24.2188	3479	9.9	150	17	243		40		71.8
Female	18	151	45	19.736	2468	9.4	160	21	184		42		77.5
Female	18	165	45	16.5289	3583	9.2	170	25.5	184		44		81.5
Female	18	162	51	19.433	3556	7.5	207	28	195		56		100
Female	18	163	55.5	20.889	3227	8.8	180	19	211		39		82.5
Female	19	163	52	19.5717	3493	7.5	207	28	181		56		101
Female	18	157	47	19.0677	3623	9.3	150	17	204		47		83.6
Male	18	170	54	18.6851	3923	8	210	17.5		235		8	72.4
Male	18	185	69	20.1607	6067	7	250	18		229		11	84.6
Female	18	164	50	18.5901	3066	8.9	170	5	213		28		76.2
Female	18	160	48	18.75	3400	7.5	207	28	197		57		100
Male	18	170	50	17.301	4408	7	240	25		216		15	82.6
Male	18	172	60	20.2812	4699	6.9	245	12.5		217		15	84.8
Female	18	162	70	26.6728	2578	11	135	8.5	287		50		51.2
Male	18	170	73	25.2595	4830	7.5	175	11		218		3	63.7
Female	19	174	62	20.4783	3414	9.1	170	14	224		49		83.3
Female	18	165	70	25.7117	3554	8.8	185	9	238		40		78.4
Male	19	177	73	23.3011	5125	7.5	200	14		229		12	78.6
Female	18	176	62	20.0155	3782	8.7	170	20.5	207		49		86.9
Female	18	160	54	21.0938	3499	9	180	15.5	214		36		83.6
Female	18	162	48	18.2899	3119	9.6	150	-1	236		44		67.8
Male	18	170	51	17.6471	4213	6.8	250	30		240		11	81.5
Female	18	150	46	20.4444	3059	8.4	195	20	208		41		85
Male	20	181	68	20.7564	5385	7.7	215	24		236		6	77.3
Male	19	173	68	22.7204	5083	7	220	6		241		4	74.2
Female	18	155	72	29.9688	4019	9.2	165	13	267		31		70.6
Female	18	165	52	19.1001	2905	9.4	160	26	205		54		84.4
Female	19	159	48	18.9866	2611	9.9	140	20.2	229		31		71.6
Male	19	172	88	29.7458	4842	8.2	210	12		273		1	59.1
Female	18	162	53	20.1951	2791	8.4	170	10	225		63		85.1
Female	17	172	63	21.2953	3358	9.1	175	22	224		48		83.8
Female	18	167	60	21.5139	3609	8.9	151	20	243		55		82.7
Male	18	167	68	24.3824	5713	6.7	220	1		227		7	75.2
Female	18	163	49	18.4425	2830	8.3	190	21	196		32		86
Female	19	162	50	19.052	2860	8.5	180	20	211		42		82.4
Female	18	160	48	18.75	3012	8.9	170	20	222		56		83
Female	19	160	59	23.0469	3004	8.7	170	17	184		52		82
Male	18	167	68	24.3824	4605	7.5	200	5.5		251		0	63.8
Male	18	186	90	26.0146	6556	6.9	230	17.5		235		0	74.6
Male	19	185	63	18.4076	6430	6.3	270	12		184		10	95.5
Female	18	160	55	21.4844	3696	8.4	175	20	227		49		85.3
Male	19	173	77	25.7276	5005	7.7	225	19.5		258		0	69.1
Male	18	180	74	22.8395	6010	7.7	210	13.5		233		0	73
Female	18	165	50	18.3655	2816	9.7	165	25.5	241		35		77.1
Male	18	173	57	19.0451	4480	7	260	15		183		12	83.9
Male	18	180	76	23.4568	5478	7.7	210	7.5		237		0	72
Female	20	173	64	21.3839	3314	8.9	180	25.5	228		42		83.8
Male	18	180	88	27.1605	5697	8.6	215	15.5		301		0	61.6
Female	18	175	100	32.6531	4222	9.1	170	24	256		34		75.1
Female	19	164	49	18.2183	2821	8.5	170	8.5	219		32		78
Male	19	185	78	22.7904	4845	7.2	230	10		227		6	75.5
Male	18	170	60	20.7612	3766	6.6	250	25.5		219		13	86.7
Male	19	174	68	22.46	4498	7.3	200	12.5		226		5	70.4
Female	18	162	58	22.1003	3664	8	200	23	203		40		91.4
Male	19	171	62	21.2031	4731	7.5	210	18.5		227		0	72.5
Female	19	165	67	24.6097	3855	9.1	200	20	228		46		82
Male	18	184	82	24.2202	5739	7	245	10.5		241		0	73
Female	20	167	50	17.9282	3180	8.3	180	11.8	206		57		86.3
Female	18	161	58	22.3757	3605	9.4	156	11	224		39		79.6
Male	18	164	52	19.3337	3731	7.6	218	11		267		4	66.1
Female	19	164	48.5	18.0324	3353	8.3	186	-5.6	219		50		77.8
Female	18	168	55	19.487	3458	8.5	176	16.3	195		52		89.6
Male	18	178	74	23.3556	4854	7.2	207	16.7		247		8	74.9
Male	18	172	56	18.9292	3982	6.7	204	14.5		214		9	80.5
Male	18	175	55	17.9592	4394	7.3	236	18.3		188		12	86.8
Male	18	171	62	21.2031	4972	6.8	230	13.7		245		9	81.7
Female	18	157	55	22.3133	3356	8.8	160	19.5	218		48		82.6
Female	19	168	60	21.2585	2998	10	135	15.5	272		30		66.9
Female	18	160	50	19.5312	2813	8.7	165	16	216		55		82.3
Female	18	171	56	19.1512	3994	8.3	180	18.3	212		52		87.6
Female	19	157	47	19.0677	3105	8.1	174	16.4	182		43		84.6
Male	18	188	72	20.3712	5054	6.9	248	-2.4		213		3	73
Female	19	168	51	18.0697	3205	8.7	189	16.4	183		48		85.1
Male	18	181	65	19.8407	5635	6.8	226	7		242		11	83
Female	19	161	52	20.061	3579	8.5	163	15	223		42		83.2
Male	18	170	75	25.9516	4605	7.1	215	8		278		2	63.6
Male	18	183	95	28.3675	6276	7.3	218	18.6		243		4	68
Female	18	164	48.5	18.0324	2981	9.5	165	25.3	215		40		81
Female	18	160	48	18.75	3738	9.2	166	8.5	224		45		81
Female	19	162	48	18.2899	3479	8.4	168	16	184		49		84.5
Female	18	159	45	17.7999	3375	8	192	20.3	198		38		90
Male	18	170	62	21.4533	4299	7.6	203	12.2		246		9	72.7
Female	19	164	57.5	21.3786	3459	8.8	166	24	221		40		84.7
Male	19	167	45	16.1354	3222	7.8	237	21.3		257		3	65.3
Male	18	175	60	19.5918	4839	7.9	219	25.8		277		5	70.3
Female	18	158	47	18.8271	3233	8.3	182	26	211		50		87.3
Female	19	172	63	21.2953	4426	9.6	173	29	238		46		83.4
Female	18	174	57	18.8268	3703	8.5	192	19.5	259		58		86.3
Male	18	175	75	24.4898	5270	7.4	208	15.6		240		5	71.2
Female	18	163	58	21.83	3616	8.8	141	20	209		52		83.8
Female	18	162	60	22.8624	3979	8.9	163	9.5	229		40		81
Male	18	171	59	20.1771	4543	6.5	288	11.6		211		11	87.4
Female	18	170	58	20.0692	3449	9	195	30	265		46		83.8
Female	18	164	49	18.2183	3101	8.4	140	25	203		44		81.9
Male	19	168	75	26.5731	4894	7.4	213	15.5		252		5	69.1
Female	19	163	45	16.937	3109	9.3	175	12	214		55		78.9
Female	18	160	50	19.5312	2736	9.4	151	14	236		50		76.2
Female	18	157	53	21.5019	3371	8.8	180	18	199		46		86.6
Female	19	171	80	27.3588	3936	10.3	140	16.6	257		36		69.8
Female	18	160	50	19.5312	2610	8.6	177	18.5	214		35		80.2
Female	18	162	51	19.433	3321	9	154	6	225		36		77.7
Female	19	166	60	21.7738	3347	9	162	23	218		53		83.5
Female	18	165	70	25.7117	3791	8.8	182	22.5	224		46		82.8
Female	18	165	52	19.1001	3465	9.1	154	14	218		48		81.8
Female	19	155	45	18.7305	2894	9.8	143	10	241		40		70.8
Female	19	159	47	18.591	3461	8.7	170	20	238		56		85.2
Female	18	160	57	22.2656	2491	9.2	162	11.6	228		27		74.2
Female	19	162	52	19.8141	3101	9.2	161	14	185		46		78
Female	18	160	52	20.3125	2839	8.7	193	23	223		46		83.1
Female	20	160	48	18.75	3050	10.2	150	18.6	242		40		73.6
Male	18	170	58	20.0692	5527	6.4	273	19.5		192		30	109.5
Female	19	168	64	22.6757	3575	9.5	157	14.5	267		46		77.6
Female	19	170	55	19.0311	3615	8.6	183	28	217		50		88.7
Female	18	162	49	18.6709	3371	8.3	180	14	216		40		84.7
Female	22	155	50	20.8117	2379	8.6	166	21.5	267		54		77.5
Female	18	160	55	21.4844	2994	7.7	193	15.2	249		50		83.1
Female	19	165	50	18.3655	3425	8	188	13.7	196		54		92
Female	18	170	56	19.3772	3857	8.2	207	18	198		45		91.6
Male	18	175	55	17.9592	3800	7.1	244	0		231		4	66.5
Female	18	163	53	19.9481	3330	8.4	182	21.5	232		42		83.4
Female	19	160	50	19.5312	3324	8.5	194	17	211		60		89.2
Male	18	182	62.5	18.8685	4885	7.4	254	5		234		1	72.5
Female	18	165	52	19.1001	3485	8.9	155	8	221		42		80.8
Female	19	168	53	18.7783	2745	8.5	167	22	222		45		81
Male	17	175	72	23.5102	4683	7.2	240	8		241		2	72
Male	18	178	75	23.6713	5355	7.8	222	8.5		272		1	69.6
Male	18	173	58	19.3792	4680	6.9	210	12.5		242		5	74.4
Male	18	178	74	23.3556	5105	7.8	208	2.8		256		5	69.6
Male	18	177	74	23.6203	6300	7.3	240	13.5		263		8	77
Female	18	165	60	22.0386	3589	8.8	177	20	274		55		81.9
Female	18	165	58	21.3039	3416	9.4	142	19	249		40		77
Female	18	159	60	23.7332	3425	8.5	183	16	223		48		85
Male	18	178	72	22.7244	5045	8.2	208	15		271		1	69.2
Male	19	175	80	26.1224	5385	7.3	240	23.5		255		1	72.9
Male	19	180	65	20.0617	5446	6.9	242	13.2		241		22	90.2
Female	18	163	56	21.0772	3137	8.9	163	20.1	184		45		80.4
Male	19	168	55	19.487	3858	6.5	252	16.3		197		30	101.6
Male	19	169	53	18.5568	3740	7.5	226	26		216		7	76.5
Female	17	168	55	19.487	2835	8.3	195	22	227		38		82.7
Female	18	160	45	17.5781	2803	8.5	174	13	213		52		82.4
Male	19	173	70	23.3887	5067	7.4	215	2.2		242		2	69.8
Female	18	175	59	19.2653	3198	9.9	140	19.5	236		49		74.8
Female	18	173	54.5	18.2098	3420	8.5	195	6	216		55		87.1
Male	18	178	58	18.3058	4200	6.9	248	15		202		15	87.3
Female	19	152	47.5	20.5592	2289	8.9	163	14	229		28		75.2
Male	18	179	75	23.4075	4620	6.9	240	14		236		9	80.5
Male	18	177	73	23.3011	5080	7.2	220	21.5		254		12	81.2
Female	18	162	50	19.052	2649	9	165	11.5	224		50		78.3
Female	18	154	44.5	18.7637	3050	8.8	172	23	184		45		82
Female	18	161	54	20.8325	3011	8.9	143	13.5	185		39		75.2
Female	18	161	52	20.061	3713	8.7	178	18	221		40		84.2
Male	19	180	58	17.9012	5175	7.5	256	19.5		247		8	80.2
Male	18	178	61	19.2526	6370	7.4	235	23.5		231		12	83.9
Female	18	168	54	19.1327	3356	8.4	212	18.5	184		39		91.8
Female	18	162	55	20.9572	3428	8.9	170	18	217		39		84
Female	19	167	53	19.0039	5110	9.2	190	21	223		50		85.5
Female	18	168	55	19.487	2804	9.2	165	24	222		50		81.2
Female	19	164	58	21.5645	3897	9.4	160	18	229		44		81.4
Female	19	169	65	22.7583	4580	9.4	185	18	225		23		79
Male	18	179	81	25.2801	5455	7.7	200	15		249		2	67
Female	18	157	46	18.662	2954	9.1	180	25	226		46		82
Female	20	161	48	18.5178	2519	9.3	155	14	209		37		77.9
Female	20	155	55	22.8928	3244	8.8	173	15	232		41		79.8
Female	18	172	60	20.2812	3217	9.9	130	14	268		36		68.2
Male	18	180	74	22.8395	5757	7.2	230	23		214		8	82.6
Female	18	171	57	19.4932	3854	8.8	180	19	219		50		85.1
Female	18	160	46	17.9688	3866	9	190	21	233		69		96.6
Female	18	164	54	20.0773	3851	8.7	173	15	217		46		84.8
Female	19	162	60	22.8624	2629	8.9	174	19	222		27		78
Male	18	182	65	19.6232	5540	6.9	220	18		216		15	86.6
Female	18	170	54	18.6851	3691	9.1	183	26	234		36		84.6
Male	18	167	52	18.6453	5540	7.4	230	15.5		252		8	77.4
Male	18	186	69	19.9445	4806	6.9	224	14		225		10	82.3
Female	18	163	53	19.9481	2854	8	174	18	204		45		85.4
Male	18	188	67	18.9565	4809	7.3	213	16		279		5	68.9
Male	19	181	74	22.5878	4315	7	248	11		232		6	76.2
Female	18	156	52	21.3675	3443	8.4	168	22	229		42		84.3
Female	19	160	42	16.4062	3400	8.7	160	22	243		32		78.3
Male	19	180	80	24.6914	5820	7.6	208	11		233		5	70.6
Female	18	167	54	19.3625	3655	9.4	185	26	239		44		84.2
Female	18	173	57	19.0451	4013	8.7	180	20.8	225		44		84.9
Female	18	165	63	23.1405	3561	9.2	160	17	185		43		81
Female	18	160	42	16.4062	2706	9.4	157	13	225		43		73.3
Female	18	170	66	22.8374	4182	9.9	168	22	249		42		79.9
Female	18	163	56	21.0772	3650	9.9	160	25.8	248		0		73.4
Male	18	173	61	20.3816	4350	7.8	224	18		275		6	68.2
Female	18	168	55	19.487	2670	8.6	200	24.5	224		32		82.1
Male	19	170	59	20.4152	4376	7.4	228	13		231		19	81.6
Male	18	180	68	20.9877	5187	7.1	238	21		245		10	81.9
Female	18	163	53	19.9481	3691	9	157	15	228		43		81.2
Male	19	181	59	18.0092	3590	7.5	265	11		214		18	82.9
Female	18	158	52	20.83	3211	9.5	170	14	232		40		78.4
Female	18	161	61	23.533	3720	9.3	180	27	232		62		90
Female	17	155	51	21.2279	1633	8.7	185	18	212		46		71
Male	18	175	60	19.5918	4473	7.5	245	19		242		14	80
Female	17	161	63	24.3046	3070	8.9	160	15	237		35		74.2
Female	18	164	53	19.7055	3650	8.8	170	17	236		46		82.4
Female	18	168	60	21.2585	3600	10.3	138	24.1	265		39		74.1
Male	18	182	74	22.3403	4850	8.1	233	11		314		8	66.7
Male	18	177	61	19.4708	5350	7.7	242	5		252		6	74
Female	18	155	44	18.3143	3595	9	174	22	214		56		87.3
Female	18	168	52	18.424	3650	9.4	173	18	239		45		81.4
Female	18	163	53	19.9481	4174	8.6	184	21	215		50		87.2
Female	18	160	45	17.5781	3408	8.9	186	10	226		56		85
Male	19	177	59	18.8324	4620	6.8	258	11		248		5	76.8
Male	18	165	65	23.8751	4823	7.3	220	16		254		6	73.5
Male	18	164	60	22.3081	4010	7	203	14.5		242		5	69.3
Female	18	164	57	21.1927	4089	9.4	190	24.5	216		49		87.1
Female	18	170	60	20.7612	3570	9.8	163	22.5	235		50		81.9
Female	18	162	49	18.6709	3855	8.6	200	11	211		57		87.8
Female	18	162	58	22.1003	3708	8.7	167	26	227		42		85.4
Female	19	168	63	22.3214	3600	9.5	160	25.5	233		55		84.4
Female	18	158	45	18.026	3011	9.1	175	18	216		48		81.8
Female	18	160	50	19.5312	3193	9.5	190	24.5	208		52		86.3
Female	18	165	50	18.3655	3686	9.3	168	25.5	218		43		84.1
Female	18	176	60	19.3698	3427	10.1	164	20	256		33		77
Male	19	179	63	19.6623	5650	6.9	247	20		256		9	82.5
Male	18	174	56	18.4965	4570	7.6	230	10		268		8	72.3
Female	18	168	53	18.7783	3778	7.5	215	27	195		58		101
Male	18	173	86	28.7347	6150	6.9	248	15		314		5	64.6
Male	18	168	55	19.487	4537	7.2	223	5		245		6	71.2
Female	17	160	60	23.4375	3450	10.3	151	19	228		28		77.8
Male	18	175	72	23.5102	6260	7.9	205	15		274		8	71
Female	18	170	56	19.3772	3605	7.8	190	18	184		47		87.3
Male	19	167	86	30.8365	5095	8.1	210	4		303		0	58
Female	19	161	45	17.3604	2033	8.4	190	8	205		42		79.9
Female	19	160	43	16.7969	2301	9.8	155	19	262		40		69.1
Female	17	165	53	19.4674	3906	8.3	190	22	228		55		88.1
Female	19	161	50	19.2894	3544	8.8	170	11	214		44		83.4
Female	18	157	50	20.2848	3486	8.8	150	5.7	214		34		78.6
Female	18	166	61	22.1367	3492	9	160	17.8	232		46		82
Male	18	173	67	22.3863	5298	7.2	251	21.2		226		9	82.7
Female	19	168	65	23.03	3503	8.7	180	21	182		40		87.9
Female	18	157	47	19.0677	2915	9	160	24.5	226		45		80.6
Female	18	166	49	17.782	2672	9.7	151	13	216		22		73
Female	18	150	45	20	2732	9.2	165	24	224		0		72.4
Female	18	168	81	28.699	3690	9.8	153	12	274		26		67.6
Female	18	163	58	21.83	3695	9.2	155	17.3	223		36		80.8
Female	18	152	45	19.4771	2718	9.5	155	17.8	185		34		75.7
Female	19	168	46	16.2982	2802	8.5	180	11	204		45		80.2
Male	18	181	65	19.8407	5112	7.2	230	12		233		0	74.4
Female	19	159	50	19.7777	3327	8.9	130	13	215		11		68.3
Female	18	162	53	20.1951	3030	8.2	183	8.5	240		57		81.6
[truncated: 9,563 more rows]

## Sheet: Y2021
Gender	Age	Height (cm)	Weight (kg)	BMI (kg/m2)	Vital capacity (ml)	50-m dash (s)	Standing long jump (cm)	Sit-and-reach (cm)	800 m (s)	1000 m(s)	Sit-ups (count)	Pull-ups (count)	Total score
Male	19	173	85	28.4005	4552	8.5	177	11		283		0	52
Male	19	185	76	22.206	5455	7.9	200	-3		244		0	58.4
Male	18	183	84	25.0829	6418	7.3	248	14.5		253		0	71.2
Female	18	160	77	30.0781	3829	9.2	183	22.7	225		45		78.4
Male	19	172	76	25.6896	4384	7.4	173	4.9		242		0	58
Female	18	156	66	27.1203	3080	8.3	162	18	214		42		79
Male	18	176	62	20.0155	4598	7.6	210	24.1		248		2	71.6
Male	18	173	69	23.0546	5289	7.2	233	14.9		256		0	73.6
Male	18	170	53	18.3391	5018	7.5	219	15.5		232		8	77.7
Male	18	176	64	20.6612	2958	8	220	5.5		272		0	61.3
Female	18	161	54	20.8325	3753	9.3	144	15.2	223		47		79.4
Female	18	164	60	22.3081	2668	9.9	148	16.5	272		37		70.2
Male	18	172	63	21.2953	5546	7.4	205	14.6		254		0	70.8
Male	19	167	65	23.3067	3300	7.2	203	16.2		244		0	62.5
Male	18	181	70	21.3669	6591	7.4	239	23.9		265		0	74.5
Male	18	178	53	16.7277	4708	7	268	18.4		251		7	75.8
Male	18	165	65	23.8751	4365	7.5	208	18		273		0	66.2
Female	18	169	56	19.6072	1931	7.9	200	8.7	239		44		76
Female	18	165	46	16.8962	3316	9.9	151	5.6	255		39		69.7
Male	18	179	65	20.2865	5459	7.5	211	10.5		276		4	68
Male	18	170	59	20.4152	3777	7.2	228	7.1		252		5	69.1
Female	18	155	46.5	19.3548	2183	11	123	23.6	293		42		52.9
Male	18	176	51	16.4644	4376	7.3	235	5.5		218		5	70
Male	19	180	62	19.1358	5725	7.2	218	14.5		234		10	80.2
Female	18	165	52	19.1001	3581	11.4	167	10.8	259		24		61.8
Female	18	162	44	16.7657	3691	9.2	203	29.1	211		34		84.3
Male	18	179	63	19.6623	5004	8.4	205	26.5		305		1	65.5
Female	18	161	67	25.8478	3990	10.1	148	16.1	268		40		71.6
Female	19	148	47	21.4573	2310	8.9	175	10.6	233		30		75.5
Male	18	168	75	26.5731	4575	7.9	216	18.1		262		0	66.3
Male	18	191	101	27.6856	5484	7.2	220	2		283		0	63.2
Male	18	180	85	26.2346	6182	7.3	215	20		241		5	72.7
Female	18	164	52	19.3337	3576	9.8	160	17	226		34		79.4
Female	19	158	54	21.6311	3628	9.1	165	21	217		54		86.2
Female	18	156	51.5	21.1621	2956	8.5	140	22.3	184		51		78.8
Male	18	176	65	20.984	5048	6.5	250	22.5		213		1	84
Female	18	167	46	16.494	3083	8.1	165	11.5	183		57		81.6
Male	18	169	52	18.2066	4552	8.1	205	13.5		277		3	64.2
Male	18	178	81	25.565	4276	7.2	232	14		262		0	66.7
Male	19	177	89	28.4082	6233	8	208	21.2		283		0	62.5
Female	18	155	45.5	18.9386	2848	8.5	162	12	243		40		77.2
Female	18	171	58	19.8352	3628	8.5	185	23.8	198		56		92.6
Male	18	186	61.5	17.7766	3989	7	250	4		241		4	68.5
Male	18	181	62.5	19.0776	5048	6.4	265	22.4		206		0	86
Female	18	162	61	23.2434	3726	8	208	24.5	255		42		87.3
Male	18	176	61	19.6927	5358	7.6	210	19.5		249		0	72.9
Male	18	180	47	14.5062	4608	8	208	16.4		283		1	62.5
Female	18	175	67	21.8776	3387	9.1	142	24	236		46		80
Female	19	155	44	18.3143	3204	10.3	155	19.3	259		38		74.4
Female	18	163	54	20.3244	3292	10.1	161	20.2	236		22		73.5
Male	18	185	60	17.531	5279	6.8	262	25		206		6	84.5
Male	18	175	61.5	20.0816	4300	7.2	235	20.5		268		5	71.3
Female	18	159	69	27.2932	2564	9.4	135	18	295		36		58.9
Male	17	175	59	19.2653	4441	6.6	270	24		277		10	82
Female	19	153	48	20.5049	3021	10.3	151	28	232		22		74.2
Female	17	155	48	19.9792	2083	9.2	165	27	226		30		76.8
Female	19	162	66	25.1486	3642	10.6	160	19	263		30		68.8
Female	18	163	53	19.9481	1785	10.6	151	23	233		39		60.4
Female	18	162	56	21.3382	2882	10.2	145	19.4	231		42		73.2
Female	18	175	61	19.9184	3488	9.2	160	3.3	235		48		75.4
Male	18	170	55	19.0311	3418	7.4	219	24.5		267		11	74.5
Male	18	160	50	19.5312	4044	7.6	242	6		245		5	69.7
Male	18	180	70	21.6049	5435	7.6	243	-4		243		0	66.4
Male	19	172	61	20.6193	4488	7.3	219	12.3		184		11	78.6
Male	18	175	70	22.8571	5662	7.9	205	10.4		212		0	73.2
Female	18	161	52	20.061	3903	8.4	165	20.7	181		52		90.9
Female	18	162	55	20.9572	3235	8.4	192	3	238		35		75.5
Female	18	173	60	20.0474	3583	8.9	150	9	244		30		72.6
Male	18	171	80	27.3588	4790	7.7	220	9.5		247		2	66.9
Female	19	158	46	18.4265	3517	9.6	141	23.2	239		41		78.4
Female	19	155	46	19.1467	2306	9.6	154	17	222		36		74.9
Female	18	147	51	23.6013	2206	9.1	154	19.5	246		39		74.4
Female	18	155	43	17.898	2429	9.4	166	19.4	207		38		79
Male	18	170	74	25.6055	4278	11.1	130	10.8		296		0	38.7
Female	18	162	57	21.7193	3399	9.6	163	21.8	238		41		80
Female	18	154	52	21.9261	2209	9.6	165	10	275		33		67.8
Male	19	168	63	22.3214	3905	8	194	9.2		248		4	63
Male	18	175	95	31.0204	4991	8.4	174	3.9		276		0	52.5
Male	19	181	64	19.5354	6042	7.5	235	15		211		10	83
Male	19	169	54	18.9069	4650	7.7	242	9		235		10	77.5
Male	19	172	54	18.2531	3725	7.6	218	13.4		276		4	63.9
Female	19	159	48	18.9866	2165	10.2	140	10.2	269		26		64.3
Female	19	160	48	18.75	3246	8.8	212	30.3	204		25		86.5
Female	20	156	48	19.7239	2645	9.7	143	10.4	244		26		70
Female	18	160	51	19.9219	3466	9.2	156	19	264		31		77.4
Male	19	164	52	19.3337	4288	7.5	213	-8		233		5	63.9
Female	19	162	57	21.7193	3533	9.6	154	26.4	227		47		83
Female	19	156	66	27.1203	3336	12.1	125	20	289		25		46.5
Female	19	156	45	18.4911	2487	10.6	145	13.5	252		31		64.2
Female	18	158	82	32.8473	2764	9.6	148	21	278		15		56.8
Female	18	155	48	19.9792	2224	9.5	148	20	256		31		70.8
Female	19	170	63	21.7993	2981	10.3	149	5	322		20		52.7
Female	19	171	68	23.255	4297	8.4	177	10	184		50		84.3
Female	18	165	46	16.8962	3289	8.5	145	7.3	232		24		70.8
Male	18	170	59	20.4152	4460	7	207	24		264		6	72.9
Male	19	178	72	22.7244	5180	7	240	12		236		2	76.4
Male	18	180	66	20.3704	4819	7	235	1.4		253		15	76.9
Male	19	170	71	24.5675	4850	7.6	200	-8.7		283		1	54.3
Male	19	178	63	19.8839	5144	7.5	200	15		238		2	71.2
Female	18	159	63	24.9199	2651	9.1	165	14	269		34		70.4
Male	18	179	72	22.4712	6032	6.9	229	14		252		3	76
Female	18	157	50	20.2848	2881	9.6	162	11.6	208		46		79
Female	19	165	57	20.9366	3891	9.1	195	23	235		38		84.4
Female	18	157	63	25.5588	3542	9	145	25	362		27		60.9
Female	18	167	55	19.721	3351	9.1	163	26	241		41		81.4
Male	19	166	70	25.4028	4221	8	210	18		254		2	64.9
Male	19	170	57	19.7232	4348	7.4	220	13.5		241		5	70.8
Female	18	160	50	19.5312	3069	9.3	172	10.3	233		44		78
Female	19	161	59	22.7615	3935	9.3	165	24.6	223		41		83.7
Male	18	182	70	21.1327	4816	7	234	10		255		2	72.7
Male	18	181	72	21.9774	5606	7.5	225	3		255		7	73.2
Male	18	176	57	18.4013	4495	7.3	217	18		239		3	71.4
Male	18	177	72	22.9819	5123	7.4	255	20		256		1	74.9
Female	18	150	61	27.1111	3030	9.3	162	23.5	262		31		72.8
Female	19	163	59	22.2063	2176	9.3	159	23.2	224		43		77.3
Female	18	168	52	18.424	2762	9.1	157	4	212		38		74.1
Female	18	170	70	24.2215	3907	9.3	155	10	347		38		61
Male	19	175	65	21.2245	3681	7.4	215	14.6		253		5	68.2
Female	19	166	59	21.4109	3717	9.6	155	18	234		16		73.4
Female	18	168	75	26.5731	3736	9.5	140	24.5	319		35		61.9
Female	19	155	60	24.974	3414	10.1	110	8	245		36		66.6
Female	18	168	65	23.03	3533	9.7	175	26	243		56		85.2
Female	18	156	59	24.2439	3646	9.4	148	24	242		58		80.5
Male	19	171	60	20.5191	4171	6.9	220	17		238		13	80.4
Male	19	176	60	19.3698	5052	8	210	5		271		0	68
Female	18	172	60	20.2812	2919	9.5	130	13.5	249		42		69.9
Male	18	175	70	22.8571	5836	7.5	205	7.5		278		16	75.1
Male	18	175	75	24.4898	5314	8	210	13.5		271		0	66.4
Male	18	182	74	22.3403	5334	7.2	230	8.5		245		0	73.2
Female	18	166	60	21.7738	2932	9.9	120	11.5	241		43		67.5
Male	18	185	85	24.8356	6398	7.1	190	21		246		0	67.5
Female	19	160	65	25.3906	2888	8.5	155	16.5	231		40		75.4
Female	18	172	62	20.9573	3772	8.3	195	20	206		47		89
Male	19	176	55	17.7557	5161	7	240	11		229		20	84.8
Female	19	169	70	24.5089	3807	9.5	165	21	241		40		77.7
Male	19	171	79	27.0169	4018	8.4	180	8		278		0	52.9
Female	19	161	54	20.8325	2633	8.8	145	22	226		54		78.2
Male	19	176	66	21.3068	6957	6.8	240	17.5		245		0	78.4
Female	18	162	60	22.8624	2460	8.8	105	23	242		28		69.6
Male	18	179	68	21.2228	4332	7.3	205	15		229		0	70.4
Female	19	152	54	23.3726	3066	7.6	195	17	211		48		87.6
Male	18	176	60	19.3698	4981	7.1	215	18		242		0	73.9
Female	18	155	50	20.8117	3360	9.9	145	25.3	243		48		75.5
Female	18	157	52	21.0962	3216	9.9	175	17.5	261		37		75.5
Male	18	177	60	19.1516	4653	7.4	235	13.5		264		0	70
Female	18	157	60	24.3418	3644	9.3	160	23.5	255		33		76.4
Female	20	157	45	18.2563	2867	9	145	21	231		31		74.9
Female	18	160	52	20.3125	3089	10.1	140	23.5	254		30		71.4
Male	19	178	75	23.6713	5110	7.4	220	22		264		0	73.2
Male	18	180	66	20.3704	5536	6.5	260	8		203		6	85.1
Male	19	176	62	20.0155	4019	7.3	220	17		248		4	69.7
Male	18	178	75	23.6713	3838	7.4	229	6		246		2	68.2
Male	18	177	63	20.1092	4374	7	210	4		223		9	76.6
Male	18	174	78	25.763	5170	7.3	200	17		300		1	62.4
Male	19	176	83	26.7949	5547	7.4	205	14		249		1	68.2
Female	18	160	42	16.4062	2552	9.2	150	17	224		43		72.7
Male	19	174	77	25.4327	5061	7.5	180	2		267		1	58.6
Female	19	162	63	24.0055	3349	9.2	145	20	241		41		72.5
Male	18	173	62	20.7157	4507	7.4	225	7		256		4	68.6
Male	18	172	75	25.3515	4859	7.5	210	7		254		1	66.3
Male	18	177	70	22.3435	4978	6.6	250	5		286		1	73.3
Male	18	172	60	20.2812	4503	7.4	220	5		240		2	69.2
Male	20	173	75	25.0593	5528	7.3	230	10		246		1	70.4
Male	18	173	64	21.3839	5523	7.2	215	6		209		4	75
Female	19	159	51	20.1733	2567	8.6	183	19	223		40		80.1
Female	19	155	48	19.9792	3248	8.2	153	15	222		37		80
Male	19	175	70	22.8571	5423	7.8	200	5		295		1	62.4
Male	18	173	62	20.7157	4547	7.5	200	6		241		1	66
Male	18	179	67	20.9107	5236	8.2	170	11		281		1	60.6
Male	18	177	62	19.79	4218	7	228	10		225		5	74.1
Female	18	167	51	18.2868	3609	8.6	168	22	265		52		82.1
Female	18	160	47	18.3594	3290	9.7	150	10	226		47		76.2
Female	18	160	50	19.5312	3098	8.8	155	17	235		25		75.4
Male	18	178	66	20.8307	4623	7.8	190	0		297		1	54.1
Male	18	173	63	21.0498	4211	6.3	210	3		216		2	73.7
Female	19	154	50	21.0828	3542	8.8	155	26	243		30		81.8
Female	18	165	58	21.3039	3256	9.7	150	14	239		35		74.8
Male	19	175	65	21.2245	4712	7	180	8		300		7	62.4
Female	19	169	49	17.1563	2921	8.6	162	17	246		48		78.1
Female	19	162	57	21.7193	2812	8.9	167	25.5	236		42		80.1
Female	18	164	57	21.1927	3751	9.3	152	30.5	254		50		82.1
Female	18	172	82	27.7177	4319	8.4	167	23	235		40		80.8
Male	19	170	70	24.2215	4305	8	200	13.5		272		2	61.4
Male	18	173	61	20.3816	3911	8.1	216	16.2		264		5	67.2
Male	18	173	56	18.7109	3238	6.7	260	10		227		3	75.2
Male	19	173	75	25.0593	5227	7	225	11		241		2	72.2
Female	18	164	57	21.1927	4754	11.3	145	8.5	263		48		63
Male	20	180	58	17.9012	4384	6.7	255	-12		276		1	65
Male	19	180	77	23.7654	5628	7.9	207	2		235		0	68.2
Male	19	176	62	20.0155	4588	7.1	215	10.3		257		2	70
Male	18	182	79	23.8498	5671	7.5	200	14.5		268		2	68.6
Male	19	180	71	21.9136	5687	7.1	222	11		204		6	79.6
Female	18	172	59	19.9432	4730	7.8	201	18	213		48		89.3
Male	19	173	62	20.7157	4646	7	200	-9.5		268		1	60.8
Male	18	178	57	17.9902	4127	6.8	255	8		227		8	79.6
Male	19	170	58	20.0692	4232	7.1	215	15.5		234		4	71.3
Male	19	178	62	19.5682	4693	6.6	275	5.5		198		12	89.8
Female	18	157	53	21.5019	3234	9.1	175	16.3	237		53		80.9
Female	19	154	47	19.8178	2824	8.9	170	12	237		40		77.4
Female	18	165	45	16.5289	2627	8.5	202	21	251		36		77
Male	17	173	58	19.3792	4866	7.3	250	25		231		4	77.3
Male	19	170	71	24.5675	4524	7.3	230	13		288		2	63.8
Female	18	165	53	19.4674	3653	8.5	194	18	244		44		84.1
Female	18	161	57	21.9899	3482	8.8	165	18.5	234		30		81
Male	18	175	64	20.898	3848	6.5	250	12		289		6	72.8
Male	18	168	60	21.2585	4542	8.4	223	13.5		254		2	67.4
Female	19	163	52	19.5717	2470	9.8	165	19	242		40		74.6
Male	19	177	65	20.7476	4968	8	250	18		245		9	78.3
Female	19	158	45	18.026	3037	9.4	160	28	251		36		77.8
Female	17	163	50	18.8189	3577	10	170	23.5	235		37		80.4
Female	19	156	59	24.2439	3154	9.3	160	16	185		26		74
Female	18	157	44	17.8506	2788	9.6	182	18	249		35		75.9
Female	18	159	62	24.5243	3538	9.4	135	15.5	240		46		72.4
Male	19	166	65	23.5883	3965	7.8	265	11.5		240		5	71.9
Male	19	185	106	30.9715	5127	8.4	204	7.2		295		0	56.6
Female	18	176	55	17.7557	4062	7.6	212	25.6	214		43		93.1
Female	18	175	58	18.9388	4049	9.5	181	25.1	219		20		80.1
Female	18	178	57	17.9902	3234	9.1	151	16	246		27		75.5
Male	19	185	64	18.6998	3502	10.1	231	17.3		295		1	49.7
Male	19	167	61	21.8724	4204	7.5	209	20		301		1	64.4
Male	18	183	126	37.6243	6164	8.8	188	15		326		0	52
Male	18	171	62	21.2031	5117	7	234	20.6		238		12	83.9
Female	18	166	63	22.8625	3803	8.6	171	10.1	259		41		79.6
Male	19	178	64	20.1995	4197	7	213	14.3		207		9	80.3
Female	18	155	43	17.898	3083	8.5	172	12.1	216		40		81.2
Male	19	176	59	19.047	4226	6.9	232	18.7		216		20	86.9
Male	18	174	60	19.8177	4177	7	203	17.6		184		9	77.2
Male	18	178	77	24.3025	3619	8.1	196	11		276		1	56.2
Male	19	174	55	18.1662	3994	7.1	224	1.5		221		5	68.9
Female	18	153	50	21.3593	2313	8.6	167	26	319		29		65.3
Female	19	172	55	18.5911	3615	8.4	187	20.3	224		41		85
Male	18	173	59	19.7133	3512	7.4	187	5.9		278		2	57.3
Female	19	156	55	22.6003	1961	10	147	17.5	277		40		64.9
Female	19	169	59	20.6575	3124	10.3	140	21	314		27		60.5
Female	18	170	53	18.3391	2567	8.5	199	24.5	262		41		79.8
Male	18	179	62	19.3502	5180	7	243	14.6		263		8	78.4
Male	18	177	60	19.1516	4391	7.8	200	7.2		263		3	64.2
Female	18	165	58	21.3039	2212	8.7	155	14	323		23		59.2
Male	18	172	64	21.6333	4533	7.1	227	17.2		238		3	72
Female	18	171	68	23.255	4033	9.2	194	20.3	285		44		76.3
Male	19	172	59	19.9432	4111	7.6	216	11.3		233		10	75.4
Female	18	169	63	22.0581	3254	10.1	167	17.3	272		25		71.8
Female	18	160	50	19.5312	3234	8.7	166	17	226		32		79.8
Female	18	162	80	30.4832	4142	8.7	161	13	262		27		71.6
Female	18	161	65	25.0762	3350	10.7	147	22	257		38		68.2
Female	18	164	45	16.7311	3613	8.8	182	17	185		53		81.6
Female	19	167	69	24.7409	3193	10.2	155	12	246		40		71.2
Female	18	155	45	18.7305	2655	9	137	12	257		48		71.2
Female	18	158	42	16.8242	2610	9.6	166	23	245		40		73.4
Male	19	170	60	20.7612	4915	6.8	236	18		192		17	92.9
Male	18	173	61	20.3816	4463	6.9	251	9.4		227		3	75.4
Male	20	175	60	19.5918	5009	7.4	175	-7		234		1	59.3
Male	19	165	55	20.202	3193	9.5	170	2		296		0	44
Male	19	168	52	18.424	3266	7.2	210	2		292		3	59.9
Male	19	165	51	18.7328	4026	8.1	206	3		287		0	60.1
Male	18	180	90	27.7778	4852	7.5	196	13		239		2	65.3
Male	19	173	60	20.0474	5010	9.4	208	7		256		1	62.9
Female	19	158	48	19.2277	3153	8.8	166	24.8	248		49		81.5
Female	18	163	52	19.5717	3402	9	151	17	237		32		79.4
Female	18	166	44	15.9675	2852	9.2	146	20.7	244		52		74.3
Female	18	175	55	17.9592	3891	9.2	160	14.5	273		50		78.3
Female	18	160	45	17.5781	2940	9.2	156	17.4	185		44		77.5
Female	18	162	43	16.3847	3268	8.3	206	19.5	224		51		82.8
Female	18	170	50	17.301	3163	8.8	182	16	235		62		85.7
Female	19	172	55	18.5911	4093	9.5	179	21.9	257		30		79.5
Female	18	162	48	18.2899	3927	9.9	167	12.8	249		33		77.4
Female	18	158	48	19.2277	2826	9.1	198	17.2	261		53		79.2
Female	18	164	43	15.9875	3050	9	177	21	271		37		73.5
Female	19	160	46	17.9688	2864	10.2	145	26	254		35		72.8
Female	18	163	48	18.0662	3221	9	166	16	243		50		79.5
Male	19	181	75	22.8931	5160	7.3	235	21		249		6	76.9
Female	18	172	55	18.5911	3581	10.2	167	16.5	261		40		76.8
Female	19	165	53	19.4674	2852	9.1	145	15	256		41		72.6
Male	19	168	56	19.8413	3285	7.8	239	20		245		4	68.6
Female	19	172	65	21.9713	3093	9	181	22.3	251		40		79.4
Male	19	167	81	29.0437	4743	8.6	189	8.6		324		0	49.1
Female	19	172	65	21.9713	3197	10.4	131	10.6	259		23		63.6
Male	19	173	68	22.7204	4543	7	248	14.1		261		5	73.2
Female	19	161.5	51	19.5535	3568	8.4	187	8	214		44		84.6
Male	18	174	65	21.4692	5483	9.3	195	8		285		4	59.6
Male	18	170.5	68	23.3916	5358	7.1	238	8		203		17	87
Female	19	160	56	21.875	3574	9.1	172	22.9	242		36		82.2
Male	19	180	74	22.8395	5907	7.1	265	15.7		246		2	76.6
Male	18	176.5	80	25.6803	5561	8.5	185	12.4		284		0	58.4
Male	19	170	56	19.3772	4380	7	242	10.3		242		3	71.2
Female	18	167	55	19.721	3481	10.8	163	26.3	306		40		64.2
Female	19	151.5	47	20.4773	2514	10	168	21	255		53		75.6
Female	19	160	57	22.2656	3762	9.6	155	17.3	253		37		77.6
Male	19	168.5	77.5	27.2962	5225	7.6	223	13.2		238		0	70
Female	20	159.5	61.5	24.1743	3565	9.5	173	14.3	242		31		76
Male	19	173	59	19.7133	4216	7.1	273	29.5		259		5	76.5
Female	19	162.5	50.5	19.1243	3585	8.9	178	13.5	229		33		81.8
Female	19	162	48	18.2899	3231	9.6	170	19.5	247		30		76.6
Female	18	156	55	22.6003	3542	9	171	9.3	232		39		80.4
Female	18	155.5	47	19.4374	3168	8.3	173	12.3	246		42		79.5
Female	19	163.5	54.5	20.3874	3809	9	148	13	218		39		79.6
Male	19	177.5	79	25.0744	4062	7.3	230	14		254		2	66.6
Female	18	155	67	27.8876	3964	10	142	15	259		31		70.2
Female	18	157	73	29.6158	3655	10.7	110	10.5	275		35		55.4
Female	18	160	52.5	20.5078	3039	10	146	28.8	222		52		79.4
Female	18	160	59.5	23.2422	3488	9.6	168	21.5	242		44		79.3
Female	19	163	47	17.6898	3519	9.6	170	23.4	241		18		75
Female	18	162	54	20.5761	2693	9.9	163	3	246		45		69.2
Male	18	171.5	66.5	22.6096	3216	7.3	242	11.3		224		11	76.2
Female	19	165	44.5	16.3453	2765	8.2	186	12	217		50		79.4
Female	18	164	80	29.7442	3613	9.1	155	19.5	245		25		71.6
Female	17	169	67	23.4586	3531	9.6	180	20.4	252		29		78.8
Male	19	165	57	20.9366	4230	7.6	205	13.2		277		0	63.7
Female	18	155	52	21.6441	3811	8.8	160	16.5	217		35		82.8
Male	19	179.5	71	22.0358	5352	6.8	260	8.1		202		7	86.1
Female	18	162.5	51	19.3136	2708	9.2	155	16.5	216		35		77.7
Female	18	173	61	20.3816	4407	8.3	210	26	195		49		94.5
Female	18	171	53	18.1252	3400	9.1	150	20	232		11		72.6
Male	18	177	66	21.0667	4700	6.9	230	2		427		4	56.8
Female	18	163	54	20.3244	3400	7.9	210	17	420		10		64.6
Female	18	160	49	19.1406	3643	8.6	160	18	245		45		81.4
Female	18	161	46	17.7462	3331	8.7	185	8	246		34		78.7
Female	19	165	65	23.8751	3650	9.2	150	16	285		11		64.4
Female	19	164	54	20.0773	3400	9.6	205	7.5	246		45		80.7
Female	18	165	42	15.427	3100	9.6	175	19	247		43		74.4
Male	18	175	52	16.9796	3854	6.9	230	0		245		3	63.8
Female	18	159	45	17.7999	3202	9.6	170	17	247		30		76.2
Female	18	157	40	16.2278	2500	9.3	155	16	239		30		71.3
Male	18	179	65	20.2865	4990	7.8	200	12		241		0	68.3
Female	18	162	51	19.433	2900	10.2	165	18	247		32		73.9
Female	18	164	51.5	19.1478	3615	11.1	130	16	293		30		56.8
Female	18	166	48.5	17.6005	2988	9.5	150	15.5	236		33		74.1
Male	18	176	87	28.0863	5143	8.4	220	13.5		301		1	59.2
Female	18	169	58	20.3074	3400	9.6	145	16.5	242		31		75.6
Male	19	178	95	29.9836	4150	9.9	160	9.5		428		0	31.2
Female	19	160	55	21.4844	3600	10.2	165	13.5	259		34		75.8
Female	18	161	52.5	20.2538	3600	8.8	180	12	247		41		80.8
Male	19	180	66.5	20.5247	5060	7	210	4		381		7	62
Female	19	159	64	25.3155	3040	8.3	175	16	274		26		73
Female	18	160	58.5	22.8516	3600	10.9	155	14	266		30		68.2
Female	18	157	51	20.6905	3208	9.2	160	15.5	251		40		76.8
Male	18	183	74.5	22.2461	5740	7.3	245	0		303		8	65.4
Male	18	178	67	21.1463	3796	8	245	0		303		0	55.3
Male	19	183	88	26.2773	4953	8.4	185	11		437		0	47.5
Female	18	162	49.5	18.8615	3747	8.6	180	25	223		44		86.3
Female	19	160	51	19.9219	3500	9.3	150	12	245		40		77.2
Male	19	185	105	30.6793	5900	7.5	245	14		427		0	54.4
Female	17	170	76	26.2976	4675	11.3	145	14	279		27		56.2
Male	18	171	49	16.7573	3769	8.6	230	30		286		15	70.3
Male	17	175	65	21.2245	4460	7.7	225	19		258		4	69.4
Female	19	161	52	20.061	3600	11.3	150	28	244		25		66.4
Female	19	160	56	21.875	2570	10.1	150	18	246		20		67.7
Male	18	172	62	20.9573	3760	7.8	230	9		302		0	61.5
Female	18	161	56	21.6041	3382	9.7	170	16	287		37		72
Male	18	170	52	17.9931	3184	9.9	215	4		266		0	52.6
Female	18	167	48	17.2111	3445	9.5	175	15	244		43		80.4
Male	19	175	60	19.5918	2810	7.1	245	21		209		8	74.3
Male	18	175	80	26.1224	4550	8	220	16		268		1	65
Female	18	158	58	23.2335	3055	9	150	4	228		40		72.4
Male	19	178	53	16.7277	3383	7.9	235	4		302		8	59.2
Male	19	169	57	19.9573	4398	7.4	250	17		222		0	74
Male	18	178	84	26.5118	4505	8.2	200	20		303		0	58.1
Female	18	167	59	21.1553	3822	9.9	183	11	236		31		78.6
Female	18	159	42	16.6133	2556	9.1	170	14	246		34		72.1
Female	19	161	44	16.9747	1963	10	155	23	254		44		68.5
Male	21	180	71	21.9136	2556	7.9	225	28		224		11	71.2
Female	18	165	59	21.6713	3210	9.2	173	24	254		32		78.8
Female	19	163	52	19.5717	3546	10.1	170	25	248		31		79.5
Female	18	160	51	19.9219	2663	9.6	160	18	254		34		73.8
Male	19	163	58	21.83	4062	7.8	210	12		254		5	68
Male	19	179	57	17.7897	4793	8.2	220	17.5		252		2	66.3
Female	18	168	46	16.2982	2858	9.1	165	10	244		40		73
Female	18	152	49	21.2084	3156	9.9	162	19	245		46		77.2
Female	18	152	41	17.7458	2499	10	180	11	249		32		72.6
Female	18	153	49	20.9321	3303	10.1	150	9	247		35		73.1
Female	18	160	69	26.9531	3210	10.2	155	14	278		15		60.2
Female	18	156	59	24.2439	2973	11.5	140	10	261		38		53.3
Female	19	160	52	20.3125	2400	9.4	173	12	226		41		76
Female	19	168	52	18.424	3184	9.7	160	22	253		40		77
Female	20	169	61	21.3578	4304	10.1	170	16	241		27		76.6
Male	20	174	61	20.148	4082	7	240	19		216		17	84
Female	18	152	47	20.3428	3585	9.9	165	6	251		29		75.4
Male	18	170	56	19.3772	3751	8.5	250	23		336		2	59.7
Male	19	162	52	19.8141	3422	8.4	190	-4		302		0	45.8
Female	19	161	53	20.4467	2961	10.3	155	23	287		28		68.1
Female	19	159	50	19.7777	2725	9.5	160	23	240		49		78.2
Female	18	163	65	24.4646	3308	8.3	200	27	218		52		85.5
Female	18	167	55	19.721	3395	8.9	177	20	212		51		85.1
Male	19	169	67	23.4586	3074	7.2	230	13		222		12	75.1
Female	18	164	61	22.68	3284	9.2	180	28	249		40		81
Female	19	158	46	18.4265	2444	9.2	145	22	243		29		72.3
Male	18	180	66	20.3704	4412	7.3	210	11		285		8	69.6
Male	20	169	69	24.1588	3949	8.4	175	3		427		0	41.3
Male	19	171	62	21.2031	3847	8	205	17		232		5	68.8
Female	19	158	53	21.2306	3359	8.4	173	21	203		50		88.3
Female	19	163	46	17.3134	2745	9.1	170	11	236		46		77.1
Male	18	184	90	26.5832	5558	8.1	230	13		286		0	65.2
Male	18	175	69	22.5306	5313	7.6	237	15		235		0	74.6
Female	18	159	50	19.7777	2661	8.7	174	13	251		32		75.6
Female	18	163	54	20.3244	3348	8.5	150	11	222		48		79.7
Female	18	172	80	27.0416	4621	10.1	170	5	281		33		67.2
Female	19	165	70	25.7117	2731	9.5	150	21	284		32		66.8
Male	18	173	62	20.7157	4247	7.6	225	23		243		1	71.3
Female	19	167	54	19.3625	3228	9.9	145	15	255		33		71.5
Female	18	164	50	18.5901	3031	9.2	145	18	219		54		78.3
Female	19	157	50	20.2848	2462	8.6	164	11	253		45		75.2
Female	21	161	70	27.0051	3147	9	145	17	241		27		70.4
Male	18	160	52	20.3125	3180	7.1	210	17		237		10	74.6
Male	20	178	60	18.937	3789	7.1	245	14		221		6	74.7
Female	19	164	51	18.9619	2667	10.7	150	20	258		28		66.2
Female	18	159	46	18.1955	2793	9.5	170	18	242		47		77.1
Female	18	164	60	22.3081	3559	7.7	175	19	202		56		92.6
Female	18	165	78	28.6501	2564	10.6	160	12	285		40		56.3
Male	18	170	63	21.7993	4800	7.6	235	22		185		6	76.7
Male	18	170	65	22.4913	4213	6.8	260	20		226		3	78.3
Female	19	158	45	18.026	2567	9.7	147	18	222		26		73.5
Male	19	169	55	19.257	3791	7.9	210	25		241		2	70.3
Male	18	173	71	23.7228	6010	6.6	240	19		249		6	81.2
Male	18	170	68	23.5294	4446	7.4	217	21		251		5	71.7
Male	18	175	81	26.449	5054	7.8	175	-2.3		302		0	49.4
Female	18	155	45	18.7305	3082	8.8	178	29	226		54		84.7
Female	18	150	45	20	2340	9.1	151	12	249		27		72.1
Male	19	172	60	20.2812	4973	6.6	262	28.7		242		10	88.2
Female	18	170	60	20.7612	4247	8.8	190	8	243		42		79.1
Male	18	176	66	21.3068	4830	7.5	200	10		263		0	66.9
Female	18	165	50	18.3655	3413	8.2	165	26.4	242		30		83.6
Male	18	182	55	16.6043	4318	7.2	255	0		262		5	63.4
Female	18	167	60	21.5139	2034	8.8	151	15.2	245		31		72.6
Male	19	174	65	21.4692	4475	6.7	258	16		211		6	82.1
Female	19	165	52	19.1001	3064	8.7	160	32	232		36		81
Male	18	181	60	18.3145	4504	7.4	252	9.3		253		5	71.2
Female	18	172	68	22.9854	4416	8.6	185	8	214		25		81.4
Male	18	176	80	25.8264	5689	7.4	200	23.2		262		1	68.5
Female	20	146	45	21.1109	3027	8	160	12	245		39		78.6
Female	18	154	54	22.7694	2905	9.5	151	23.3	231		31		76.9
Female	18	166	54	19.5965	2247	9.3	160	7.4	249		50		73.9
Female	19	160	49	19.1406	3221	8.5	190	23	239		40		83
Female	18	163	51	19.1953	3310	9.4	155	25.3	252		22		75.4
Female	19	157	41	16.6335	2359	8.4	151	11	211		46		75.1
Female	18	163	53	19.9481	3953	9.1	160	14.5	239		38		80.2
Female	19	156	50	20.5457	2503	8.4	183	19.5	183		30		81.5
Female	19	157	52	21.0962	3440	8.9	140	19	228		45		79.2
Female	19	156	50	20.5457	3275	8	165	10	206		44		84
Female	17	156	40	16.4366	2973	8.7	151	20	183		35		77.7
Female	18	166	57	20.6852	3567	8.8	160	18.2	243		49		82.1
Male	21	170	60	20.7612	5477	7.6	200	20		226		1	72.9
Female	19	160	49	19.1406	2555	8.3	151	4.3	234		42		73.3
Male	19	170	60	20.7612	5595	7.3	225	21		244		6	76.9
Female	20	156	55	22.6003	2960	8.7	180	16	184		32		79.7
Female	18	172	67	22.6474	3188	9	178	17	245		39		72.8
Female	19	160	68	26.5625	2684	10	125	8.9	237		45		64.2
Male	19	169	63	22.0581	4401	7.8	224	14		241		14	77.6
Female	18	161	48	18.5178	2903	9.7	165	20.7	262		52		77
Female	19	162	44	16.7657	3413	10.4	150	9.3	244		30		69.2
Female	18	161	48	18.5178	2878	9.4	144	17.5	234		54		76.3
Female	18	166	46	16.6933	3415	10.6	137	10.5	259		45		65.6
Female	18	165	55	20.202	3301	9	183	18.5	236		55		83
Male	18	162	50	19.052	4439	7.8	242	11.3		238		6	72.4
Male	18	174	81	26.7539	5725	7.9	187	17.3		279		0	60.2
Female	19	157	40	16.2278	3264	9.5	150	16.9	237		47		73.8
Female	18	165	51	18.7328	2969	12	165	20	420		10		41.5
Male	18	182	77	23.246	4966	8.4	197	10.3		248		0	65.8
Female	18	164	75	27.8852	4069	9.4	186	15	212		38		80
Female	18	158	57	22.8329	1945	9.8	135	11	243		45		64.6
Male	19	183	77	22.9926	5062	7.6	253	14		236		6	77
Female	20	154	44	18.5529	2504	9.5	150	8.6	248		35		71.3
Male	18	177	70	22.3435	5560	7.8	203	15.3		251		5	71.6
Female	19	169	62	21.7079	3711	9.9	144	15.6	241		31		74.2
Male	18	178	55	17.3589	4024	8.3	170	13.6		274		9	59.1
Female	18	163	55	20.7008	3287	9.2	175	24.4	227		47		82.4
Female	18	155	44	18.3143	3220	10	120	14.5	226		42		70.5
Female	19	175	55	17.9592	3801	9.1	149	26.1	252		54		82.5
Female	18	168	58	20.5499	3064	9.2	156	14	235		46		77.2
Female	18	156	57.5	23.6275	2588	8.9	146	17	221		45		76.7
Male	18	164	59	21.9363	3556	7.4	236	11.3		254		12	74.5
Female	19	158	40	16.0231	2183	9.4	155	23.1	241		36		70.7
Female	19	160	57	22.2656	3691	9.2	163	34	247		47		82.8
Female	18	159	44	17.4044	2542	8.7	138	27.2	232		42		76.5
Male	18	164	52	19.3337	4399	8.1	220	12		247		1	68.6
Female	17	164	52	19.3337	3896	8.8	196	24.3	231		40		85.9
Female	19	152	43	18.6115	2688	10.6	157	24.5	281		49		68.2
Male	19	169	60	21.0077	4651	7.5	232	14		242		7	75
Male	19	172	52.5	17.7461	4898	9	207	13.8		234		5	65.7
Female	21	160	54	21.0938	3469	8.5	207	18	184		28		85.6
Female	19	165	48	17.6309	2890	8.2	195	10	225		57		83.6
Female	18	168	56	19.8413	3670	9.5	182	19	229		52		84.2
Female	18	161	56	21.6041	3107	9.7	174	22	281		42		73.7
Male	18	174	81	26.7539	5399	7.5	215	13		239		0	70
Female	18	163	57	21.4536	3028	8.6	152	15	242		36		75.2
Female	18	160	53	20.7031	2827	9.7	146	19	261		32		72
Female	18	158	53	21.2306	2545	8.9	162	14	258		41		74.7
Female	18	153	47	20.0777	2302	9.4	146	22	243		32		73
Male	19	171	70	23.939	4481	7	224	17		255		0	71.8
Female	19	162	54	20.5761	2980	8.1	168	16	233		52		81.3
Female	19	160	55	21.4844	3412	7.9	202	22	232		55		89.7
Female	18	159	45	17.7999	2946	8.6	194	24	185		46		83.1
Female	18	171	59	20.1771	3697	8.9	172	27	231		50		85.9
Female	18	157	51	20.6905	3011	8.8	142	12	252		35		73
Male	18	173	55	18.3768	4439	6.8	240	13		219		30	96.8
Female	20	167	60	21.5139	3549	9.1	140	27	279		11		67.4
Female	18	156	45	18.4911	3076	8.6	160	14	256		41		76.6
Male	18	182	52	15.6986	5400	7.4	228	2		242		0	66
Male	18	171	59	20.1771	4020	7.2	214	10		227		0	70.3
Female	18	154	44	18.5529	2033	9.2	164	18	238		24		72.4
Female	18	160	40	15.625	2946	9.5	165	18	241		43		73.9
Female	18	152	54	23.3726	2927	8.5	180	13	231		41		79.7
Male	18	182	79	23.8498	4945	7.7	225	33		256		5	75
Female	18	164	51	18.9619	3373	7.9	185	13	213		27		84.3
Female	19	159	53	20.9644	1989	9.2	144	20	241		31		68.5
Female	19	175	67	21.8776	4189	8.2	208	16	233		45		86.4
Female	19	169	53	18.5568	4639	7.9	194	16	233		51		86.6
Female	18	155	49	20.3954	3482	9.5	164	23	249		39		80.6
Female	19	148	47	21.4573	2229	9.2	126	12	274		34		65.2
Male	19	178	88	27.7743	5149	6.8	195	10		231		0	71
Female	18	156	54	22.1893	2257	10.1	152	16	277		15		60.4
Female	19	169	59	20.6575	2234	8.8	176	8	244		43		70.8
Female	18	165	52	19.1001	2485	8	188	19	277		40		76.1
Female	18	160	54	21.0938	2436	10.2	154	23	243		47		74.8
Female	19	160	57	22.2656	3945	8.8	165	26.6	239		49		84.9
Male	19	180	88	27.1605	5741	7.4	240	6.4		244		2	70
Male	18	177	62	19.79	5150	6.5	245	12		238		12	86
Female	18	166	60	21.7738	3003	10.3	120	14	269		32		65.2
Female	19	157	47	19.0677	2617	9.6	155	14.5	266		29		71
Male	18	181	79	24.114	5378	7.3	230	13.7		231		4	72.2
Female	19	156	54	22.1893	3069	8.3	185	30	201		48		88
Female	18	154	44	18.5529	2759	9	155	15.2	233		41		76.7
Female	18	170	49	16.955	2704	9.9	178	12	242		34		70.1
Male	18	175	69	22.5306	5203	7.5	197	4.6		271		0	66.2
Female	18	167	53	19.0039	2928	9.3	170	12.4	235		35		76.3
Female	18	154	48	20.2395	3585	8.4	175	18	217		40		85.4
Male	18	187	104	29.7406	6845	8.1	198	24.7		304		0	59.5
Female	19	158	45	18.026	3057	8.8	175	13.2	221		42		80
Female	18	158	51	20.4294	1978	9.4	148	20	184		33		71.7
Female	18	166	46	16.6933	3736	8.7	175	16.3	237		37		79
Female	19	168	50	17.7154	3004	9.9	140	15	229		37		72.6
Female	18	154	44	18.5529	3840	8.3	158	29.6	207		43		88
Female	18	152	44	19.0443	3369	9.8	158	23	252		42		78.6
Female	18	152	43	18.6115	2533	9.1	165	25.5	224		57		82.2
Female	19	154	60	25.2994	3080	8.4	175	25.2	248		45		78.5
Female	18	155	42	17.4818	2450	8.5	169	9.2	242		45		76.6
Female	18	160	51	19.9219	2422	9.6	135	9.6	238		26		67.6
Female	19	163	50	18.8189	3645	8.2	175	17.5	204		46		88.2
Female	19	165	48	17.6309	3080	9.6	150	18	271		48		73
Female	18	165	50	18.3655	3081	9.1	165	14.6	229		40		78.4
Male	18	180	61	18.8272	4993	7.5	220	13.2		237		2	73.1
Female	19	154	43	18.1312	3150	8.8	183	16	235		44		80.5
Female	18	155	42	17.4818	2931	8.6	160	23	207		61		87.5
Female	19	158	45	18.026	3224	7.9	195	12	225		51		84.6
Female	19	156	46	18.902	3222	8.4	175	20	183		52		86
Male	18	175	58	18.9388	4700	7.3	210	14		274		5	67.8
Female	18	167	56	20.0796	4091	9.1	185	14	274		45		79.4
Female	18	163	60	22.5827	3554	9.2	180	13	237		45		81.4
Female	18	163	47	17.6898	3681	8.9	175	21	203		53		88.9
Female	18	168	60	21.2585	3292	9.6	140	29	420		34		60.8
Female	19	165	47	17.2635	3470	7.9	200	18	204		43		90.4
Male	19	173	52	17.3745	3604	7.8	200	5		244		0	56.6
Female	19	163	64	24.0882	3592	9.8	150	20	275		39		70
Female	18	151	42	18.4202	3231	9.2	170	27	238		41		81.1
Female	19	158	50	20.0288	3109	8.3	180	14	240		49		80.9
Female	18	170	64	22.1453	3978	8.6	190	22	184		40		85.6
Female	18	165	55	20.202	4450	8.5	175	22	213		40		86.1
Male	18	176	83.5	26.9564	5499	8.6	205	18		278		0	62.8
Female	18	157	48	19.4734	2828	8.7	175	20	241		35		78.4
Male	19	178	73	23.04	5354	8.1	200	15		256		0	68.8
Male	19	175	60	19.5918	5215	8	205	17		279		1	66.8
Female	19	170	59	20.4152	3580	8.8	160	12	229		51		82.3
Male	19	172	55	18.5911	4892	7.6	210	23		224		14	81.5
Female	19	167	65	23.3067	3056	8.5	185	16	239		55		82.3
Female	19	158	53	21.2306	3578	9.4	170	29	207		44		86.6
Female	19	163	50	18.8189	2413	9.5	165	19	273		49		74.1
Female	19	160	48	18.75	3143	9.4	150	15	235		53		76.6
Female	19	162	65.5	24.9581	3905	9.1	175	26	221		36		82
Female	18	160	55	21.4844	3743	9.1	145	14	273		30		74
Female	18	162	46	17.5278	3154	8	195	15	224		34		83.8
Female	18	162	46	17.5278	3236	9.8	165	12	209		56		82.1
Female	18	150	43	19.1111	2522	9.4	150	27	216		30		77.5
Male	18	178	60	18.937	5232	7.6	245	7		244		4	73
Female	18	160	53	20.7031	3129	8	195	21	182		40		87.9
Female	18	175	73	23.8367	3523	8.8	170	22	254		43		81.7
Female	19	155	48	19.9792	1890	9	175	17	185		48		72.3
Female	18	168	54	19.1327	3837	8.9	170	15	257		39		79.6
Female	19	163	56	21.0772	3955	12	163	12	232		47		66.8
Female	18	168	54	19.1327	3746	9.5	185	19	237		45		82.2
Female	18	164	50	18.5901	3090	8.6	185	20	185		36		80.4
Male	19	175	53	17.3061	3405	6.8	235	16		217		11	77.8
Female	19	168	53	18.7783	3485	8.4	160	15	228		44		82.8
Male	18	187	69	19.7318	5317	6.6	250	12		226		2	80.6
Female	18	161	49	18.9036	3697	8.4	175	16	237		56		85.4
Female	18	160	60	23.4375	3329	8.7	140	2	221		29		69.9
Male	19	176	72	23.2438	5092	7	213	10		257		1	73.2
Female	18	168	52	18.424	3065	9	163	19	257		35		76.2
Female	18	165	60	22.0386	4149	8.4	195	16	203		48		89
Male	19	180	60	18.5185	4111	7.8	195	10		240		8	69
Female	18	157	52	21.0962	3283	8.4	160	6	252		43		77.2
Female	19	157	58	23.5304	3652	9.3	160	10	232		33		79
Female	18	158	47	18.8271	2422	8.4	157	12	235		37		75.8
Female	18	160	50	19.5312	3616	9	177	18	221		43		83.4
Female	19	168	50	17.7154	3415	8.9	193	22	201		48		88.8
Male	19	183	66	19.708	5429	6.5	280	18		221		2	84
Female	19	176	58	18.7242	2806	9	185	26	218		31		81.2
Female	18	162	62	23.6244	3550	8	205	20	216		49		90
Female	18	165	62	22.7732	3821	8.4	173	20	274		49		81.5
Female	18	161	47	18.132	3404	9.5	155	16	245		32		77.8
Female	19	166	50	18.1449	3583	8.7	180	27	224		46		87
Female	19	163	63	23.7118	3290	8.1	200	18	226		23		80.1
Female	19	160	54	21.0938	3423	9.1	135	18	235		38		76.2
Female	19	154	49	20.6612	3034	8.2	163	23	239		46		81.6
Male	18	174	58	19.1571	5196	7.3	220	16		229		2	75
Male	20	165	72	26.4463	4283	7.5	210	9		241		3	65.1
Female	19	168	57	20.1956	3160	8.7	155	13	219		21		75.2
Female	18	160	42	16.4062	2214	8.9	152	10	202		53		77
Male	19	169	85	29.7609	5519	7.8	205	14		277		6	62.8
Female	19	167	53	19.0039	3315	9.1	192	20	185		49		83.1
Female	19	159	55	21.7555	4300	13.2	155	22	293		51		61.2
Female	18	163	54	20.3244	5832	8.1	181	18	229		51		85.9
Female	18	163	52	19.5717	3400	8.7	205	19	239		47		85.5
Female	18	161	44	16.9747	3080	8.3	157	10	243		33		74
Female	19	174	55	18.1662	3652	9.4	168	10	246		39		78.4
Male	20	183	61	18.2149	4990	6.7	270	11		218		11	88.2
Female	18	160	48	18.75	2905	9.6	150	16	266		35		71.5
Female	18	168	51	18.0697	3737	8.8	182	23	216		50		87.3
Female	18	163	47	17.6898	3340	9.2	180	27	214		44		85.1
Female	18	163	62	23.3355	7326	9.7	151	10	267		44		76
Female	19	164	47	17.4747	3063	9.3	155	4	251		40		71.2
Female	18	155	42	17.4818	3772	10.2	153	22	265		36		75.9
Female	19	173	64	21.3839	3321	10.1	168	26	241		47		80.3
Female	19	162	51	19.433	2904	9.6	182	32	247		49		80.4
Male	19	179	75	23.4075	5690	8.1	235	12		238		1	72.6
Female	19	158	49	19.6283	3403	13	160	25	257		36		66.3
Female	20	156	51	20.9566	2738	9.5	155	1	328		47		53.9
Male	18	174	103	34.0203	4456	8.6	182	5		316		0	45.8
Female	19	154	46	19.3962	3075	9.8	170	25	227		57		82.1
Female	18	164	60	22.3081	3368	9.2	177	11	259		43		78.3
Male	18	167	61	21.8724	4860	8	180	6		243		18	72.2
Female	18	155	51	21.2279	3228	9.5	155	3	262		31		68.8
Female	18	158	55	22.0317	3633	9.2	153	15	218		37		80.2
Female	19	168	58	20.5499	3223	9.1	169	14	257		49		78.3
Female	18	162	55	20.9572	3192	8.6	188	12	199		38		84.5
Male	19	177	70	22.3435	4860	8.5	205	19		246		0	68.7
Female	18	161	50	19.2894	2963	9.9	190	18	252		33		76
Female	19	159	48	18.9866	3154	8.7	175	14	185		34		79.8
Male	18	177	62	19.79	4837	7.1	250	13		233		10	80.5
Female	19	153	43	18.369	3015	9.3	165	26.5	185		43		80.6
Male	20	165	57	20.9366	4271	7.2	240	18		223		7	76.5
Female	19	165	52	19.1001	3026	9.3	153	12.8	235		43		76.4
Female	19	160	52	20.3125	3207	8.8	153	22.5	238		45		80.1
Male	18	173	61.5	20.5486	4333	8.4	203	11.6		272		0	64.2
Female	18	152	57	24.6711	2114	9.3	140	21.2	251		30		66.8
Female	18	161	42	16.2031	3212	9.3	182	21.3	238		40		77.5
Female	19	160	50	19.5312	3500	10.9	173	22.7	228		34		74.8
Female	19	165	53	19.4674	3386	9.1	163	27	185		40		83
Female	18	165	51	18.7328	3405	10.3	145	23.1	266		36		74.4
Female	18	164	51	18.9619	3163	9	185	26.5	274		40		79.5
Female	18	154	60	25.2994	3901	8.8	161	17.7	235		46		79
Female	19	160	48	18.75	3412	9.9	146	19.1	241		38		76.6
Female	19	161	51	19.6752	3697	8.4	210	26.4	211		58		93.6
Female	18	165	55	20.202	3329	9.3	155	11	242		34		76.5
Female	19	166	51	18.5078	3225	9.6	147	8.4	254		36		72.8
Female	19	161	50	19.2894	3637	8.9	168	22	233		20		78.5
Male	19	174	49	16.1844	4717	7.5	245	8.9		234		14	76.8
Female	19	166	63	22.8625	3888	9.8	158	15.8	245		39		71.8
Female	18	166	60	21.7738	3444	9.5	158	21	221		43		82.1
Female	19	166	55	19.9594	4713	9.2	173	14.1	225		50		82.7
Female	19	152	47	20.3428	3219	8.3	169	20.2	224		47		83
Female	18	164	48	17.8465	3136	9.6	163	5.8	243		31		72.8
Female	18	160	49	19.1406	2819	10.4	150	16	252		26		68.4
Female	19	162	52	19.8141	2292	10	145	16.2	185		34		70.4
Female	18	157	44	17.8506	2586	9.2	149	17.2	241		48		73.7
Female	19	164	70	26.0262	4082	10.6	147	0	291		31		54.4
Female	18	167	65	23.3067	3605	9	151	12.1	286		27		71.2
Male	19	170	57	19.7232	2709	6.5	263	23		197		9	82.5
Male	19	178	62	19.5682	4788	6.9	262	14		223		12	84
Female	20	163	55	20.7008	3069	8.5	180	17.5	218		36		81
Male	19	180	80	24.6914	5339	6.9	230	12		240		1	73.4
Female	19	168	57	20.1956	3449	8.9	175	14	245		40		81
Female	19	163	52	19.5717	4098	9.1	140	26	244		40		79.2
Female	18	150	54	24	3420	9.9	140	24	275		37		69.3
Female	18	161	50	19.2894	3612	9.7	140	4	249		44		71
Female	19	163	47	17.6898	3327	9	175	12	247		27		77.3
Female	19	164	59	21.9363	2459	10	110	25	253		35		67.5
Female	18	160	46	17.9688	3247	11.6	150	17	243		28		58.6
Female	19	160	56	21.875	3516	9.5	140	13	258		48		74.8
Female	19	157	50	20.2848	3241	9.7	158	15	256		32		74.4
Female	18	167	48	17.2111	3684	9.8	180	17	243		37		77.2
Female	18	170	51	17.6471	3534	10.1	100	21	265		46		71.3
Male	18	167	53	19.0039	3794	7.6	100	21		241		9	68.2
Female	18	160	45	17.5781	3209	8.7	165	17	203		33		83
Male	18	177	62	19.79	5005	7.1	230	9		182		3	81.8
Male	18	170	78	26.9896	5290	7.3	225	20		185		5	81.9
Female	19	170	106	36.6782	4227	9.8	170	2	285		24		58
Female	18	150	46	20.4444	2935	9.8	140	25	247		45		73.8
Female	18	158	80	32.0461	3282	10.5	148	25	261		24		64
Female	20	161	43	16.5889	3924	8.8	180	27	223		56		85.6
Female	19	163	45	16.937	3124	8.9	180	21	231		39		77.5
Female	18	162	52	19.8141	2586	9.8	160	23	248		30		74.3
Female	19	159	47	18.591	3560	7.9	210	25	182		34		92.3
Male	19	170	51	17.6471	3917	7.4	235	13		183		8	79.4
Female	18	161	55	21.2183	3567	10.3	150	20	276		27		71
Female	19	165	46	16.8962	3089	9.5	150	-1	285		56		60.6
Female	18	170	65	22.4913	3867	9.4	155	13	272		35		75.6
Female	18	163	66	24.841	3695	10.4	174	17	252		41		73
Female	19	150	40	17.7778	2344	8.1	190	19	231		34		79.4
Female	18	167	47	16.8525	3328	9.7	130	23.5	253		57		72.3
Female	19	165	55	20.202	2929	9.4	165	10.3	224		36		76.7
Female	19	173	65	21.7181	3453	9.8	150	15.8	251		37		75.8
Female	18	160	49	19.1406	3898	8.3	195	17.5	222		60		90.6
Female	18	167	54	19.3625	2103	8.8	180	14.2	237		52		77.9
Female	18	169	49	17.1563	3055	8.4	190	18.5	240		44		81.1
Female	18	174	62	20.4783	3901	8.8	150	5.7	244		34		76
Female	18	166	51	18.5078	3797	9	185	16.9	223		41		83.4
Female	18	163	49	18.4425	2900	9.6	185	6.6	218		39		77.1
Female	18	160	44	17.1875	2619	9.2	170	13	231		47		77.2
Male	18	187	65	18.5879	4687	7.2	195	4.3		246		10	72.3
Female	18	161	48	18.5178	2519	9.2	185	15.2	254		32		75.1
Female	18	155	44	18.3143	3026	9.6	170	8.5	246		42		75.2
Male	18	184	87	25.6971	5143	7.5	240	11.7		263		0	69.2
Female	19	170	60	20.7612	3783	8.9	150	17.1	248		30		77.8
Female	19	152	62	26.8352	2581	8.9	185	3.4	278		30		63.7
Female	18	166	62	22.4996	3502	9.2	170	20.3	294		31		73.6
Male	19	173	65	21.7181	4554	8.4	195	9.5		262		0	63.5
Female	18	167	70	25.0995	4291	8.3	200	17.5	259		35		79.6
Female	18	168	56	19.8413	2769	10.3	175	3.3	247		40		69.1
Female	19	171	51	17.4413	3500	9	170	10	241		42		80.2
Female	18	171	57	19.4932	3701	8.7	175	13	246		40		81.2
Female	18	160	53	20.7031	3387	9.8	160	7.4	281		31		71.3
Female	18	165	63	23.1405	3600	10	135	13.4	255		30		71
Female	19	152	50	21.6413	2587	9.2	145	14.1	252		34		71.1
Female	19	175	62	20.2449	3165	9.4	195	4.8	226		39		77.2
Male	18	184	60	17.7221	4078	6.8	255	13.9		240		10	78.2
Female	19	158	43	17.2248	3130	10	140	2.8	254		45		65.8
Female	18	165	50	18.3655	2898	8.9	175	17	242		40		78.2
Male	19	181	84	25.6402	4729	6.3	250	12.5		235		0	74.8
Male	17	174	55	18.1662	4126	7.3	245	10		238		10	77
Female	18	155	48	19.9792	2895	10.1	145	15.1	262		30		69.4
Male	19	175	55	17.9592	4839	7.2	245	16.3		241		10	80.1
Male	18	177	75	23.9395	4023	7	230	-2.5		251		2	63.7
Female	19	158	42	16.8242	3044	10.1	161	23.3	255		54		74.7
Male	19	170	62	21.4533	4471	7	230	8.1		243		8	75.6
Female	18	168	40	14.1723	3821	7.9	191	11.5	241		35		79.7
Female	19	170	55	19.0311	4128	9.1	155	14.5	185		40		80.4
Female	19	165	49	17.9982	3356	8.7	160	18.5	232		56		84
Female	19	165	49	17.9982	2409	10	170	8.1	243		37		72.4
Female	18	165	52	19.1001	3465	8.7	185	19	217		47		86.2
Female	18	163	46	17.3134	3164	9.7	150	10.2	277		43		70.2
Female	19	161	52	20.061	3058	9.2	155	25	251		27		76.3
Male	19	174	66	21.7994	5249	7	240	25.5		185		7	82.8
Female	18	165	45	16.5289	3431	10.2	173	24.5	276		38		73.1
Female	17	159	40	15.8222	2615	9.1	170	12.5	261		40		71.6
Female	18	169	56	19.6072	3279	9.2	175	24.1	243		28		79.5
Female	18	158	50	20.0288	3601	9.2	160	23.3	255		39		80
Female	18	165	49	17.9982	3403	8.7	170	25.5	237		29		82.9
Female	18	165	48	17.6309	2821	9.6	160	3	219		36		71.2
Female	18	174	54	17.8359	4063	8.7	171	21.3	268		17		74.3
Male	18	173	50	16.7062	3614	7.7	222	3.7		253		10	68.8
Female	18	169	41	14.3552	2295	9.5	168	24.3	265		43		71.7
Female	18	160	48	18.75	2974	9	160	19.2	255		40		76.3
Female	19	160	40	15.625	1612	9.5	185	7.5	251		43		61
Female	19	165	60	22.0386	3684	9.6	163	18.6	252		30		77.8
Female	18	158	60	24.0346	3436	10.7	170	3.5	277		37		61.2
Female	18	163	62	23.3355	3483	9.2	195	27	238		36		84.8
Female	18	170	60	20.7612	3567	10.3	161	25.5	244		40		75.5
Female	19	160	53	20.7031	3925	9.2	185	10.6	235		11		73.4
Female	18	166	56	20.3223	3550	8.3	182	27.5	231		45		87
Female	17	160	46	17.9688	3041	9.2	185	24.5	246		50		81
Male	19	175	62	20.2449	4957	7.4	221	16.2		253		1	71.9
Female	19	160	46	17.9688	2739	9.2	165	26.1	263		22		73.7
Female	18	165	49	17.9982	3127	10.3	180	21	240		42		77.3
Female	18	160	48	18.75	2953	9.3	165	14	287		39		69.9
Male	19	170	55	19.0311	3898	7.4	205	16		242		11	74.4
Female	19	151	40	17.5431	3972	10.2	145	17.3	244		41		75.4
Male	18	184	66	19.4943	4942	6.4	245	-9.5		242		2	71.5
Male	18	183	60	17.9163	4387	7.2	175	1.5		294		3	53.6
Female	18	166	54	19.5965	3256	11	130	22.4	277		37		58.8
Female	18	161	54	20.8325	3088	8.7	183	26	242		25		78
Male	19	172	48	16.225	3972	7.3	235	23		183		8	75.9
Female	19	171	65	22.2291	3047	9.1	168	11.6	258		45		76.2
Female	18	170	49	16.955	3972	9	179	15.8	242		30		77.4
Female	19	158	80	32.0461	2293	10.6	150	11.6	303		35		51.2
Female	19	160	54	21.0938	3464	11.2	119	7.1	254		33		58.2
Female	18	158	53	21.2306	1840	11	155	14	246		43		57
Female	18	170	54	18.6851	3742	8.4	188	16	236		52		85.3
Female	18	163	65	24.4646	3541	9.5	156	14.6	235		31		75.2
Female	18	162	46	17.5278	2387	9.2	167	7	282		30		68.3
Female	19	165	49	17.9982	3527	10.2	149	16.7	269		41		74.4
Male	18	171	73	24.9649	3855	7.9	200	7		271		2	59.6
Female	19	155	48	19.9792	2540	9.7	140	9.3	241		45		70.3
Female	19	161	42.5	16.396	1806	10.3	153	12.5	281		34		55.3
Female	18	166	53	19.2336	3176	10.2	163	15	254		51		75.8
Female	20	155	54	22.4766	2760	8.4	168	14.4	241		41		77.7
Female	18	160	80	31.25	3528	9.7	160	6.4	265		26		68.2
Female	18	165	44	16.1616	2282	8.4	180	16.3	286		44		68.2
Female	20	163	44	16.5607	3633	10.3	165	15	182		47		80
Female	18	158	51	20.4294	3355	8.5	180	13.6	218		44		83.5
Female	18	160	45	17.5781	3890	7.9	203	17.5	241		38		85.7
Female	18	160	50	19.5312	5408	10.4	160	11.6	266		25		70.8
Female	19	159	42	16.6133	3174	10.6	160	25	255		28		68.3
Female	18	161	51	19.6752	3656	10.8	150	11.7	253		26		67.4
Female	18	168	47	16.6525	2807	9.1	175	21.9	249		28		74.1
Female	19	168	57	20.1956	3796	8.6	200	13.5	229		42		84.4
Female	18	166	57.3	20.794	4146	9.5	180	26	236		33		82.8
Female	19	168	58	20.5499	3168	9.2	145	16.5	237		47		76.2
Female	19	174	53	17.5056	2744	9.6	163	13	234		37		75.3
Female	18	159	65.5	25.9088	4207	9.9	150	-3	259		33		64.6
Female	19	165	59	21.6713	3719	10.4	141	23.2	277		30		69.4
Male	21	165	50	18.3655	3371	8.2	221	1.2		332		10	59.8
Male	18	182	74	22.3403	4460	6.7	269	6.7		217		10	84.9
Female	18	160	46	17.9688	2807	9.1	176	19.5	236		37		78.2
Female	18	170	47	16.263	3816	9.6	200	19	253		32		77.4
Male	18	171	59	20.1771	3351	6.7	210	1		303		10	65.6
Female	18	161	56	21.6041	3330	9.5	165	26	251		36		79.5
Female	18	164	49	18.2183	3916	8.4	185	23	232		34		84.6
Female	18	160	53	20.7031	3565	9	170	25.2	240		35		82.3
Female	18	161	55.5	21.4112	3207	9.8	150	16.2	323		27		60.9
Male	18	182	76	22.9441	5311	7.8	208	2.1		272		0	66.4
Female	18	159	43	17.0088	3646	10.5	150	21.3	329		31		56.9
Male	18	179	71	22.1591	4736	8.1	219	7.1		303		2	60.5
Female	19	169	49	17.1563	3477	9.9	155	-7	258		40		69.6
Female	19	160	52	20.3125	2793	9.5	161	24.5	255		33		75.6
Female	19	162	48	18.2899	3594	9.8	153	25.5	242		27		77.1
Female	18	161	45	17.3604	2753	9.6	158	7.8	329		26		57.9
Female	19	155	48	19.9792	2355	9.6	165	12.7	259		33		71.7
Female	18	166	59	21.4109	4043	8.8	171	20.5	184		50		84.5
Female	18	155	46	19.1467	3522	8.8	145	14.5	234		43		78.8
Female	19	158	44	17.6254	3118	9.4	152	7.4	279		43		70.4
Female	18	151	41	17.9817	2560	9.2	172	14	223		33		76.7
Male	19	179	63	19.6623	4377	8.2	220	3.9		326		0	59.2
Female	19	155	41	17.0656	3072	9.1	169	22.2	228		30		76.6
Female	19	168	55	19.487	2817	9.2	170	24.5	236		27		77.9
Female	19	170	50	17.301	3928	8.9	155	5.5	272		30		74.4
Female	19	166	47	17.0562	2255	9.2	146	11.8	226		55		72.5
Female	18	158	55	22.0317	3010	9.2	180	21.4	233		38		79.7
Male	18	171	50	17.0993	4117	7.7	215	3		261		9	67.2
Female	18	161	46	17.7462	4516	9.6	170	29	246		33		81
Female	19	166	57	20.6852	2985	9.7	135	12	256		36		68.9
Female	18	166	60	21.7738	3641	11.4	148	17.5	253		24		61.2
Female	18	158	52	20.83	3668	9	180	26.2	217		47		87.2
Female	19	160	60	23.4375	3695	10.4	140	13.5	263		28		69
Female	18	164	50	18.5901	3530	9.3	182	19.9	262		40		80.2
Female	19	156	48	19.7239	2130	10.1	150	18.4	247		38		70.7
Female	19	164	53	19.7055	3545	8.8	151	18	219		41		82
Male	19	165	58	21.3039	3743	8	198	-11		300		6	53.5
Female	18	170	62	21.4533	3568	10	171	21	245		34		78.9
Female	18	157	41	16.6335	2025	10	140	13.2	274		5		55.4
Male	18	183	60	17.9163	4463	8	210	-5		252		3	60.6
Female	18	162	46	17.5278	2852	11.6	100	17	271		26		52
Female	18	156	65	26.7094	3469	9.7	111	24	267		35		68.9
Female	18	160	42	16.4062	3141	9.6	176	15	238		34		73.6
Female	18	170	53	18.3391	2950	9.1	130	15.2	252		25		68.1
Female	18	171	58	19.8352	2550	9.6	175	26	254		37		76.9
Female	18	165	66	24.2424	3349	9.9	155	18.2	254		34		72.7
Female	19	165	55	20.202	4511	9.8	135	22	221		44		77.1
Male	18	175	51	16.6531	4021	7	233	14		241		9	73.3
Male	18	171	55	18.8092	4027	8	207	11.8		256		6	67.3
Female	18	156	41	16.8475	2437	9.5	150	13	240		37		69.2
Male	18	166	58	21.048	4404	6.6	230	14		268		6	75.4
Female	18	164	74	27.5134	3880	10.4	146	20	259		25		68.2
Female	18	169	47.5	16.6311	3472	8.9	170	18.1	243		26		77.2
Female	21	156	50	20.5457	1750	10	151	23.1	251		24		61
Female	20	170	54	18.6851	2520	8.6	155	16	251		24		72.9
Female	21	159	56	22.151	3121	9.2	150	18.3	251		37		74.4
Female	18	162	51	19.433	3296	9.5	135	21	247		42		73.5
Female	19	162	46	17.5278	2821	8.5	195	5	211		56		82
Female	19	162	48	18.2899	1982	9.9	149	17	223		44		71.7
Female	19	177	62	19.79	2722	9	178	10.8	184		44		78.7
Female	18	160	52	20.3125	2570	10.5	135	19	243		40		64.9
Female	18	162	45	17.1468	3038	10.7	152	17.2	241		40		66.6
Female	18	172	74	25.0135	3237	9.7	180	6	262		36		71.5
Male	18	168	53	18.7783	3854	6.8	229	14.5		236		16	82.5
Female	18	166	60	21.7738	3594	9.4	143	13	255		42		75.4
Male	18	173	53	17.7086	4049	7.5	233	16.5		427		13	60.5
Female	18	155	57	23.7253	2352	11.1	124	5.8	222		43		57.5
Female	18	171	46	15.7313	3859	8.5	193	13.3	185		26		79.3
Female	18	160	47	18.3594	3552	9.1	164	8.2	240		36		78.8
Female	19	162	78	29.7211	3214	9.6	134	13	245		16		59
Female	19	169	60	21.0077	2719	9	178	21.8	209		17		75.8
Male	18	189	67	18.7565	5464	7.1	276	10		261		5	76.6
Female	19	160	52	20.3125	3871	9.4	157	14.5	234		30		78.8
Female	18	165	56	20.5693	3913	8.5	158	23	205		50		87.5
Male	18	178	72	22.7244	5416	7.1	248	19.8		259		5	76.3
Male	19	173	58	19.3792	3917	7.9	208	10.5		256		7	69.2
Female	19	165	58	21.3039	3161	9.3	156	25.2	246		33		78
Female	18	157	36	14.6051	2620	9.3	164	23	223		31		75
Female	19	164	63	23.4236	2922	10.8	133	11	296		38		54.5
Female	18	175	51	16.6531	3579	9.1	165	13.4	253		34		75.6
Female	18	162	49	18.6709	2967	9.5	148	19.3	241		36		74.7
Male	18	178	55	17.3589	4499	7.1	240	13.2		236		13	76.8
Female	18	172	55	18.5911	2904	9.7	162	14.2	214		38		77.9
Female	19	167	50	17.9282	3400	9.2	171	14.5	243		55		82.3
Female	20	165	50	18.3655	3390	8.5	187	24.9	223		48		86.3
Female	18	161	48	18.5178	2898	9.6	165	22.5	236		50		78.7
Female	18	162	62	23.6244	2927	10.5	140	18.2	264		26		66.3
Female	19	152	50	21.6413	2711	9.3	150	21	226		17		70.2
Female	19	158	52	20.83	3551	10.3	180	15	244		41		78.8
Male	18	170	70	24.2215	4730	8.3	230	16		276		0	63
Female	18	165	48	17.6309	3118	8.9	148	21	233		37		77.5
Female	18	158	47	18.8271	2467	10.1	160	22	248		32		73.3
Female	18	157	47	19.0677	2759	9	154	22	222		40		78.6
Female	18	160	43	16.7969	2098	10.5	150	3	271		44		57.8
Female	18	163	65	24.4646	3530	9.8	160	12	277		49		71.7
Female	18	165	57	20.9366	3640	8.8	177	19	227		51		84.5
Female	19	160	50	19.5312	2580	8.8	185	21	247		46		78.8
Female	18	165	64	23.5078	3455	8.5	165	14	226		44		83
Female	18	162	57	21.7193	2966	9.9	185	10	245		39		75.3
Female	19	172	85	28.7317	4108	9.4	170	11	242		30		70.6
Male	19	171	46	15.7313	3592	7.3	245	6		231		0	67
Female	18	169	59	20.6575	3552	9.3	192	20	213		59		88.5
Female	19	158	53	21.2306	3557	9	190	21	262		41		81.6
Female	19	155	63	26.2227	3065	10	168	20	243		25		68.4
Female	18	164	57	21.1927	4078	8.6	188	24	223		48		87.2
Female	18	158	50	20.0288	3660	8.7	160	15	224		51		83.5
Female	18	160	53	20.7031	3166	9.8	170	24	209		59		86.3
Female	18	158	50	20.0288	2185	9.4	130	16	267		29		64.9
Female	18	153	48	20.5049	2499	10.3	145	14	228		34		70.8
Male	18	174	57	18.8268	4850	7.6	210	4		243		0	69.3
Male	19	177	70	22.3435	4376	7.4	225	4		264		0	67.4
Female	18	163	43	16.1843	3057	8.9	187	28	264		42		77.2
Male	19	174	73	24.1115	4678	7.1	246	25		237		12	80.1
Female	18	166	63	22.8625	3308	11.2	135	16	263		39		59.9
Female	19	165	47	17.2635	2458	7.9	197	18	208		41		84.4
Female	19	170	60	20.7612	3346	9.1	185	18	238		42		81.1
Male	19	183	65	19.4094	4207	7.9	220	8		245		0	68.3
Female	18	160	50	19.5312	3592	8.4	196	15	203		45		88.6
Female	19	157	51	20.6905	2410	8.4	180	28	201		45		85.4
Female	20	160	48	18.75	2565	9.6	139	19	232		30		71.3
Female	18	172	53	17.9151	3581	9	175	29.1	259		47		83.2
Female	18	167	54	19.3625	3985	9.1	168	12	263		34		77.8
Female	19	160	54	21.0938	3617	8.7	183	20	221		55		86.7
Male	18	176	65	20.984	5111	7.6	225	21		288		3	70.1
Male	18	169	50	17.5064	4160	7.1	230	11.2		243		6	69.4
Male	18	165	54	19.8347	3509	7.5	200	6.5		252		11	70.5
Female	18	164	44	16.3593	3473	10.7	153	23	278		51		68.5
Female	19	167	48	17.2111	2865	8.5	188	25.2	213		50		85.5
Female	19	157	48	19.4734	2887	9.6	160	14	262		45		74
Female	18	161	43	16.5889	3470	8.5	160	23	226		26		79.8
Female	18	158	48	19.2277	2077	8.8	160	12	248		34		73
Female	19	169	55	19.257	3453	9	190	18.1	239		44		83.3
Female	18	163	45	16.937	2989	8.6	179	10.5	255		31		72.9
Female	18	162	45	17.1468	2857	9	154	19	228		32		74.2
Female	19	154	53	22.3478	2911	8.5	178	9	247		44		78.3
Female	18	150	57	25.3333	3396	9.4	163	20.5	242		46		77
Female	18	161	49	18.9036	3234	8.6	190	19.2	217		56		86.5
Male	18	174	56	18.4965	4161	7.1	272	5.7		241		12	79.3
Female	18	157	44	17.8506	3276	8.7	180	27.2	183		33		85.4
Female	19	164	77	28.6288	3470	9.5	161	21.2	267		29		71.3
Female	18	158	45	18.026	4028	8.3	166	15.5	211		36		84.4
Female	19	163	53	19.9481	3356	9.5	148	8.1	234		40		76.7
Female	18	164	56	20.8209	2987	8.7	163	14.4	244		57		80.3
Female	18	158	50	20.0288	3795	9.5	169	13.2	241		46		79.4
Female	18	160	52	20.3125	2937	8.8	150	12.2	251		45		74.7
Female	19	167	46	16.494	3100	9	163	19.5	242		33		74.2
Female	19	168	79	27.9904	3326	9.7	161	16.5	294		30		64.3
Female	19	166	50	18.1449	3326	7.7	203	15.8	196		48		91.4
Female	18	156	50	20.5457	3468	8.8	180	16.5	246		35		81
Female	19	174	65	21.4692	4540	9.3	174	11.4	253		22		75.8
Female	19	151	39	17.1045	2875	9.5	168	26	244		32		75
Female	18	152	46	19.91	3084	9.1	160	28	244		32		79
Male	19	178	58	18.3058	3750	7.2	220	4.5		218		9	74.7
Female	18	154	48	20.2395	3309	9.7	130	14	241		40		70.9
Female	18	154	47	19.8178	2457	9.5	158	11	241		50		73.9
Female	19	163	52	19.5717	3100	9	170	21	231		49		80.8
Female	19	162	51.5	19.6235	3010	8.9	145	12	257		32		72.4
Female	19	150	47	20.8889	2232	9.5	153	15	246		46		73.4
Male	18	174	70	23.1206	5648	6.9	220	19.5		235		3	77.9
Female	18	170	49	16.955	2896	8.5	190	11	221		53		79.1
Female	18	164	50	18.5901	3248	9.3	140	14.5	279		35		68.8
Female	19	151	40	17.5431	2861	9.4	155	18	243		40		73.4
Male	20	172	58	19.6052	4550	7.2	235	16		208		20	86.2
Female	18	164	53	19.7055	3710	10.3	165	12	251		33		75.8
Male	19	168	66	23.3844	4024	7.2	210	13.5		256		19	78.3
Female	19	161	74	28.5483	3108	10.1	152	17	261		26		65.8
Female	19	168	59	20.9042	3700	9.7	152	15	266		26		74.8
Female	19	170	57	19.7232	3600	8.6	168	15.5	185		57		84.8
Female	18	152	60	25.9695	2919	9.6	145	12	273		24		64.7
Female	19	167	95	34.0636	4080	8.8	160	12	259		50		73.9
Female	18	160	71	27.7344	3448	9.4	158	11.5	272		38		73
Female	18	170	50	17.301	2631	8.8	186	18	228		36		79
Female	19	157	43	17.4449	2567	9.2	166	12	271		32		71.9
Female	18	162	60	22.8624	3503	8.8	155	15.5	267		40		78.2
Female	18	164	58	21.5645	3175	9.3	152	15	258		38		75.4
Male	19	168	52.5	18.6012	5237	7.2	235	18		252		20	85.4
Female	19	160	50	19.5312	3180	9	182	20	265		30		77
Female	18	165	54	19.8347	4168	8.8	165	7	243		43		79.6
Female	19	158	50	20.0288	3159	9.5	137	8	239		44		73.2
Female	18	160	56	21.875	3283	9.7	142	25	245		45		76.3
Female	19	172	56	18.9292	3258	8.9	179	18	245		38		79.3
Male	19	177	60	19.1516	4534	7.6	220	14		267		6	70.2
Male	18	175	69	22.5306	4650	6.8	266	8.5		216		10	84.3
Male	18	171	62	21.2031	5559	7.4	217	17		222		7	78.4
Female	18	164	48	17.8465	2745	8.8	163	21.4	232		36		78.4
Male	18	175	67	21.8776	4212	7.5	232	16.5		259		3	69.7
Female	18	162	46	17.5278	3868	9.3	130	16	253		39		73.2
Female	18	160	46	17.9688	3123	8.8	170	24	226		50		82.6
Female	18	175	67	21.8776	4060	8.9	153	1.7	287		32		65.4
Female	19	162	44	16.7657	3383	8.7	180	27.2	221		54		84.8
Female	19	162	55	20.9572	4541	9.6	155	20	258		34		77.4
Female	18	166	54	19.5965	3677	8.5	203	28	224		44		88.9
Female	18	173	63	21.0498	3736	9.2	160	18.9	245		32		79
Female	19	166	59	21.4109	2960	9.5	144	7.3	254		36		71.1
Female	19	162	52.9	20.157	3090	7.9	151	13	239		50		80.3
Female	19	167	52	18.6453	3184	10.1	140	20	251		40		72.1
Female	19	161	51	19.6752	2471	9.3	139	19	236		42		72.6
Female	18	167	59	21.1553	2810	10.3	145	21	252		37		71.5
Male	19	177	73	23.3011	5004	8	205	11.5		258		0	68
Female	18	160	43	16.7969	2387	9.6	177	14.6	225		46		73.5
Female	18	162	55	20.9572	3320	9.8	124	14	246		36		69.5
Female	19	162	46	17.5278	2810	9.5	142	21	252		40		73.5
Male	18	168	50	17.7154	3957	7.7	235	13		185		4	67.5
Female	20	165	45	16.5289	2498	9.8	149	17	245		38		68.8
Female	18	168	58	20.5499	3260	9.2	162	26	255		42		79.2
Female	19	160	38	14.8438	2751	11.3	146	19	302		23		48.1
Female	19	161	55	21.2183	3499	9.1	165	27	254		37		81.8
Female	19	162	48	18.2899	2734	9.2	145	8.5	208		54		77.8
Female	18	157	54	21.9076	3138	9.7	173	12	289		38		69.6
Male	19	177	83	26.493	4641	8.9	170	15		353		0	46.8
Female	18	176	56	18.0785	3193	9.5	166	8.5	243		35		75.8
Female	18	162	52	19.8141	3600	8.5	208	24	195		54		94.6
Female	19	162	60	22.8624	2704	8.5	194	10	226		50		80.9
Female	19	172	56	18.9292	3411	8.5	198	17	219		49		86.7
Female	19	163	44	16.5607	2424	9.2	157	21	264		38		71.1
Male	17	181	52	15.8725	4631	7.8	230	5		233		4	67
Male	19	176	56	18.0785	4355	6.7	277	12		205		10	88
Female	19	157	46	18.662	4066	9.1	177	26	183		29		91.2
Female	18	152	56	24.2382	2985	10.6	147	27	263		25		64.5
Female	18	166	74	26.8544	3452	10	155	14.5	266		38		72.4
Female	19	164	70	26.0262	3336	8.9	153	19.5	228		35		76.7
Female	18	162	48	18.2899	2836	10.8	120	22.5	241		32		62.4
Male	18	178	60	18.937	5245	7.6	243	-13		228		10	73.6
Female	18	166	60	21.7738	3550	8.8	207	26.5	211		43		89.4
Female	18	160	56	21.875	3782	10.2	149	15.5	253		42		75.6
Female	18	160	56	21.875	3297	9.2	197	30	236		34		82.3
Female	18	156	48	19.7239	2152	10.3	135	14	262		42		65.9
Female	19	166	53	19.2336	2605	9.3	157	24	265		42		75.7
Female	18	160	73	28.5156	3606	10.5	123	14.5	303		31		53.6
Female	18	168	46	16.2982	3043	8.9	158	6.5	194		50		79.7
Female	19	156	68	27.9421	2992	10.4	150	16.5	251		44		67.7
Female	19	157	57	23.1247	2200	10.2	156	13	246		39		71
Male	18	182	76	22.9441	3564	8.3	186	9		263		1	58.5
Female	18	168	68	24.093	4566	9.3	169	29.5	185		31		79.8
Female	18	162	51	19.433	3623	8.2	190	10.5	225		33		83.3
Female	18	162	48	18.2899	3370	9.5	174	23	238		30		80.5
Male	19	177	52	16.598	4553	7.9	210	-13.8		292		4	55.1
Male	19	176	55	17.7557	4489	7.1	225	11		256		10	73
Female	19	161	58	22.3757	3665	9.1	170	23	231		53		84.8
Female	19	168	65	23.03	3347	11.5	140	20	255		35		59.5
Male	19	188	75	21.22	5733	7.5	220	0		242		5	67.6
Female	18	168	65	23.03	3562	9.4	171	11	243		52		80.8
Female	18	174	54	17.8359	3443	8.8	175	6	263		53		80.2
Male	19	175	56	18.2857	3949	7.3	216	16		248		7	72.3
Female	19	172	60	20.2812	4116	8.1	181	23	185		48		86.2
Male	19	185	58	16.9467	4960	7.2	233	16.5		251		10	76.5
Male	18	194	114	30.2901	5775	8.2	188	3.7		319		3	51.6
Male	19	168	57	20.1956	5416	7.4	208	23		266		7	75.6
Female	18	150	43	19.1111	2494	9.8	162	25	237		55		78.4
Male	19	181	71	21.6721	4907	7.1	248	17		258		6	75.1
Female	18	158	51	20.4294	2451	10.3	166	16	241		39		73.2
Male	19	169	70	24.5089	4068	7.6	215	11		319		5	58.4
Male	18	172	100	33.8021	4559	8.2	178	10		303		2	48.1
Male	19	180	88	27.1605	5067	8.3	209	9		254		6	68.4
Male	19	178	75	23.6713	4561	7.8	200	5		276		2	62.1
Female	18	176	58	18.7242	3481	8.5	177	16	185		49		84.3
Female	19	167	50	17.9282	3623	9.1	178	14	227		26		81
Male	18	176	56	18.0785	5522	7.4	256	24		427		15	71.2
Male	18	176	60	19.3698	5123	6.6	270	15		201		14	93.7
Male	18	178	74	23.3556	4466	7.5	220	13		254		6	71.2
Female	18	167	66	23.6652	4057	8.6	177	20	239		36		82.6
Male	19	171	60	20.5191	4312	7.6	197	15.5		261		7	68.2
Female	18	161	50	19.2894	3542	8.8	190	25.8	238		31		84.5
Male	18	177	65	20.7476	4727	7.6	180	5		249		0	62.1
Male	18	163	52	19.5717	4721	7.6	203	13		246		10	74.8
Female	19	163	54	20.3244	3980	8.7	176	24	261		45		82.9
Female	18	151	42	18.4202	3833	8.7	130	3	257		48		69.4
Female	18	160	52	20.3125	3490	9.3	181	16	263		57		82.2
Male	19	175	85	27.7551	4587	10	205	10		377		0	38.5
Female	18	168	55	19.487	2571	10.2	135	5.8	269		25		61.9
Female	19	166	64	23.2254	2974	8.2	165	16	229		46		80.5
Female	19	161	48	18.5178	3243	8.8	187	10.5	219		47		81.2
Male	18	178	51	16.0965	5008	6.4	257	10		227		12	83.9
Male	18	182	78	23.5479	5494	7.6	225	22.4		236		1	75.4
Male	18	181	55	16.7883	4004	7.2	252	17		258		9	72.3
Female	18	160	50	19.5312	2342	7.7	217	15.5	184		48		90.3
Female	18	154	48	20.2395	3843	8.7	185	22	192		36		89.7
Female	19	168	55	19.487	3421	8.7	186	19.1	226		35		83.6
Female	18	162	54	20.5761	3791	9.5	185	11.2	236		40		80.6
Female	18	169	50	17.5064	3491	9.4	177	12.6	244		45		80.4
Female	18	162	44	16.7657	2499	9.3	147	13	244		42		70.2
Female	19	165	45	16.5289	3916	7.9	200	21	212		46		86.5
Male	19	168	57	20.1956	5834	8.4	220	10		376		2	56.6
Male	19	172	63	21.2953	3307	8.2	213	7		283		2	60.5
Male	18	180	73	22.5309	3870	7.7	243	7		227		3	70.2
Female	18	163	50	18.8189	3445	8.4	180	14	239		41		82.8
Female	19	164	54	20.0773	2540	9.7	168	27	227		50		79.8
Male	20	174	57	18.8268	4137	7.6	242	9		233		12	77
Female	19	161	50	19.2894	3135	8.2	170	20.4	184		42		81.8
Female	19	161	59	22.7615	3531	9.9	166	21	240		35		79.5
Female	18	162	55	20.9572	3723	8.4	185	13	234		40		83.2
Male	19	172	73	24.6755	4844	9.3	200	12.5		297		2	54.7
Female	18	165	46	16.8962	2615	8.8	205	8.5	237		43		75.7
Female	18	161	46	17.7462	3215	9.6	190	21	218		33		80.6
Female	18	166	75	27.2173	2802	10.2	142	8.7	277		35		62.6
Male	19	172	54	18.2531	4259	7.3	203	18		241		6	70.9
Female	18	160	44	17.1875	2010	8.8	200	12.5	225		41		77.8
Female	18	171	73	24.9649	3830	9.3	182	28	420		27		65
Male	18	189	92	25.7552	6238	7.1	195	13		185		5	69.4
Female	19	159	59	23.3377	4240	8.7	172	17	226		55		85.3
Female	18	165	65	23.8751	3983	9.2	156	15	288		43		73
Male	18	177	60	19.1516	5586	7	160	26		231		0	72.2
Male	18	165	50	18.3655	5189	7.2	216	4		265		4	70.4
Female	18	161	62	23.9188	2749	8.9	154	19	224		48		79.1
Male	18	173	62	20.7157	5074	6.7	214	10		225		0	78.6
Male	19	179	77	24.0317	6813	7	255	24		256		1	74.7
Male	18	175	62	20.2449	5417	7.5	222	14		226		13	82
Female	18	155	46	19.1467	2750	9	142	19	242		48		73.3
Male	19	172	45	15.2109	4386	7.5	170	5		240		6	61.6
Female	18	169	61	21.3578	4070	8.3	190	15	223		50		86.2
Female	18	157	54	21.9076	3304	9.4	140	20	246		43		74.7
Female	19	156	47	19.313	3058	8.2	172	14	226		44		81
Male	18	174	60	19.8177	5248	7.6	226	1		261		3	67.4
Female	19	160	45	17.5781	3220	8.5	165	8	185		46		79.6
Female	18	160	52	20.3125	4056	8.2	198	18	212		50		88.3
Male	19	168	47	16.6525	5658	7	236	23		240		20	85.8
Female	19	166	57	20.6852	3524	8.2	172	26	263		31		82.6
Female	18	168	53	18.7783	3184	7.5	205	20	205		56		93.3
Female	18	156	47	19.313	3999	8	185	23	196		48		92
Female	18	150	60	26.6667	2824	9	156	18	254		28		71.6
Female	18	169	57	19.9573	3090	8.8	156	23	222		28		79.2
Female	18	159	49	19.3821	3526	8.3	186	20	208		49		88.5
Male	19	158	60	24.0346	2000	6.9	228	6		244		6	55.2
Male	18	177	69	22.0243	5401	7.4	240	8		266		4	71.8
Female	20	169	58	20.3074	3300	8	194	16	225		28		83.2
Female	19	165	56	20.5693	3422	9.3	156	7	251		26		75.8
Female	18	167	56	20.0796	4285	9.7	170	27.2	222		41		83.8
Female	19	167	60	21.5139	3216	8.7	160	16.3	212		51		82.5
Female	18	158	46	18.4265	3141	9	165	12.8	243		20		70.2
Female	18	176	78	25.1808	5140	9.6	160	36	303		35		63.6
Female	19	153	40	17.0874	2766	9.1	160	15.6	240		45		73.7
Male	18	178	75	23.6713	4522	6.9	250	3.1		246		1	72
Male	18	180	72	22.2222	3758	7.2	200	9.8		257		1	65.1
Male	19	175	65	21.2245	5357	7.7	200	8.1		185		1	70.6
Male	18	183	65	19.4094	4553	7.2	240	16.5		232		2	74
Male	18	180	55	16.9753	3946	7.1	240	6.2		233		3	67.7
Female	18	177	68	21.7051	4084	9.4	160	21.7	306		17		63.7
Female	19	165	42	15.427	2361	8.7	185	24.7	243		53		75.6
Female	18	164	53	19.7055	3171	7.7	200	24.4	185		55		95.8
Female	19	166	52	18.8707	3220	9	155	11.6	306		39		66.3
Male	18	176	68	21.9525	4607	6.8	235	18		242		20	87.4
Female	18	155	55	22.8928	2763	9.1	170	14.7	261		49		76.2
Female	18	162	46	17.5278	2948	8.3	200	30.6	236		43		84.1
Female	19	155	60	24.974	3078	9.2	165	16	248		40		73.6
Male	18	174	56	18.4965	3586	7.5	250	13.8		252		6	71.4
Female	18	162	49	18.6709	2999	9.9	135	13.8	211		48		73.7
Female	19	162	45	17.1468	2618	9.8	175	10.8	286		37		64.8
Male	18	173	70	23.3887	3835	6.9	255	19.6		231		1	75.5
Female	18	171	65	22.2291	3304	9.8	145	19	256		31		72.9
Male	18	173	63	21.0498	4407	7.6	210	10		244		7	71.6
Female	18	171	55	18.8092	2500	9.8	165	16.6	301		28		64.9
Female	18	167	60	21.5139	3717	9.4	150	11.3	303		39		62.6
Male	19	172	48	16.225	4474	8	220	10.3		253		1	64.6
Male	19	177	75	23.9395	5363	6.8	260	20.7		198		1	85
Female	17	167	68	24.3824	3150	9.4	160	11	241		40		73.4
Female	19	157	53	21.5019	3569	10	165	17	258		40		77.4
Female	19	167	59	21.1553	2766	12.1	180	23	252		42		64.1
Female	18	159	49	19.3821	2117	10.1	150	13	269		37		68.1
Female	18	159	42	16.6133	3460	9.1	175	14	258		50		77.9
Male	18	184	50	14.7684	4532	8.2	210	17		297		3	59.4
Female	19	159	45	17.7999	2994	8.1	175	13	265		43		77.3
Male	19	188	66	18.6736	4956	6.8	110	15.5		308		7	66.8
Male	18	175	60	19.5918	4712	8.7	205	16		222		1	69.2
Female	18	168	50	17.7154	3050	8.8	155	23	243		47		79.4
Male	18	187	62	17.73	5162	7.9	220	22		311		0	65
Male	18	180	67	20.679	4327	7.7	220	12		303		2	63.4
Male	19	185	85	24.8356	5285	7	205	11		272		0	68
Male	19	175	85	27.7551	2654	8	150	-2		302		0	38.5
Female	19	155	60	24.974	3857	10	160	24.5	269		42		75.5
Female	18	161	54	20.8325	3609	8.4	205	17	255		39		83.1
Female	18	158	38	15.2219	1874	10.3	145	-4	281		11		41
Male	18	188	62	17.5419	5288	8	180	24		297		2	58.5
Female	19	161	54	20.8325	3857	9.4	145	16	245		40		76.4
Male	18	178	80	25.2493	5918	7.7	200	2.5		277		0	59.8
Female	19	168	63	22.3214	2142	9.7	145	21	257		42		70.8
Female	19	162	51	19.433	2838	12.9	125	15	420		37		40.6
Female	18	165	47	17.2635	3467	10.5	180	21.5	246		24		75.3
Female	19	164	50	18.5901	2638	10.3	175	17	240		34		74.2
Female	18	165	57	20.9366	3401	10	175	16.5	259		31		77.2
Female	19	155	54	22.4766	2639	9.2	140	17	256		41		71
Male	19	173	71	23.7228	2591	7.3	240	20		300		11	64.1
Female	20	156	58	23.833	2574	8.5	180	14	223		20		75.1
Female	20	155	45	18.7305	2348	9.1	135	-8	234		34		63.3
Female	18	172	72	24.3375	2285	9.5	175	12	234		38		72
Male	20	178	57	17.9902	4419	7.7	210	18		277		3	65.8
Female	19	158	51	20.4294	3389	9.6	170	21.9	242		35		79.4
Female	18	165	51	18.7328	3029	8.6	169	16.2	228		27		78.4
Female	18	163	51	19.1953	3577	9.4	183	30.3	246		40		83
Male	18	174	52	17.1753	4209	7.4	220	4.6		265		10	69.9
Male	18	171	80	27.3588	4298	9	185	11.7		283		1	53.7
Female	18	154	53	22.3478	3553	8.8	158	22.2	229		28		82
Male	19	175	98	32	5501	8.4	183	10.4		269		0	57
Female	18	155	45	18.7305	2918	8.8	148	16.7	221		48		78.1
Female	18	165	60	22.0386	4226	8.3	192	18	208		54		89.8
Female	19	156	47	19.313	2606	10.8	139	11.9	277		17		52.6
Female	18	165	54	19.8347	3120	11	158	16.9	273		31		63.4
Male	19	182	58	17.51	4353	7.3	235	0		244		4	58.8
Female	18	158	51	20.4294	2699	9.6	148	12.1	240		42		72.8
Female	19	162	52	19.8141	3843	9.3	155	11.4	185		41		79.6
Male	19	175	101	32.9796	5813	7.4	207	13.5		257		0	64.8
Female	19	160	51	19.9219	2630	9.6	145	16.6	261		36		70.4
Male	18	182	90	27.1706	6134	7.3	219	14		268		0	68.4
Female	18	165	56	20.5693	3600	9.1	132	26.3	244		37		77.8
Male	19	175	63	20.5714	4604	6.9	252	0.4		253		10	75
Female	18	166	53	19.2336	3548	9.3	159	18.9	227		44		81.6
Female	19	168	65	23.03	5007	8.4	173	26	219		45		86.8
Female	18	153	46	19.6506	2528	8.8	173	27.3	249		34		78.5
Female	19	154	71	29.9376	3141	10.2	139	14.9	321		33		51.8
Male	19	176	70	22.5981	4469	7.8	215	8.2		185		0	69.4
Male	19	165	70	25.7117	4188	7.4	213	-2.5		267		0	57.5
Female	18	164	65	24.1672	4241	9.2	153	28	241		29		77.6
Male	17	172	64	21.6333	5927	8.4	218	11.5		271		1	68.6
Male	18	169	73	25.5593	4739	7.9	213	19.8		266		1	66.3
Female	18	155	60	24.974	3038	8.5	192	14.3	231		35		77.3
Female	19	154	50	21.0828	2491	9.8	152	12	247		29		71
Female	19	162	53	20.1951	3733	9	175	11.5	231		35		80.8
Female	18	158	59.5	23.8343	4526	9.6	145	21	244		26		76.1
Female	17	166.5	65	23.4469	3886	9.4	130	13.3	240		46		74
Female	18	166.5	54	19.4789	4236	8.9	185	17.8	231		55		85.3
Male	18	177	60.5	19.3112	4799	7	248	5		265		10	77.2
Male	18	173.5	53.5	17.7728	4553	7.4	253	8		317		8	64.6
Male	18	173	66.5	22.2193	4526	6.7	250	33		245		13	86.2
Male	18	174	73.5	24.2767	5248	7.4	220	15.3		287		1	66.4
Female	19	157	43	17.4449	2828	9.6	145	27.4	248		29		73.8
Female	19	166	69	25.0399	3787	8.8	159	12.1	225		30		77
Male	20	169	57.5	20.1323	3573	6.7	252	13.5		241		5	74.9
Female	18	162	54.5	20.7667	3634	9.3	175	16	224		38		82.2
Female	18	159.5	54	21.2262	3595	10.4	122	5	253		38		64.8
Male	18	168.5	51.5	18.1388	3917	7.3	203	11.3		244		4	63.4
Female	18	157.5	43	17.3343	2945	8.8	142	14.1	237		44		75.3
Male	19	181	70.5	21.5195	5560	7.2	257	20.9		276		3	72.6
Female	19	158	50	20.0288	3458	9.3	162	10.7	242		40		79
Female	18	151	42	18.4202	3123	8.8	173	21.5	228		48		81.3
Female	17	166	61	22.1367	3812	9.1	158	19	255		33		78.6
Male	19	166	65	23.5883	5800	7.5	232	34		241		5	77
Female	18	163.5	45	16.8336	3651	9.5	173	21.6	245		37		77.5
Female	18	161	55.5	21.4112	3745	8.6	178	20.3	233		32		82.8
Female	18	156	53	21.7784	3642	9.4	173	22.6	245		32		80.6
Female	19	156	44	18.0802	2663	9.5	160	18.7	263		17		67.6
Male	18	170.5	65.5	22.5316	4955	8.1	208	16.7		306		0	65
Female	18	154	46	19.3962	3413	9.5	143	19.4	222		5		71.6
Female	18	161.5	68	26.0714	4044	10	165	19.8	242		44		74.8
Female	18	155.5	62	25.6408	3064	9.3	151	12	238		41		73
Male	18	183	79.5	23.7391	5959	7.4	245	13.2		228		3	75.4
Female	17	165	70	25.7117	4072	15.2	152	26.7	345		34		49.8
Male	19	186	75	21.6788	4690	7.7	248	19		365		2	60.5
Female	18	155	59	24.5578	3135	13.5	152	26	327		40		47.4
Female	18	165	56	20.5693	3411	8	182	22.1	268		44		83.7
Female	18	168	65	23.03	3659	8.3	195	23.3	183		54		91.5
Female	18	160	50	19.5312	3518	7.9	171	29.3	216		50		89.7
Male	18	172	65	21.9713	4145	7.6	237	15.3		275		1	66.2
Male	18	172	54	18.2531	4412	7.3	255	16.5		275		6	70.4
Male	19	188	88	24.8981	6371	7.5	235	24.7		244		3	68.9
Female	19	165	56	20.5693	3808	8.4	195	26.5	237		48		87.4
Female	18	163	53	19.9481	3000	8.1	155	15	241		46		78
Female	18	165	50	18.3655	3480	7.6	188	19.6	266		38		85.1
Male	18	187	84	24.0213	6204	7.3	239	13		287		1	67.2
Male	18	174	63	20.8086	4204	7.7	222	12.7		244		1	65.3
Male	19	180	73	22.5309	5482	6.3	267	12.7		247		7	83.2
Female	18	160	49	19.1406	3889	8.7	137	24.2	252		54		80.8
Male	18	183	60	17.9163	6541	7.5	205	10.5		278		3	67
Female	18	160	55	21.4844	3740	8.8	154	19.6	241		47		80.6
Male	19	175	50	16.3265	2987	6.4	245	12.5		311		5	63.5
Male	19	183	70	20.9024	5263	7.3	247	14.1		248		1	74.4
Female	18	165	56	20.5693	3665	8.8	203	22	244		41		84.6
Female	18	158	56	22.4323	3022	9.2	172	17	253		40		77
Female	19	165	56	20.5693	3755	9.1	176	29.1	264		35		81.6
Female	18	165	50	18.3655	3959	9	166	20.2	232		42		82.2
Female	18	168	65	23.03	4441	7.9	172	11	242		48		81.8
Female	17	162	63	24.0055	3560	9	147	14.1	224		35		76.4
Male	23	172	64	21.6333	6226	7.9	211	14.7		258		4	70.6
Female	18	166	52	18.8707	2983	8.8	175	16.4	236		47		79.5
Female	18	161	43	16.5889	2564	9.1	180	10	240		42		73.3
Male	18	174.5	81.5	26.765	5521	7.5	210	13.2		252		5	70
Male	19	167	63.5	22.7688	5024	7.7	222	12.1		272		3	69.8
Female	18	156	51	20.9566	2885	9.7	160	9.6	241		42		73.8
Male	18	182	76	22.9441	5633	6.8	265	13		243		10	85.2
Female	18	163	57	21.4536	4117	8.9	155	13	272		46		78
Female	19	156	47	19.313	3692	9.8	163	11	299		42		69.8
Male	18	176	51	16.4644	5214	7.6	210	13.3		241		5	70.4
Female	18	170	61	21.1073	4476	8.3	193	15.3	219		55		87.4
Female	18	163	59	22.2063	3888	7.9	192	20.7	207		46		90
Female	18	166	60	21.7738	3095	8.5	160	20.2	228		35		79.6
Male	18	177	89	28.4082	5927	7.5	210	14		267		0	65
Male	18	166	52	18.8707	4495	6.6	225	12		235		11	82
Male	18	180	61	18.8272	5537	7	238	7		241		7	77.4
Male	19	172	60	20.2812	4422	7.4	200	1.8		256		0	63.4
Male	19	168	75	26.5731	5081	7.8	175	17.5		279		0	59.2
Male	18	176	67.5	21.7911	4288	6.5	270	20		235		7	82.5
Male	19	186	85	24.5693	5727	7.2	230	18.3		256		0	70.8
Female	19	171	61.5	21.0321	3533	8.4	165	19	201		41		86.8
Male	18	180	73	22.5309	4427	7.2	220	11		253		0	69.4
Male	18	180	60	18.5185	4329	7.4	200	-4.5		281		5	57.2
Male	18	165	50	18.3655	3627	7.9	220	16		256		6	69
Female	18	167	48.5	17.3904	3308	8.8	190	26.5	240		54		85.7
Male	19	177	58	18.5132	5442	6.5	265	20		232		8	86.7
Male	18	180	64	19.7531	5530	6.2	240	17		275		4	75.4
Male	19	178	60	18.937	4991	7	240	10		245		3	74.7
Male	18	180	64	19.7531	5106	7.9	240	-3		319		0	58
Male	19	189	88	24.6354	6063	7.5	220	14		259		0	69
Male	19	185	80	23.3747	5225	7.3	220	7		263		0	71
Male	19	173	80	26.7299	5197	7.8	215	5		319		1	59.6
Male	19	182	54	16.3024	4862	6.9	240	11		283		0	68.1
Male	18	175	58	18.9388	3753	8.7	195	13		275		0	58.5
Male	18	172	62	20.9573	5185	7.8	215	3.5		319		0	61.6
Female	18	170	51	17.6471	3999	7.8	200	30	205		38		91.2
Male	18	182	60	18.1138	5378	7.3	255	11.5		274		7	73.6
Male	19	181	59	18.0092	4855	7.9	255	26.5		294		6	70.9
Male	18	180	60	18.5185	5682	6.6	255	18.5		247		10	86
Female	19	168	52	18.424	3250	8.8	175	17.5	185		36		80
Female	18	161	47	18.132	3223	9.9	145	18	185		45		75.3
Female	18	169	54	18.9069	3608	9.7	130	12	262		37		70.8
Female	19	165	52	19.1001	3475	9.9	150	12.5	248		32		75.4
Female	18	158	46	18.4265	3488	9.5	160	17	245		44		79.6
Male	18	178	55	17.3589	5710	7.9	210	14.5		284		0	64.8
Female	18	165	52	19.1001	4456	8.8	145	17.5	263		32		75.8
Female	18	160	46	17.9688	3747	9.4	160	23	246		44		81
Female	18	160	48	18.75	3570	8	190	19	294		54		81
Female	18	170	52	17.9931	4877	8.5	195	19.5	219		50		87.1
Female	18	158	41	16.4237	2243	8.5	185	19	294		21		64.2
Male	19	183	64	19.1108	5382	6.7	270	10.5		253		0	79.5
Female	18	159	52	20.5688	2890	9.7	145	16	249		39		72.2
Female	18	172	63	21.2953	4752	8.7	180	14	218		46		84.2
Male	19	180	58	17.9012	4343	7.2	250	19		224		12	81
Male	18	168	57	20.1956	4203	7.8	220	9		265		2	66.7
Male	18	178	59	18.6214	6005	6.7	235	21		219		2	81.7
Female	18	149	48	21.6206	3312	9.6	155	12	232		34		76.7
Male	18	170	60	20.7612	4578	6.9	258	8		183		14	85.5
Female	18	161	55	21.2183	3688	8.4	180	22	218		49		86.4
Female	18	159	48	18.9866	3115	9	185	17	219		43		80.6
Male	19	174	54	17.8359	4442	8.5	265	22		234		12	76.8
Male	19	176	68	21.9525	4707	7.2	225	28		212		6	79.2
Male	18	180	58	17.9012	4905	7.6	230	3		254		8	72.5
Female	18	164	50	18.5901	3394	8.2	205	11	182		47		88.3
Female	18	163	52	19.5717	3423	9.3	170	23	184		44		84
Male	18	167	50	17.9282	2929	8	180	4		226		6	58.6
Female	18	160	55	21.4844	3493	8.2	168	19	183		51		87.5
Male	18	174	58	19.1571	4978	6.9	250	13		256		3	75.7
Male	19	173	58	19.3792	5290	6.9	220	24		256		5	78.3
Male	19	170	50	17.301	4000	7.7	225	10		267		15	71.9
Female	20	164	48	17.8465	3794	9	170	18	224		52		84.4
Male	18	182	75	22.6422	4725	10	220	2		273		2	50.4
Female	18	165	45	16.5289	2685	8.5	185	22	224		54		80.4
Male	18	177	72	22.9819	4203	7.9	170	11		244		2	62.1
Male	18	166	65	23.5883	4072	9	220	10		255		2	65
Female	18	161	50	19.2894	3107	9.5	152	23	231		32		77.4
Female	18	160	50	19.5312	3313	8.4	175	14	215		34		82.7
Female	18	155	45	18.7305	2602	9.2	175	24	221		35		79.7
Male	19	173	65	21.7181	4628	8.5	270	12		244		6	73.5
Female	19	160	51	19.9219	4024	8.5	178	13	216		40		84.8
Female	19	174	61	20.148	3664	11.9	100	-3.8	302		19		38
Male	18	182	60	18.1138	4830	7.5	210	17.3		276		1	67.5
Female	18	165	55	20.202	3572	8.4	160	2	228		46		76.8
Male	19	175	75	24.4898	3323	8	220	19.5		267		1	62.8
Male	19	180	59	18.2099	3947	7.4	237	4.6		298		1	62.7
Male	18	174	54	17.8359	4465	7.5	232	5.2		241		12	73.8
Female	19	167	48	17.2111	2722	10.5	166	9	243		38		71.1
Male	18	181	78	23.8088	3964	7.3	235	6		255		1	68.3
Female	19	153	46	19.6506	3301	9.5	178	19.5	294		50		74.4
Female	19	160	47	18.3594	2436	12	130	6.7	333		45		40
Male	18	188	84	23.7664	5179	7.1	250	23.9		299		3	71.5
Female	18	163	50	18.8189	2334	11	145	15.6	283		37		57.3
Male	18	182	88	26.5668	5400	7.8	220	9.3		278		1	64.8
Male	19	179	53	16.5413	3602	10.3	180	7		269		10	46.6
Male	18	175	64.5	21.0612	3936	7.6	205	24.1		285		1	65.1
Female	19	169	54	18.9069	3230	8.2	151	12.6	207		40		82.2
Female	18	150	40	17.7778	3169	8.8	189	29	239		42		83.5
Male	18	180	90	27.7778	5032	8.1	240	5.1		306		1	62.1
Male	19	182	60	18.1138	4532	7.1	235	8.2		251		5	71.4
Male	20	187	78	22.3055	4851	6.7	232	3		241		5	75.3
Female	18	165	60	22.0386	2898	8.6	175	22.7	252		45		79.6
Female	18	161	45	17.3604	2662	8.2	191	18.3	219		51		82.6
Female	18	160	63	24.6094	3543	9.3	151	6.7	238		32		74.4
Male	19	181	81.5	24.8771	4466	7.5	170	4.2		274		1	55.2
Male	18	175	75	24.4898	4632	9.3	190	8.3		303		1	51.4
Female	19	160	49	19.1406	3390	9.8	155	20.8	239		36		78.5
Male	18	180	65	20.0617	4963	7.6	235	14.2		281		4	68.7
Female	18	162	48	18.2899	3334	9.9	157	22.3	232		26		77.9
Male	19	180	86	26.5432	4987	7.1	220	8		223		0	71
Female	18	175	62	20.2449	3850	9.1	160	18	420		39		66
Female	18	167	75	26.8923	3794	10	140	7	253		48		70
Female	18	172	52	17.5771	3807	9.6	138	17	243		42		75.8
Male	19	183	69	20.6038	5581	7.6	210	0		420		0	52.8
Male	18	180	65	20.0617	5886	7.6	203	0		254		2	65
Male	19	190	94	26.0388	6264	7.8	192	10		240		0	64.6
Male	19	176	91	29.3776	6265	7.9	230	10		255		0	65.4
Male	18	171	54	18.4672	3856	6.8	238	5		251		1	71.8
Female	18	168	57	20.1956	3831	8.9	148	24	261		30		78.5
Male	19	170	59	20.4152	5147	7.6	193	10		263		0	67
Male	18	175	53	17.3061	2924	7.7	195	1		245		10	58.8
Female	18	165	57	20.9366	3605	8.3	162	8	233		35		80.8
Male	18	176	53	17.11	4405	8.2	173	-7		326		0	43.6
Female	18	153	52	22.2137	3124	9.6	166	17	244		44		72.6
Male	18	176	75	24.2123	5823	7.6	215	17		264		5	69.2
Female	18	168	49	17.3611	3818	8	192	19.5	216		46		88.5
Male	18	177	55	17.5556	4976	7.1	217	4.5		248		6	70.3
Female	18	159	44	17.4044	3773	8.5	171	23	213		53		87.8
Male	18	180	61	18.8272	5085	7.1	197	0		245		1	61
Female	19	160	50	19.5312	2610	9	175	18	183		40		81
Male	18	168	58	20.5499	5110	7.4	228	6		236		2	73.2
Female	18	165	52	19.1001	3789	8.9	185	15	218		41		83.4
Male	18	175	52	16.9796	4992	7.2	225	16		293		1	64.3
Male	19	177	75	23.9395	4869	7.1	217	3		241		2	69.5
Female	19	156	51	20.9566	3742	8.8	185	17.5	219		30		82.8
Female	18	160	52	20.3125	3524	8.6	176	17	214		31		83.8
Male	19	170	67	23.1834	4333	8.2	187	4		304		0	55.6
Female	18	161	47	18.132	2621	9.1	157	6.5	420		54		62.1
Female	19	164	53	19.7055	2674	11.5	162	1.5	275		27		48.4
Male	18	175	73	23.8367	4683	7.4	225	10		229		1	71.8
Male	19	175	83	27.102	5317	8.3	195	10		279		0	60.4
Female	18	160	51	19.9219	3804	7.9	205	23.3	206		58		94.5
Male	18	167	67	24.0238	4246	7	197	10		231		2	65.7
Male	18	180	66	20.3704	5288	6.9	225	16.5		258		3	75.4
Male	18	170	78	26.9896	5138	12	236	0		427		0	36.4
Male	19	174	60	19.8177	4000	7.3	180	13		236		1	63.7
Female	18	157	82	33.2671	2637	10.7	135	20	342		26		43.8
Female	19	155	54	22.4766	2586	9.2	157	20.5	266		41		73.7
Female	19	161	48	18.5178	3097	8.5	175	25	236		36		81.5
Male	18	173	69	23.0546	4286	8.4	158	7.5		267		0	58.7
Female	19	155	44	18.3143	3268	9.4	158	19.2	249		55		79.3
Male	18	175	73	23.8367	3896	12	260	16		245		16	60.4
Male	18	182	87	26.2649	5508	7.2	240	3.5		277		1	65.2
Female	18	155	55	22.8928	2667	8.6	150	14.2	272		34		72
Male	18	164	66	24.539	3998	7.6	205	12.5		265		1	62.5
Male	19	175	80	26.1224	5175	8	210	9		244		1	63.6
Female	18	160	73	28.5156	3042	11.8	107	20.5	327		31		35.4
Female	18	160	52	20.3125	2638	9.5	167	6.5	228		35		74.8
Male	18	180	87	26.8519	5566	7.6	212	21.2		242		0	69.3
Male	18	177	60	19.1516	3858	7.2	230	7.5		303		1	62.8
Female	18	165	70	25.7117	3603	9.2	188	20	236		34		79.1
Male	18	175	75	24.4898	4540	7.7	228	7		255		0	65.4
Female	18	153	46	19.6506	1654	11.8	145	25	284		9		38.5
Female	19	162	62	23.6244	4195	9.7	173	24.2	254		33		80.3
Male	19	181	86	26.2507	5829	7.1	207	11.5		219		11	77.4
Female	19	154	45	18.9745	2820	9.2	155	22.7	257		30		75.2
Female	18	167	62	22.231	3608	9.3	170	22	232		61		86.9
Female	18	173	62	20.7157	3743	8.8	178	23.1	225		37		84.2
Male	18	178.5	93	29.1881	6022	7.4	210	20.6		258		0	66.5
Male	19	166.5	67	24.1683	4372	7.8	222	19		238		6	69.4
Male	18	173	75.5	25.2264	5090	7.4	228	22		294		0	66.2
Male	19	170	64	22.1453	4904	7.3	233	5		256		11	76.9
Male	19	180	77	23.7654	6529	7.6	250	6.4		301		1	67
Male	19	184	109	32.1952	5091	8	205	6		265		0	61.6
Female	18	156	44	18.0802	3298	9.5	159	19.4	225		44		79.1
Male	18	171.5	68	23.1196	5832	8	240	27.5		256		3	74.8
Female	19	155	62	25.8065	3534	10	152	15	239		51		75.9
Female	19	160	59	23.0469	2366	9	155	13.1	234		55		77.2
Male	18	177	79	25.2163	5982	8.3	165	11		301		0	55.6
Female	18	156	50	20.5457	3418	10	145	19.2	245		39		75.6
Male	18	168	75	26.5731	6101	8	203	14.3		258		1	66.2
Female	18	160	54	21.0938	3468	10	162	18.5	232		48		80
Male	18	166	81.5	29.5761	4683	7.7	220	16.3		272		0	62.9
Male	20	174.5	84	27.586	4662	8.3	170	5		305		0	52.4
Male	18	171	70.5	24.11	4644	8	224	19.1		258		0	66.3
Female	18	159	53.5	21.1621	3811	10.6	138	1	257		38		61.4
Male	18	172	63	21.2953	4296	8	216	25		247		0	71.1
Female	18	158	49	19.6283	3134	10.6	144	18	263		32		66.2
Female	18	162	48	18.2899	2986	9.7	155	12	265		52		74.3
Female	18	163	52	19.5717	2451	8.5	180	20	236		57		81.4
Female	18	170	72.5	25.0865	4046	9.4	165	15	258		41		75.2
Male	18	177	89	28.4082	4952	8.3	205	14		309		0	57.3
Female	18	173	59	19.7133	4040	8.2	196	13	207		63		94
Male	18	175	66.5	21.7143	5377	6.9	250	11.5		213		12	86.8
Female	19	162	50	19.052	3321	9	174	14	223		45		81.3
Male	19	174	55	18.1662	5149	7.8	252	11		240		16	82.3
Female	18	171	54	18.4672	3312	9.4	156	34	239		31		79.5
Male	19	166	69	25.0399	4283	7.8	184	14.3		295		0	54.5
Female	19	163	50	18.8189	4134	9.6	174	19	244		56		83
Female	18	167	55	19.721	3574	9.4	162	26.8	249		45		82
Female	18	167	63	22.5896	3340	9.5	171	19.4	248		47		79.3
Male	19	177	50.5	16.1193	3801	7.2	262	17.5		245		19	78.4
Male	18	183	58	17.3191	4251	7.8	220	7		239		3	65.5
Male	18	185	67.5	19.7224	5308	7.2	245	14		235		2	75.6
Female	19	162	54	20.5761	3713	9.4	160	20	231		52		82.4
Male	19	168	50.5	17.8926	3917	7.5	233	25		248		4	71.8
Female	19	160	57	22.2656	2804	9.7	151	11	281		31		68.6
Female	19	158	46	18.4265	2952	9.4	158	16	240		38		75.7
Male	19	176	62.5	20.1769	4872	7.5	248	11.3		224		4	74.3
Male	19	182	90	27.1706	6003	7.5	210	11		248		2	68.8
Male	18	167	63	22.5896	4709	7.4	217	14		240		3	71.2
Female	18	166	45	16.3304	2982	9	185	21.6	231		31		76.2
Male	18	182	63.5	19.1704	4942	7.6	232	15.3		184		4	74.8
Male	18	173	69	23.0546	4948	7.8	223	-10		296		1	58.3
Male	18	180	70	21.6049	4442	8.8	207	16.4		296		0	60.2
Male	19	178	53	16.7277	3874	7.5	226	4		266		5	64.2
Female	18	167	51	18.2868	3955	8.7	160	25.8	228		43		85
Female	19	161	52	20.061	3679	9.1	165	8	251		35		77.8
Male	19	178	72	22.7244	4837	7.7	248	6.5		241		5	72.3
Male	18	174	53	17.5056	4345	8.3	200	8		241		2	62.6
Male	19	178	85	26.8274	6115	7.6	200	11		265		2	65.2
Male	18	177	82	26.1738	5310	7.7	195	7.5		261		2	64
Male	19	182	71	21.4346	5579	7.8	220	5		259		5	70.8
Female	18	170	59	20.4152	3415	8.7	145	24	244		41		80.5
Female	18	159	54	21.3599	2850	9.9	145	21	274		29		69.9
Male	18	184	75	22.1526	5119	7.4	230	17		261		2	72.8
Female	18	168	61.5	21.79	3185	9.3	198	23	234		39		82.2
Female	19	162	47	17.9089	3253	9.9	178	17	237		38		78
Female	19	164	67	24.9108	3563	9.7	168	22	265		39		75.3
Female	19	155	49	20.3954	3624	10.4	140	20	245		38		72.2
Female	19	171	53	18.1252	4024	8.8	170	18	242		42		80.2
Male	19	174	55	18.1662	4070	6.8	240	4		232		11	80.6
Male	18	169	70	24.5089	5240	7.8	215	28		263		16	78.5
Female	18	164	80	29.7442	3715	10.8	150	20.5	313		36		54
Male	18	170	65	22.4913	5068	6.9	242	12.5		242		20	86.6
Male	19	180	65	20.0617	5290	7.1	195	10		258		7	71.6
Male	18	177	65	20.7476	3490	8	248	19		276		8	68.9
Male	18	177	67	21.3859	4534	7.4	227	18		246		5	72
Female	18	164	45	16.7311	3519	8.7	210	24	223		49		86.2
Male	18	178	62	19.5682	5735	7.2	233	5		272		19	80.8
Male	17	174	73	24.1115	4801	8.7	200	6		296		2	56.5
Female	18	158	60	24.0346	3373	12	111	18	313		33		44.6
Female	19	168	46	16.2982	3169	9.8	145	27.7	248		42		73.2
Male	18	177	51	16.2788	4046	7.5	250	7.9		251		9	71.5
Male	19	177	73	23.3011	5840	7.3	215	14.2		263		3	71.6
Female	19	167	50	17.9282	3169	9.3	160	1	241		50		71.3
Male	18	184	61	18.0175	4977	7.4	220	5		229		0	72.3
Male	18	185	76	22.206	4856	7.7	200	12.4		237		1	69.3
Male	18	179	72	22.4712	4640	7.9	219	17.4		283		0	66.3
Male	19	173	50	16.7062	4861	7.5	225	11.7		232		3	69.7
Male	19	180	82	25.3086	4618	7.6	200	15.5		236		0	66
Male	19	181	55	16.7883	4218	7.4	258	10		241		0	68.6
Female	18	168	48	17.0068	2552	9.7	151	12.1	242		48		70.9
Male	18	178	53	16.7277	4049	7.1	246	3.7		240		7	70.3
Female	18	165	47	17.2635	1516	8.9	175	18.7	240		40		67
Female	18	171	56	19.1512	2809	8.3	186	17.5	223		41		81.4
Female	18	170	56	19.3772	3688	8.5	176	20.5	227		48		84.8
Male	19	173	63	21.0498	4824	7.8	170	5.5		247		0	63.1
Female	19	165	54	19.8347	2908	8.2	170	18.8	203		50		85.2
Female	18	156	44	18.0802	2205	12.3	147	19.4	285		44		53.4
Male	18	181	73	22.2826	5042	7.5	230	13.1		251		3	73
Female	18	162	49	18.6709	3816	9.4	171	6.3	222		57		82.8
Female	18	156	42	17.2584	2771	8.9	180	14	235		48		78.7
Male	18	181	62	18.9249	5472	7.2	240	14.1		225		7	79.2
Male	18	180	72	22.2222	4456	7.2	205	10		283		0	64.4
Female	18	174	55	18.1662	3308	8.9	190	11	214		45		83.2
Female	17	164	50	18.5901	2771	9.9	141	15.1	275		27		66.3
Male	19	179	61	19.0381	4843	7.2	236	18.4		231		0	74.7
Male	18	172	53	17.9151	3404	7.2	220	11.4		257		4	67
Female	19	167	50	17.9282	3640	8.3	179	22	204		60		93.3
Male	18	183	77	22.9926	6148	7.1	204	4		263		2	69.4
Female	18	172	48	16.225	3696	9.7	157	16.5	239		44		76.8
Male	18	175	71	23.1837	5424	7.1	227	3.5		269		2	69.8
Female	18	160	48	18.75	3049	10	174	11.5	258		54		76.3
Male	18	164	83	30.8596	3867	8	194	15.5		273		2	54.4
Male	19	183	64	19.1108	6095	7.1	286	23		248		3	78.6
Male	18	186	72	20.8117	4866	7.6	197	25.5		257		2	69.5
Male	19	168	40	14.1723	3336	7.9	211	7.5		242		12	67.7
Male	18	170	77	26.6436	4274	7.8	193	6		259		2	60.1
Female	18	156	53	21.7784	3221	8.1	177	21.5	209		44		85.6
Female	19	164	55	20.4491	3538	8.7	153	16.5	242		45		81
Female	18	160	47	18.3594	2840	9.7	153	25.5	255		44		76.1
Male	19	180	56	17.284	4395	6.9	238	10.5		264		7	71.6
Male	18	179	104	32.4584	5164	8.3	180	24		283		2	57.1
Male	19	165	65	23.8751	2618	7.2	232	21		283		8	63.3
Male	18	187	69	19.7318	5890	7.5	207	16		244		2	71.8
Female	18	163	57	21.4536	2184	9.5	164	18	224		44		76.3
Female	18	159	49	19.3821	3954	9.2	164	14.5	240		50		80.9
Female	18	163	44	16.5607	3699	9.7	163	27.5	240		44		79.2
Male	19	173	55	18.3768	3490	6.9	224	15		199		17	85.3
Male	19	176	62	20.0155	5170	7.2	228	25		242		7	80
Male	18	168	72	25.5102	4114	8.2	209	1.5		266		2	58.4
Male	18	183	66	19.708	3863	9	171	6		264		2	56.4
Female	18	162	60	22.8624	3137	9	159	24.5	235		29		78.3
Female	18	147	41	18.9736	2860	9.2	159	18	211		36		78.6
Female	19	162	48	18.2899	3953	9	170	23.5	257		30		80.2
Male	19	181	74	22.5878	5453	7.8	230	12.5		243		1	70.6
Male	19	171	90	30.7787	6188	7.3	205	17		273		1	62.4
Male	18	178	62	19.5682	4807	7.2	218	11		240		2	71.9
Male	19	170	55	19.0311	3820	7	245	8.5		427		8	61.2
Male	18	184	65	19.199	5064	7.5	223	11		284		1	68.8
Male	19	173	60	20.0474	4684	7.3	192	-2.5		278		0	55.4
Female	18	164	51	18.9619	3057	9.4	138	13	288		45		66.4
Male	18	183	102	30.4578	5467	7.7	212	10		283		1	61.8
Male	18	183	61	18.2149	5519	6.9	228	14.5		236		3	77.2
Male	18	172	59	19.9432	4456	7.3	206	6.8		247		1	68
Female	18	167	44	15.7768	2559	9.3	151	11	223		51		73.6
Female	19	168	52	18.424	2855	9.1	168	10	288		53		71.4
Male	19	175	71	23.1837	4450	7.2	198	14.5		255		3	67.2
Female	19	161	48	18.5178	2796	8.9	185	23.8	235		33		79.3
Female	19	165	46	16.8962	3248	8.6	183	9	243		46		76.8
Female	18	164	55	20.4491	3636	8.8	153	20	216		48		83.8
Female	18	164	59	21.9363	3161	9.4	148	30	183		33		81
Female	18	164	60	22.3081	3468	8.3	178	21.5	212		52		88.3
Male	19	170	62	21.4533	4309	8.3	172	10		243		2	59.4
Female	18	161	46	17.7462	1652	8.9	187	27	247		35		68.6
Male	19	179	61	19.0381	4989	6.8	262	19		246		6	80.8
Male	18	182	78.5	23.6988	6142	7.3	232	9		241		1	73
Female	17	168	50	17.7154	2873	8.4	197	18	259		35		78.8
Male	18	180	73	22.5309	5132	6.9	235	24.5		281		8	78.7
Female	19	164	48	17.8465	2396	9.1	172	20	185		30		83.1
Female	19	166	46	16.6933	2998	8.9	188	16	242		35		74
Female	18	153	45	19.2234	2475	10.1	140	23	261		28		68.6
Female	18	166	54	19.5965	3219	9.1	188	17	185		32		80
Female	18	170	60	20.7612	3580	8.7	180	15	225		55		85.3
Female	18	171	58	19.8352	2868	9.5	155	24.5	241		31		76.5
Female	18	172	60	20.2812	3063	8.6	177	12.5	231		38		79.2
Male	18	177	59	18.8324	4937	7.1	220	-8.5		199		5	71.8
Female	18	165	52	19.1001	3348	8.5	193	25	204		31		87.5
Male	18	176	88	28.4091	5832	8.3	203	14		243		0	62
Male	19	177	70	22.3435	6130	7.1	111	10.5		233		10	73.6
Male	18	167	66	23.6652	4302	7.6	205	6.5		258		2	66
Male	18	180	71	21.9136	4625	7.6	220	10		217		3	71.9
Female	18	158	44	17.6254	2292	9.6	160	19	185		47		75.6
Male	18	175	75	24.4898	5404	7.1	245	13.5		248		20	82.8
Female	18	163	53	19.9481	3475	8.9	163	13	227		46		82.2
Male	18	180	78	24.0741	5855	6.8	265	5		214		2	78
Female	19	165	55	20.202	3734	8.1	195	25.5	207		43		90.1
Male	18	170	61	21.1073	3340	8.1	195	22.5		427		0	50.6
Male	19	175	77	25.1429	4828	7.1	225	18		216		18	81.8
Male	18	173	56	18.7109	4564	7.9	210	7.5		255		9	72.8
Male	20	177	63	20.1092	4876	7.6	205	18		271		2	68.3
Female	19	163	55	20.7008	4084	9.2	157	24	211		34		83.7
Male	19	180	66	20.3704	4813	8.2	247	1		197		9	77.9
Male	18	173	90	30.0712	4580	7.6	215	8		245		3	59.4
Female	18	160	60	23.4375	3069	8.9	180	16.4	221		41		80.6
Female	18	165	54	19.8347	3222	9	157	23.5	241		39		79.2
Male	18	168	67	23.7387	4038	8	195	7		267		0	61.9
Female	18	162	44	16.7657	2911	9.1	158	23	222		36		76.5
Male	19	180	60	18.5185	4243	7.3	240	20.5		237		5	74.2
Female	18	170	46	15.917	3114	8.8	190	28.4	273		32		75.9
Male	18	169	46	16.1059	4128	7.1	208	17.6		226		7	71.8
Male	19	166	50	18.1449	3398	7	249	12.8		237		15	79.6
Male	18	179	62	19.3502	4422	7.5	238	16.1		185		2	72.4
Male	18	163	55	20.7008	3845	7.5	188	15		251		9	69.2
Male	18	164	62	23.0518	4207	7.9	170	11.7		239		0	62.5
Female	19	171	59	20.1771	3904	8.6	176	11.1	217		43		84
Male	18	173	56	18.7109	4004	7	210	11.8		212		0	73.1
Female	18	163	63	23.7118	4086	10	120	3.5	287		13		52.4
Male	19	185	62	18.1154	5961	6.9	267	20.6		215		20	92.5
Female	18	163	55	20.7008	3289	8.9	141	16.4	241		51		76.3
Male	18	185	71	20.7451	5552	7.1	261	12.8		244		12	82.5
Male	19	192	85.5	23.1934	4962	8.4	176	10.5		266		0	61.6
Male	19	186	68	19.6555	5069	6.6	281	13.7		207		13	92.6
Female	18	171	53	18.1252	3725	8.5	165	10.7	218		45		82.8
Male	18	172	47	15.887	3597	8.2	208	16.2		271		5	62.4
Female	18	169	53	18.5568	2742	9.2	148	19.7	245		44		74.9
Female	18	161	54	20.8325	2720	8.9	147	20.3	207		47		79.9
Female	18	167	63	22.5896	3626	9.4	147	27	208		35		83.4
Male	18	185	67	19.5763	6027	6.9	258	18		205		3	82.5
Male	19	184	74	21.8573	4806	7.1	227	16.6		234		8	77.9
Female	18	171	57	19.4932	3432	8.5	182	16.5	243		44		83.4
Male	18	171	58	19.8352	4247	7.5	212	12.1		249		3	68.9
Female	18	159	59	23.3377	2505	9.1	160	17.4	237		43		76.5
Female	19	165	60	22.0386	4095	8.4	146	14.6	203		46		84.8
Male	19	173	44	14.7015	3722	7.7	217	14.7		242		4	65.5
Female	18	168	53.5	18.9555	2828	9.3	166	18.2	245		33		69.8
Female	19	161	46	17.7462	3813	9.2	160	19.5	213		49		84.1
Female	19	174	65	21.4692	4528	9.4	170	26	302		32		69.4
Male	19	182	65	19.6232	5222	9	262	11		239		9	76.9
Female	18	163	63	23.7118	3421	9.1	170	13	257		37		78.8
Male	18	182	67	20.227	3901	8.7	225	24		258		2	67.7
Female	19	167	45	16.1354	2641	9.1	180	9.5	235		45		74
Male	18	176	60	19.3698	5330	7.9	232	7		238		15	80.4
Female	19	167	52	18.6453	3363	7.8	170	13	216		47		85.5
Female	18	151	43	18.8588	3250	9.4	166	26	228		63		87.9
Female	18	161	58	22.3757	3338	8.3	200	23	215		49		88
Male	18	183	93	27.7703	5146	8	222	22		254		1	69.8
Male	18	173	68	22.7204	4954	8.2	200	6		253		2	66.3
Male	19	166	78	28.306	5137	8.3	210	16		246		2	65.2
Female	19	162	49	18.6709	3680	9.2	166	21	217		40		83.9
Female	18	173	63	21.0498	4494	8.6	175	14	238		42		82.4
Male	18	178	57	17.9902	3380	7.3	273	22		242		7	76.6
Female	19	169	47	16.456	3250	8.7	185	9	214		32		78
Male	18	167	51	18.2868	3173	7.6	205	7		236		16	73.5
Female	18	170	65	22.4913	4494	8.7	180	19	203		53		89
Male	18	166	54	19.5965	4270	7.7	220	20		251		14	77.8
Female	18	163	49	18.4425	3381	9.4	165	16	246		46		79
Male	19	186	91	26.3036	5735	9	245	14		275		9	69.2
Male	18	171	45	15.3894	3276	8.4	205	4.5		257		1	58.7
Male	18	173	76	25.3934	5146	7.1	257	16		241		3	72.7
Female	18	166	49	17.782	3220	10	152	11.5	244		31		73.8
Male	18	180	62	19.1358	6902	7.3	210	26		249		5	76.2
Male	19	176	56	18.0785	5190	7.5	212	5		244		3	71.4
Male	19	174	61	20.148	4715	7.5	190	10		213		5	69.8
Female	18	165	66	24.2424	4176	8.5	185	23	217		53		85.6
Male	18	169	65	22.7583	4650	6.3	260	17		215		9	85
Female	18	159	42	16.6133	3229	8.2	178	0	215		45		73.3
Male	19	177	59	18.8324	5600	7.1	230	12		234		9	79.8
Male	19	179	78	24.3438	5273	7.6	225	13		241		4	69.4
Male	18	179	59	18.4139	5263	7.1	220	9		240		8	77.6
Female	18	163	61	22.9591	3354	9.6	151	16	239		45		78.5
Female	18	165	77	28.2828	3549	9.5	110	6	255		28		63
Female	18	167	55	19.721	3293	9.3	157	22	261		32		76
Male	18	180	62	19.1358	4775	7.6	220	14		241		0	71
Male	18	163	59	22.2063	3906	7.1	208	7		281		6	66.2
Female	18	159	51	20.1733	3333	8.9	140	23	214		33		78.9
Male	19	169	55	19.257	4530	7.2	245	7		228		9	77
Male	19	174	62	20.4783	5263	7.3	200	12		238		4	71
Male	18	177	69	22.0243	5660	7.4	248	29		228		11	84.8
Female	18	165	50	18.3655	3305	8.2	165	17	217		49		84.4
Male	18	172	61	20.6193	4800	7.4	205	7		281		5	66.1
Male	19	176	60	19.3698	4469	6.8	230	20		241		30	95.9
Male	18	168	67	23.7387	3966	7.7	198	10		256		0	64.9
Male	19	187	66	18.8739	5379	6.7	250	16		206		6	85.6
Male	19	172	58	19.6052	4677	7.1	233	8		237		12	79.2
Male	18	169	73	25.5593	4390	7.3	220	7		249		1	66.2
Female	18	162	47	17.9089	3285	9.4	152	20	276		36		72.3
Male	19	182	64	19.3213	5509	7.7	208	11		257		0	71
Female	18	156	54	22.1893	2927	8.9	160	22	278		39		73.8
Female	18	156	58	23.833	2803	9.4	141	26	238		31		75.2
Female	18	174	75	24.7721	4699	10.9	149	15	243		40		64.6
Female	18	163	47	17.6898	3317	8.2	204	27	209		61		94
Female	19	160	56	21.875	3380	8.7	170	19	219		51		84.2
Male	19	165	52	19.1001	4004	7.2	203	14.5		229		15	77.3
Female	19	171	53	18.1252	4897	12	174	17	420		10		45
Male	18	178	60	18.937	5168	6.7	287	16		216		3	83.6
Male	19	178	77	24.3025	6397	7.5	187	11.5		237		7	68
Male	18	178	70	22.0932	5584	8.1	217	21		257		1	72.1
Male	18	167	76	27.2509	4619	7.9	215	11		288		2	62.4
Male	18	177	56	17.8748	5430	7.7	210	19.5		218		2	75.3
Male	18	183	76	22.694	5533	7.5	207	24.5		235		1	74.5
Female	18	165	50	18.3655	2884	9.4	174	24	228		41		79.9
Female	18	170	60	20.7612	3897	8.3	152	7	216		53		84
Male	19	182	70	21.1327	5269	7	229	12		257		2	74.2
Female	18	159	48	18.9866	2815	9.6	168	14.5	219		33		76.4
Male	18	180	67	20.679	4298	8.4	169	0		272		1	53.9
Male	18	181	74	22.5878	5215	7.5	226	9.5		232		4	74
Female	18	147	40	18.5108	2585	7.4	158	20.5	218		52		84.9
Male	19	172	96	32.45	4507	8.1	218	17.5		281		3	59.2
Female	18	172	53	17.9151	3111	8.7	169	11	420		50		64.5
Male	18	166	50	18.1449	4459	7.4	235	4.5		242		12	75
Male	17	174	68	22.46	4926	7.9	221	20.5		239		4	73.2
Female	18	166	54	19.5965	3398	8.8	184	19.5	227		48		83.6
Female	18	167	53	19.0039	2825	9.3	157	16.5	420		34		61.2
Male	19	183	71	21.201	5384	6.8	243	17.5		224		3	80
Male	18	173	56	18.7109	4791	7.4	246	19		183		4	75.8
Female	18	152	45	19.4771	2910	9.7	130	21	267		22		65.8
Female	18	162	57	21.7193	3617	8.4	210	19	184		43		87.2
Male	19	179	64	19.9744	5050	6.7	235	24.5		214		1	83.7
Female	19	171	52	17.7832	3446	9.6	162	15.5	221		42		80.8
Female	18	160	55	21.4844	4045	8.4	200	32	199		36		90.6
Male	19	173	72	24.0569	5057	7.9	208	20		227		6	73.5
Female	18	155	63	26.2227	3201	9.8	150	13.5	274		35		68.3
Male	18	179	57	17.7897	5114	7.3	212	5		259		5	68.6
Male	18	183	65	19.4094	4824	7.2	243	12		199		11	84.1
Male	18	184	75	22.1526	4986	8.1	200	12		238		1	68.7
Male	18	172	63	21.2953	4703	8	185	15		286		1	60.4
Female	18	170	57	19.7232	3900	9	186	9	233		45		81.8
Male	18	176	69	22.2753	5277	8.2	185	18		277		1	62.6
Male	17	182	66	19.9251	5564	7.7	230	17		248		1	73.2
Male	18	168	58	20.5499	4707	7	273	11		234		15	84.5
Female	19	161	46	17.7462	3017	11.1	158	22	243		34		64.7
Female	19	158	52	20.83	3380	9.6	158	25	240		41		80.2
Male	18	173	75	25.0593	5681	7.8	208	21		252		2	69.5
Female	18	163	65	24.4646	3167	10.1	135	15.5	274		19		60.5
Female	18	165	50	18.3655	2846	9.2	166	8	223		30		76
Female	18	165	56	20.5693	3315	8.1	215	13	224		32		84.1
Male	18	169	59	20.6575	4736	7.6	265	21		226		12	82.4
Male	18	176	66	21.3068	4979	7.5	220	22		226		10	81.7
Male	17	165	54	19.8347	3813	7.9	228	20		240		5	70.8
Female	18	168	55	19.487	3472	9.4	163	20	227		30		80.4
Male	18	180	76	23.4568	5696	8	218	19		259		7	74.2
Female	18	160	54	21.0938	4055	9.6	148	15	234		40		78
Male	19	171	60	20.5191	3301	8.1	191	7		245		5	61.7
Female	19	160	47	18.3594	3945	8.6	169	20.5	203		48		87.4
Female	19	156	45	18.4911	3431	10.3	184	22.5	215		56		86
Male	19	177	86	27.4506	5800	7.4	237	12.5		258		1	69.6
Female	19	168	48	17.0068	3397	8.5	190	20.5	183		51		84.8
Male	20	173	60	20.0474	5270	7.7	227	22.5		231		8	79.8
Female	19	165	61	22.4059	3302	9.5	164	15.5	217		51		81.8
Female	18	160	45	17.5781	3322	10.1	154	13.7	235		40		76.3
Male	18	176	70	22.5981	4251	7.9	205	10		247		3	66.9
Male	18	170	78	26.9896	4253	7.6	230	23		237		6	71.3
Male	19	178	54	17.0433	5062	7.6	238	-6		223		7	67.8
Male	19	176	64	20.6612	4510	7.8	207	23.5		226		13	78.7
Male	18	173	51	17.0403	3957	6.8	255	12.5		199		16	84.8
Female	18	162	55	20.9572	2906	9.5	143	9	251		30		70.7
Female	18	166	52	18.8707	3535	9.3	147	4	254		51		74.1
Female	18	150	47	20.8889	2461	9.9	140	20.5	242		48		71.4
Female	18	168	63	22.3214	4403	10	180	28.5	249		45		82
Male	19	173	68	22.7204	5063	7.5	230	16		234		9	79.6
Male	18	180	70	21.6049	4704	7.3	225	10		249		3	70.5
Male	18	185	62	18.1154	5146	8.2	235	18.5		242		2	71.6
Male	18	183	75	22.3954	5248	8.4	205	13		237		2	70.2
Male	19	183	75	22.3954	4652	7.5	236	15.5		231		2	73.2
Male	18	170	68	23.5294	5450	7.8	214	21		292		3	69.1
Female	18	165	48	17.6309	3791	9.3	114	8	223		28		72.4
Male	18	188	97	27.4445	6232	7.8	218	29		427		1	57.8
Female	18	161	58	22.3757	3927	8.9	145	12	221		42		79.2
Female	19	169	75	26.2596	4760	9.7	163	17	272		28		72.8
Male	19	172	63	21.2953	4287	7.2	210	17		217		0	72.1
Female	19	162	55	20.9572	3458	9.7	176	29	261		46		81.6
Male	19	171	61	20.8611	3995	7.3	225	14		275		10	71.9
Male	20	171	51	17.4413	4171	7.2	218	7		235		2	66.6
Male	18	175	70	22.8571	4470	7.4	240	18		261		3	70.6
Male	19	180	79	24.3827	3838	7.4	220	4		251		0	64.2
Male	18	174	64	21.1389	5033	6.7	235	14		245		6	79.8
Male	19	171	61	20.8611	4349	7.2	225	16		293		1	65
Female	19	162	68	25.9107	4025	10.7	137	17	253		39		66.4
Female	19	159	51	20.1733	3422	9.8	148	17	275		39		72.6
Female	19	158	42	16.8242	3024	8.9	155	21	261		50		74.8
Male	18	180	51	15.7407	5107	7.5	275	25		241		3	75.8
Male	19	175	64.5	21.0612	5099	7	218	23		234		10	83.2
Female	19	158	46	18.4265	3613	9.5	190	21	252		45		82
Male	18	169	56	19.6072	3578	7.4	218	22		294		3	63.5
Female	18	165	51	18.7328	2415	9.8	115	20	263		33		65.4
Female	19	164	58	21.5645	4431	8.9	175	17	252		36		80.6
Female	18	163	48	18.0662	3880	7.9	177	18	213		55		88.9
Female	18	154	42	17.7096	2862	12	196	10	420		44		49.8
Male	18	173	52	17.3745	4464	7.1	235	8		184		15	77.8
Male	18	175	69	22.5306	5097	8	215	16		273		0	67.8
Male	18	183	66	19.708	4189	6.9	285	20		229		8	82.4
Female	18	168	59	20.9042	2471	8.8	190	8	231		53		78.9
Female	18	158	52.5	21.0303	2934	8.7	175	15	221		38		79.9
Male	19	165	56.5	20.753	5200	9.2	205	14		240		0	66.8
Male	17	165	80	29.3848	3869	8.8	215	6		335		0	48.6
Female	19	170	58	20.0692	2852	9	150	19	263		47		74.6
Male	18	176	66	21.3068	3841	7.4	230	16.5		258		6	70.6
Female	18	163	49	18.4425	3073	8.2	180	31.3	185		53		85
Male	18	182	58	17.51	4155	7.2	235	20		251		2	68.3
Male	18	182	58	17.51	4830	7.1	255	14		266		3	69.3
Female	19	168	68	24.093	2836	8.9	180	20.5	277		33		70.6
Male	18	183	64	19.1108	4531	7.3	230	12.5		324		4	62.8
Male	19	180	70	21.6049	5126	7.5	200	20		252		1	71.3
Female	19	155	55	22.8928	2564	9	170	8.5	256		41		73.9
Male	18	183	82	24.4857	5321	7	240	15.5		274		3	69.2
Male	18	169	60	21.0077	4035	7.1	230	13		276		5	67.3
Female	19	171	65	22.2291	3956	9.5	170	17.7	234		22		77.8
Male	18	180	62	19.1358	4920	7.1	255	12.8		256		6	75.7
Male	18	176	76	24.5351	5385	7.5	245	18.1		264		3	70.4
Male	19	176	64	20.6612	4645	7.6	230	21.5		266		3	71
Male	18	176	51	16.4644	3434	7.1	255	20.6		267		5	67.5
Male	18	178	93	29.3524	5975	7.5	220	5		266		0	64.2
Male	18	174	76	25.1024	5481	7.9	190	16.8		247		0	65.2
Female	19	161	49	18.9036	2976	9	170	19.4	228		55		81.4
Male	18	183	59	17.6177	5274	7	225	10		247		0	71.6
Male	19	183	60	17.9163	4920	7.9	195	23.3		289		2	66.2
Female	18	164	60	22.3081	3058	9.5	175	22.3	231		54		81.9
Female	18	156	54	22.1893	3097	8	190	26.3	198		55		92
Female	18	170	43	14.8789	2896	8.7	200	18.8	235		44		78
Male	18	167	67	24.0238	4615	7.5	200	11.4		279		0	61
Female	18	161	52	20.061	2780	9.6	130	13.3	234		41		69.9
Female	18	158	42	16.8242	3178	9.1	155	16	259		31		72.3
Female	18	162	59	22.4813	3199	9	205	23	263		41		80.8
Male	19	173	86	28.7347	4621	7.6	215	6.7		284		2	59.1
Male	18	179	70	21.847	5377	7.4	215	13.4		240		8	77
Female	19	171	59	20.1771	3700	8.7	187	23.1	359		50		70.7
Male	18	182	93	28.0763	5385	7.2	230	9.1		259		0	66
Male	19	185	65	18.992	4910	6.8	260	14.7		241		4	77
Female	18	160	53	20.7031	2148	9	165	14.3	235		42		75.1
Male	19	180	65.5	20.216	5093	7.3	220	24		234		10	82.5
Female	18	168	50	17.7154	3402	8.7	185	13.4	194		51		88.7
Female	18	170	57.5	19.8962	3900	8.9	160	21.5	233		61		87.1
Male	19	182	86	25.963	5208	7.5	215	6.9		266		0	67.2
Female	18	165	50	18.3655	3000	8.5	195	9.4	226		40		81
Male	18	174	68	22.46	5420	7.3	205	12.7		183		13	82
Male	18	172	61	20.6193	5037	7.2	237	25.8		229		8	81.5
Male	18	172	57	19.2672	4500	8.2	265	4		223		12	78
Female	18	172	63	21.2953	3300	8.9	180	14.6	256		40		78.9
Female	19	171	60	20.5191	5000	9.1	140	12.1	268		45		74.4
Female	19	171	52.5	17.9542	4100	9.8	145	22.5	252		42		77
Female	18	166	51	18.5078	3650	9.4	160	17.9	251		30		78
Female	19	162	57	21.7193	3319	9	160	20.1	218		45		81.3
Male	18	172	56	18.9292	4688	6.9	230	4.8		217		13	82
Male	19	175	56.5	18.449	4958	7.1	230	8		213		8	79.8
Female	19	164	61	22.68	2618	10.2	147	19	249		34		71.6
Male	19	176	63	20.3383	5377	8.3	215	28.7		258		0	72.6
Male	19	184	77	22.7434	5408	7.2	240	16.8		279		2	71
Female	18	167	71	25.4581	4218	9.1	195	6.9	359		41		63.8
Male	18	184	81	23.9249	6280	6.9	235	25.7		214		0	82.2
Male	19	178	62	19.5682	5190	7.4	235	9		236		6	75.8
Female	18	169	59	20.6575	3626	8.3	178	13	420		10		60.8
Male	19	176	60	19.3698	5046	7.3	240	18.7		218		12	84
Female	18	171	63.5	21.7161	3200	9.1	152	15.7	185		53		79.8
Female	19	166	69	25.0399	2451	9.5	163	21.5	283		42		68.7
Male	18	170	90	31.1419	4469	7.8	192	8		314		0	50
Female	18	165	47	17.2635	3321	9.5	165	11	273		32		74.1
Male	18	169	50	17.5064	3513	7	203	1.3		258		6	61.7
Female	18	155	60	24.974	3000	10	155	11	292		35		64
Female	18	171	57	19.4932	2577	9.1	163	21	255		33		75
Male	19	177	68	21.7051	4851	7.4	208	11		231		4	71.9
Female	19	160	45	17.5781	2801	8.5	153	11	238		40		76.8
Male	18	182	60	18.1138	4677	7.2	185	8		243		1	63
Male	18	170	69	23.8754	4394	7.5	212	19.4		256		2	69.6
Female	18	165	51	18.7328	3560	9.5	158	23.1	231		31		80.6
Male	18	171	50	17.0993	5332	7.7	240	15		236		18	81.3
Female	18	165	65	23.8751	3504	9.7	160	8	278		17		67
Male	18	172	57	19.2672	5060	8.3	225	14.6		269		0	69.8
Male	18	173	55	18.3768	3959	7.1	230	13		227		6	73.9
Female	18	162	51	19.433	3008	8.2	165	15.3	205		56		85.2
Female	18	160	48	18.75	2474	8.7	160	17	248		40		76
Male	19	171	58	19.8352	3747	7.7	215	-2		248		5	61.1
Female	19	160	66	25.7812	2748	10	145	22	244		37		65
Male	18	172	63	21.2953	5052	7.4	225	11.3		252		0	72.6
Male	18	174	58	19.1571	4448	8.1	235	17		245		9	75
Female	18	160	46	17.9688	3055	10.3	153	17	242		47		73.4
Male	18	183	88	26.2773	6415	7.7	212	10		244		1	68.8
Male	18	181	77	23.5036	4865	8	207	15		268		0	67.1
Female	20	172	56	18.9292	1913	11.2	145	8	264		44		52.3
Female	19	162	46	17.5278	2775	9	153	15	238		32		75.1
Male	19	168	52	18.424	3257	7.6	220	17.5		248		15	75.1
Male	18	182	62	18.7175	5358	8.1	240	17.5		271		2	71.4
Female	19	161	49	18.9036	2805	8.8	167	16	245		49		78.1
Female	18	155	45	18.7305	3156	8.6	170	16	228		61		85.1
Female	18	150	37	16.4444	2742	9.2	140	-1	271		43		59.7
Female	18	164	57	21.1927	3765	9.7	140	13	242		42		75.2
Female	19	158	50	20.0288	3130	9.6	165	16	241		46		76
Male	19	175	79	25.7959	6225	8.3	190	14		245		2	64
Female	18	156	53	21.7784	2574	8.9	140	19	228		46		74.9
Male	18	180	90	27.7778	5352	7.9	205	14		273		0	63.8
Male	18	176	60	19.3698	4546	6.8	255	8		211		10	83.6
Male	18	175	80	26.1224	4183	8.1	200	3		259		1	59.5
Male	18	174	59	19.4874	4510	7.3	200	7		257		1	66.2
Female	19	155	49	20.3954	3233	9.6	165	19	264		38		75.8
Female	18	163	50	18.8189	3443	9.2	150	25	228		54		83.6
Male	19	175	72	23.5102	4563	7.3	200	19		226		2	71
Male	19	167	65	23.3067	4808	8.1	185	1		272		0	58.5
Female	18	160	72	28.125	3248	9.1	180	18	236		46		74.5
Male	18	179	60	18.726	3874	7.3	215	14		241		13	76.6
Male	19	171	50	17.0993	4170	8.3	180	3		246		0	56
Female	19	167	72	25.8166	3103	9.1	140	24	246		46		72.9
Female	19	169	52	18.2066	4915	10	155	9	242		52		78.4
Male	18	168	80	28.3447	4542	7.7	185	13		276		0	54
Female	19	167	53	19.0039	3272	9.2	155	11	239		54		78.8
Male	18	173	78	26.0617	5928	7.1	240	21		268		1	71.1
Female	18	170	65	22.4913	3811	9.1	145	15	259		35		75.6
Male	20	185	78	22.7904	5085	7.4	235	8		212		1	76
Female	17	162	40	15.2416	2723	8.3	185	22	216		29		78.8
Male	18	176	66	21.3068	3980	7.5	235	-3		246		2	62.5
Male	19	181	69	21.0616	5642	7.4	235	1		244		10	75.4
Female	19	161	53	20.4467	3539	9.4	170	21	244		51		82.2
Male	18	170	49	16.955	3936	7.9	195	6		261		9	64.2
Female	19	163	60	22.5827	4020	9.5	145	28	232		30		79.2
Female	19	166	60	21.7738	3758	9.6	185	28	244		26		81.6
Female	19	166	53	19.2336	3484	9.1	170	15	242		51		81.7
Female	19	155	65	27.0552	3610	9.2	155	19	249		40		76.6
Female	18	159	50	19.7777	2904	9.7	171	12.6	244		40		75.9
Male	18	185	74	21.6216	5680	6.6	217	22.4		257		1	78.6
Male	19	174	86	28.4053	5638	7.5	198	19.3		237		1	66
Male	18	179	75	23.4075	4636	7	247	5.2		258		5	72.5
Female	18	161	59	22.7615	4236	9.3	178	23	243		50		83.7
Female	18	159	53	20.9644	3249	9.3	160	16	184		52		80.8
Female	18	167	60	21.5139	3261	9.4	180	6	242		51		78
Female	18	160	67	26.1719	4465	9.6	150	28	235		54		79.5
Female	18	168	58	20.5499	3602	8.9	170	10	246		55		82.1
Female	18	161	49.5	19.0965	2785	8.7	170	20	232		55		81.2
Female	19	171	65	22.2291	3693	8.3	170	18	233		30		82.6
Male	19	180	62	19.1358	4032	7.8	250	12		228		8	74.7
Female	19	164	50	18.5901	3216	8.4	175	6	265		40		76.8
Male	19	175	72	23.5102	5377	7.5	205	16		275		0	67.8
Male	18	175	52	16.9796	3758	6.9	230	9		241		7	70.7
Male	18	188	61	17.2589	4442	6.8	245	8		204		0	75.4
Male	18	172	72	24.3375	5195	7.5	210	12		285		0	65.2
Male	18	175	60	19.5918	2380	7.1	215	17		251		4	60.1
Male	18	178	65	20.5151	4796	7.3	190	10		238		0	66.5
Male	19	170	55	19.0311	4339	7.1	265	23		258		19	83.8
Female	18	163	60	22.5827	3467	8.9	163	23	227		52		85.2
Female	18	170	60	20.7612	4115	9.1	180	22	215		41		85.1
Male	18	164	53	19.7055	3666	7.2	230	13		265		10	73.4
Male	18	180	63	19.4444	3834	7.8	210	10		286		1	63
Female	18	163	46	17.3134	2721	8.8	180	24	233		40		80.8
Female	19	159	47	18.591	5667	9.2	165	22	234		46		82.5
Male	18	165	64	23.5078	3786	8	215	16		297		0	61.3
Male	19	178	85	26.8274	2806	7.8	205	3		273		0	52.4
Male	18	180	67	20.679	5526	7.1	210	6		237		1	73
Female	18	156	60	24.6548	3034	9.2	130	21	235		41		69.7
Male	18	176	92	29.7004	5284	8.1	195	8		262		0	60.4
Male	19	175	85	27.7551	4874	8.1	220	15		265		0	66.1
Female	19	165	57	20.9366	3236	9.1	195	19	226		37		81.8
Female	18	168	54	19.1327	3064	9.1	160	19	231		35		78
Male	19	175	67	21.8776	5418	7	255	19		226		3	78.6
Female	18	170	52	17.9931	2334	10.3	125	19	267		41		64.7
Male	19	185	105	30.6793	4930	8	192	15.2		319		0	52.9
Female	19	183	84	25.0829	3312	10.1	145	24.5	262		28		70.4
Female	18	162	47	17.9089	2361	10.3	155	20.2	249		43		72.7
Male	19	187	78	22.3055	5829	8.1	205	15.4		243		0	68.6
Female	18	166	62	22.4996	3477	9.1	155	23.5	259		38		80
Male	18	173	68	22.7204	4752	7.9	223	23		256		1	71
Female	18	161	58	22.3757	2980	9.6	145	0.5	254		40		64.9
Male	18	170	51	17.6471	4793	7.1	220	4.8		185		20	79.5
Male	18	173	64	21.3839	5155	7.9	215	-2.8		272		0	62.6
Male	18	173	62	20.7157	4681	7	220	11.2		244		0	72.3
Female	19	152	45.5	19.6936	2256	8.6	193	18.5	228		43		79.3
Male	18	170	52	17.9931	4470	7.4	225	17		251		5	71.4
Male	18	180	73	22.5309	4551	7.6	220	8.5		268		0	67.8
Female	18	166	64	23.2254	4143	9.2	150	15.6	240		48		78.8
Male	18	178	85	26.8274	5068	8.3	180	11		319		0	53.6
Female	19	166	47	17.0562	2936	10.2	165	22.5	258		35		71.5
Male	18	185	75	21.9138	5280	6.7	275	8		223		3	82.2
Female	19	166	57	20.6852	3418	9	193	20	242		36		82.3
Female	18	161	44	16.9747	2357	8.8	160	10	235		20		67.7
Male	18	170	82	28.3737	4248	7.6	230	17.8		335		0	54.5
Female	18	156	50	20.5457	2926	9	170	16.6	238		34		77.5
Male	19	175	65	21.2245	4300	7.7	196	17.3		245		4	62.6
Male	18	187	71	20.3037	4570	7.1	235	18.6		268		5	72
Female	18	161	54	20.8325	3833	8.3	210	19	226		46		87.6
Male	18	180	75	23.1481	3788	7	215	7		289		0	65.1
Female	18	161	47	18.132	3537	8.8	180	12.1	242		35		80.6
Male	18	176	54	17.4329	4222	7	251	16.6		235		7	74.3
Female	18	162	51	19.433	3545	9.2	185	26.5	239		28		83
Female	20	158	51	20.4294	2762	8.2	180	30	211		51		85.4
Female	19	164	48	17.8465	2524	10.1	151	19.8	241		19		68.3
Female	18	163	70	26.3465	3450	9.5	161	27	258		30		76.8
Male	19	180	47	14.5062	3788	8.1	200	11.5		286		0	57.5
Male	18	180	64	19.7531	4541	6.8	243	12.5		253		5	75
Male	18	176	78	25.1808	4577	7.3	212	12		241		2	67.2
Female	18	163	57	21.4536	3892	8.8	173	21.8	234		45		83.7
Female	18	171	54	18.4672	3842	8.6	193	4	207		62		87.7
Female	18	165	74	27.1809	3752	9.2	150	16.5	279		44		71.4
Male	18	160	58	22.6562	3954	7.6	197	18.5		241		2	66.3
[truncated: 10,283 more rows]
